# Supplementary material for: The Histone Demethylase Jumonji Coordinates Cellular Senescence Including Secretion of Neural Stem Cell–Attracting Cytokines
Source: Oxford University Press journal article supplement (doi:10.1158/1541-7786.mcr-13-0268), 2015-02-04
Supplement: 15417786mcr130268-sup-113857_2_supp_0_nhp7p2.xls [file 15417786mcr130268-sup-113857_2_supp_0_nhp7p2.xls]

## Sheet: Sheet1
	Gene symbol IPA "Cancer-related"	Gene symbol IPA "Inflammatory-related"	Gene symbol both IPA "Cancer-related" and "Inflammatory-related"
1	AAMDC	ABI1	AGT
2	AATK	ADA	AGTR1
3	ABCB1	AFAP1L2	ANPEP
4	ABCB10	AGT	BTN2A1
5	ABCB4	AGTR1	C3
6	ABL2	ANPEP	CACNA1C
7	ABLIM3	BTN2A1	CDH11
8	ACP5	C3	COL3A1
9	ADAM28	CA12	CSF1R
10	ADAMTS12	CACNA1C	CSF2
11	ADAMTS14	CCL11	CTSC
12	ADAMTS18	CCL20	CTSH
13	ADAMTS2	CD151	CXCL12
14	ADAMTS3	CD93	CXCL2
15	ADAMTS9	CDH11	CXCL9
16	ADAMTSL1	CLEC11A	EDNRA
17	ADM	COL3A1	F2R
18	AFAP1L1	CSF1R	FGF1
19	AFF3	CSF2	FLT1
20	AFP	CTSC	FN1
21	AGMO	CTSH	FPR1
22	AGT	CXCL12	FPR2
23	AGTR1	CXCL2	GNAS
24	AIM2	CXCL3	HRH1
25	AKR7A2P1	CXCL5	ICAM1
26	ALDH1A1	CXCL9	IL1RAP
27	ALX4	DARC	IL6
28	ANKRD30A	DCN	IL6ST
29	ANPEP	DGAT2	IL8
30	ANTXR1	DUSP3	ITGA4
31	ANTXR2	EDNRA	ITGA5
32	ARG2	F2R	ITGB3
33	ARHGAP31	FGF1	JAK1
34	ARHGDIB	FLT1	JAM3
35	ARHGEF2	FN1	KITLG
36	ARMCX5	FPR1	LAT
37	ARRB1	FPR2	LBP
38	ASPH	GNAS	MGLL
39	ATOH8	HEBP1	MMP1
40	ATP10D	HRH1	MMP14
41	ATP2B1	ICAM1	MMP9
42	BDKRB1	ICAM3	NLRP3
43	BDKRB2	IL12A	NOS3
44	BGN	IL1RAP	NT5E
45	BMP2	IL6	PAEP
46	BMP7	IL6ST	PDE3A
47	BMPER	IL8	PDGFA
48	BST2	ITGA4	PDGFRB
49	BTBD11	ITGA5	PGF
50	BTN2A1	ITGB3	PIK3CG
51	C10orf90	JAK1	PLAU
52	C11orf63	JAM3	PLAUR
53	C1R	KITLG	PPBP
54	C1S	LAT	PTGS1
55	C3	LBP	PTX3
56	CACHD1	LCP1	RAPGEF3
57	CACNA1C	LPAR2	S100A4
58	CACNA2D4	MAGT1	SAA1
59	CADM3	MGLL	SELPLG
60	CALD1	MMP1	SERPING1
61	CALR	MMP14	SLPI
62	CALU	MMP9	TGFB2
63	CAMK2N1	MR1	TGFBR2
64	CAPN6	NGF	TGM2
65	CASP8	NLRP3	THBD
66	CATSPER1	NOS3	THBS1
67	CBS	NT5E	TIMP1
68	CD33	PAEP	ABI1
69	CDH11	PAG1	TIMP3
70	CDH6	PAX6	TNF
71	CDK5R2	PDE3A	TNFRSF6B
72	CES1	PDGFA	VEGFC
73	CFB	PDGFRB	WNT5A
74	CHGB	PDLIM1
75	CHI3L1	PF4
76	CHI3L2	PGF
77	CHPF2	PIK3CG
78	CHRD	PLA2G7
79	CHRDL1	PLAU
80	CKAP4	PLAUR
81	CLCA2	PNPLA3
82	CLCN2	PPBP
83	CLDN1	PTGIR
84	CLDN2	PTGS1
85	CNTNAP2	PTPN22
86	COG3	PTX3
87	COL12A1	RAC2
88	COL18A1	RAPGEF3
89	COL1A1	S100A4
90	COL1A2	SAA1
91	COL27A1	SCARB1
92	COL3A1	SELPLG
93	COL4A1	SERPINA1
94	COL4A2	SERPINA3
95	COL5A2	SERPING1
96	COL6A3	SLPI
97	COLEC12	TGFB2
98	COPG1	TGFBR2
99	CP	TGM2
100	CPE	THBD
101	CPEB4	THBS1
102	CPPED1	TIMP1
103	CREB3L2	TIMP3
104	CRELD1	TNF
105	CSF1R	TNFAIP6
106	CSF2	TNFRSF6B
107	CSGALNACT2	TPST1
108	CSMD2	VEGFC
109	CTSB	WNT5A
110	CTSC	XBP1
111	CTSD
112	CTSH
113	CUX1
114	CXCL12
115	CXCL2
116	CXCL9
117	CYP24A1
118	DAAM2
119	DAB2
120	DBI
121	DCHS1
122	DENND1B
123	DFNA5
124	DGKB
125	DGKI
126	DIXDC1
127	DKK2
128	DLC1
129	DMD
130	DPYD
131	DSG2
132	DUSP1
133	ECM1
134	EDEM3
135	EDNRA
136	EGFL7
137	EGFLAM
138	EGFR
139	EIF2AK3
140	EMILIN2
141	EMILIN3
142	EMP1
143	EMR1
144	ENG
145	ENPP2
146	EPAS1
147	EPG5
148	EPYC
149	ERCC2
150	EREG
151	ESM1
152	EVI2A
153	EXT1
154	EYA2
155	F2R
156	F2RL2
157	FABP4
158	FAM13A
159	FAM155A
160	FAM198B
161	FAM214B
162	FAM43B
163	FAP
164	FAT1
165	FBLN5
166	FCRLB
167	FGD6
168	FGF1
169	FGF5
170	FILIP1L
171	FKBP9
172	FLNB
173	FLT1
174	FLVCR2
175	FMNL1
176	FMNL3
177	FN1
178	FOXA3
179	FOXF1
180	FOXN2
181	FOXP1
182	FOXQ1
183	FPR1
184	FPR2
185	FRMD6
186	FST
187	FTL
188	GALC
189	GALNT10
190	GAS1
191	GBP3
192	GFPT1
193	GIT2
194	GLIPR1
195	GLRX2
196	GLT8D2
197	GNAS
198	GOLGA5
199	GPX3
200	GPX7
201	GPX8
202	GRB10
203	GREB1
204	GREM2
205	GUCY1A3
206	H19
207	HAO1
208	HAPLN3
209	HAS2
210	HBE1
211	HBEGF
212	HECW1
213	HHIP
214	HIC1
215	HIVEP2
216	HLX
217	HM13
218	HMCN1
219	HRH1
220	HSP90B1
221	HSPA13
222	HSPA6
223	HSPG2
224	IBSP
225	ICAM1
226	IER3
227	IFITM2
228	IFT20
229	IGF2BP3
230	IGFBP1
231	IGFBP3
232	IGFBP4
233	IGFBP5
234	IGFBP7
235	IGSF9
236	IL13RA2
237	IL1R1
238	IL1RAP
239	IL27RA
240	IL6
241	IL6ST
242	IL8
243	INHBA
244	INHBB
245	INPP4A
246	IQSEC1
247	ISLR
248	ITGA1
249	ITGA2
250	ITGA4
251	ITGA5
252	ITGA6
253	ITGB3
254	JAK1
255	JAM2
256	JAM3
257	KALRN
258	KAZN
259	KCNG1
260	KCNJ6
261	KCNK6
262	KCNQ2
263	KDR
264	KIAA1199
265	KIAA1462
266	KIAA1467
267	KIF21B
268	KITLG
269	KLHL4
270	KRT14
271	KRT19
272	KRT20
273	KRT34
274	KRT5
275	KRT79
276	KRTAP1-1
277	LAMC1
278	LAT
279	LBP
280	LDB2
281	LGR4
282	LHFPL2
283	LHX9
284	LMAN1
285	LMCD1
286	LMLN
287	LMO7
288	LOXL2
289	LPHN2
290	LPPR3
291	LRP1
292	LRP12
293	LRRC15
294	LRRC17
295	LRRC4C
296	LRRTM3
297	LSAMP
298	LTBP1
299	LTBP2
300	LUM
301	MACROD2
302	MAFB
303	MAGED1
304	MAGED2
305	MAGEH1
306	MAP2
307	MAP4K4
308	MAPK13
309	MATN2
310	MEGF10
311	MEOX2
312	MGLL
313	MGP
314	MICAL2
315	MME
316	MMP1
317	MMP12
318	MMP13
319	MMP14
320	MMP16
321	MMP2
322	MMP3
323	MMP7
324	MMP9
325	MRC2
326	MSX2
327	MTUS2
328	MUM1L1
329	MYO1B
330	MYOM3
331	NAV1
332	NCAM1
333	NCOA3
334	NDRG2
335	NEK7
336	NEO1
337	NFE2L3
338	NID2
339	NIPAL4
340	NLRP3
341	NME4
342	NNMT
343	NOS3
344	NOTCH3
345	NOTCH4
346	NPAS2
347	NPTXR
348	NT5E
349	NUCB1
350	NUPR1
351	NXPH4
352	ODF2L
353	OLFM2
354	OLFML3
355	P2RX6
356	P2RY6
357	P4HA1
358	P4HB
359	PAEP
360	PAPLN
361	PAPSS2
362	PARVA
363	PASD1
364	PCDH18
365	PCDHB6
366	PCOLCE
367	PCOLCE2
368	PDCD1LG2
369	PDE2A
370	PDE3A
371	PDGFA
372	PDGFC
373	PDGFRB
374	PDGFRL
375	PDZK1IP1
376	PGF
377	PI3
378	PI4KB
379	PIK3CG
380	PITPNM2
381	PLAU
382	PLAUR
383	PLCXD2
384	PLOD1
385	PLOD2
386	PLXDC1
387	PODXL
388	POFUT2
389	POSTN
390	POU2F2
391	PPAP2B
392	PPAPDC1A
393	PPBP
394	PPM1H
395	PPP4R4
396	PRKCA
397	PRR16
398	PRRC1
399	PRSS23
400	PTGER2
401	PTGFR
402	PTGS1
403	PTPN4
404	PTPRM
405	PTPRU
406	PTX3
407	PVRL3
408	PXDN
409	RAB11FIP1
410	RAPGEF3
411	RASSF5
412	RASSF8
413	RBM19
414	RBMS2
415	RFTN2
416	RGS5
417	RHCG
418	RNASE4
419	RNF17
420	RPN2
421	RTN2
422	RUNX2
423	S100A4
424	SAA1
425	SALL4
426	SAMD4A
427	SBSN
428	SEC23A
429	SEC24D
430	SEC31A
431	SELPLG
432	SEMA3C
433	SEMA5A
434	SERPINA10
435	SERPINA5
436	SERPINB7
437	SERPING1
438	SGK2
439	SHOX2
440	SLC10A7
441	SLC26A2
442	SLC36A1
443	SLC45A3
444	SLC4A3
445	SLC7A5
446	SLPI
447	SMTN
448	SNPH
449	SPARC
450	SPRY4
451	SRD5A1
452	SSPN
453	STARD10
454	STC1
455	STMN3
456	STXBP5
457	SYNE3
458	SYT13
459	TAGLN2
460	TBC1D2B
461	TBC1D8B
462	TBL1X
463	TENM4
464	TFPI
465	TGFB2
466	TGFBI
467	TGFBR2
468	TGM2
469	THBD
470	THBS1
471	THBS2
472	TIMP1
473	TIMP3
474	TLL1
475	TLX2
476	TM4SF1
477	TMEM106A
478	TMEM132A
479	TMEM158
480	TMEM39A
481	TNF
482	TNFRSF11B
483	TNFRSF19
484	TNFRSF6B
485	TNFSF10
486	TNFSF15
487	TNIK
488	TNIP1
489	TNIP3
490	TNNT1
491	TPM1
492	TRAK1
493	TRIM29
494	TRPM2
495	TRPM4
496	TTC17
497	TTC3
498	TXNDC15
499	UNC5B
500	USO1
501	USP47
502	VASH1
503	VEGFC
504	VGLL3
505	VSTM2L
506	WDR81
507	WIF1
508	WIPI1
509	WISP2
510	WNT5A
511	ZAK
512	ZEB2
513	ZFPM2
514	ZIC2
515	ZNF280B
516	ZNF692
