# Supplementary material for: The Histone Demethylase Jumonji Coordinates Cellular Senescence Including Secretion of Neural Stem Cell–Attracting Cytokines
Source: Oxford University Press journal article supplement (doi:10.1158/1541-7786.mcr-13-0268), 2015-02-04
Supplement: 15417786mcr130268-sup-113857_2_supp_0_nhpvkw.xlsx [file 15417786mcr130268-sup-113857_2_supp_0_nhpvkw.xlsx]

## Sheet: All transcripts
	U251.JMJD3wt
	(all U251.JMJD3wt vs. vector control)
	Transcript	Gene Symbol	Ratio	p-value
1	NM_130786	A1BG	1.48042	0.225121
2	NR_015380	A1BG-AS1	1.45046	0.0724694
3	NM_014576	A1CF	1.00784	0.413269
4	NM_138932	A1CF	1.0069	0.413488
5	NM_001198818	A1CF	1.00479	0.413981
6	NM_138933	A1CF	1.00474	0.414
7	NM_001198820	A1CF	1.00368	0.414246
8	NM_001198819	A1CF	1.00199	0.41464
9	NM_000014	A2M	3.15704	0.0301252
10	NR_046256	A2ML1	1.05495	0.373901
11	NM_144670	A2ML1	1	?
12	NR_040112	A2MP1	0.875323	0.373901
13	NM_017436	A4GALT	5.01295	0.00910092
14	NM_016161	A4GNT	0.950427	0.792571
15	NR_037584	AA06	1.26903	0.373901
16	NM_015665	AAAS	0.750849	0.323908
17	NM_001173466	AAAS	0.756771	0.701778
18	NM_023928	AACS	0.81602	0.0190983
19	NR_024035	AACSP1	2.20739	0.0136747
20	NM_001086	AADAC	0.900991	0.373901
21	NM_207365	AADACL2	1.12917	0.373901
22	NM_001103170	AADACL3	1.00015	0.974444
23	NM_001103169	AADACL3	1.00208	0.976014
24	NM_001013630	AADACL4	1.06163	0.373901
25	NM_016228	AADAT	0.535732	0.129316
26	NM_182662	AADAT	0.863503	0.835562
27	NM_153698	AAED1	0.632946	0.0396422
28	NM_024666	AAGAB	0.631051	0.174446
29	NM_001271886	AAGAB	0.894676	0.533632
30	NM_001271885	AAGAB	0.865941	0.719394
31	NM_014911	AAK1	1.15648	0.0943373
32	NM_024684	AAMDC	0.814732	0.314001
33	NM_001087	AAMP	0.727778	0.00079399
34	NM_001166579	AANAT	1.06095	0.657778
35	NM_001088	AANAT	1.09121	0.692612
36	NM_015511	AAR2	1.08383	0.763902
37	NM_001271874	AAR2	1.03154	0.849488
38	NM_001025357	AARD	0.906862	0.373901
39	NM_001605	AARS	1.00399	0.983499
40	NM_020745	AARS2	0.779484	0.183034
41	NM_001261434	AARSD1	0.911476	0.499067
42	NM_181806	AASDH	0.761262	0.110641
43	NM_015423	AASDHPPT	0.961679	0.773948
44	NM_005763	AASS	0.338117	0.00791622
45	NM_012138	AATF	0.742723	0.282495
46	NM_004920	AATK	1.54807	0.00726532
47	NM_001080395	AATK	1.07492	0.00744427
48	NR_027255	AATK-AS1	0.843186	0.138826
49	NM_020686	ABAT	1.37751	0.0800769
50	NM_001127448	ABAT	1.16848	0.0923183
51	NM_000663	ABAT	1.0003	0.106652
52	NM_005502	ABCA1	2.36539	0.0130864
53	NM_080282	ABCA10	1.1175	0.623968
54	NR_002451	ABCA11P	0.932545	0.744701
55	NM_173076	ABCA12	0.868391	0.456259
56	NM_015657	ABCA12	0.983838	0.901114
57	NM_152701	ABCA13	1.74219	0.221474
58	NR_003574	ABCA17P	0.959056	0.694919
59	NM_212533	ABCA2	1.23537	0.468169
60	NM_001606	ABCA2	1.44813	0.481584
61	NM_001089	ABCA3	0.348287	0.0126197
62	NM_000350	ABCA4	1.28739	0.0797776
63	NM_018672	ABCA5	1.36463	0.647619
64	NM_172232	ABCA5	0.90431	0.671333
65	NM_080284	ABCA6	1.46721	0.186228
66	NM_019112	ABCA7	1.19312	0.733674
67	NM_007168	ABCA8	1.11082	0.839091
68	NM_080283	ABCA9	1.13903	0.497073
69	NM_000927	ABCB1	4.71024	0.00386263
70	NM_012089	ABCB10	0.894077	0.766221
71	NM_003742	ABCB11	0.70111	0.00732165
72	NM_018849	ABCB4	1.4906	0.564889
73	NM_018850	ABCB4	0.834071	0.753006
74	NM_000443	ABCB4	1.08052	0.821959
75	NM_178559	ABCB5	1.10437	0.117408
76	NM_001163941	ABCB5	1.01875	0.373804
77	NM_001163942	ABCB5	1.0012	0.992097
78	NM_005689	ABCB6	0.582996	0.0236267
79	NM_001271696	ABCB7	0.628478	0.370133
80	NM_004299	ABCB7	0.665686	0.398459
81	NM_001271699	ABCB7	1.52859	0.528687
82	NM_001271698	ABCB7	1.32429	0.533353
83	NM_001271697	ABCB7	1.46236	0.551386
84	NM_007188	ABCB8	1.17557	0.435686
85	NM_203444	ABCB9	0.706993	0.138241
86	NM_001243013	ABCB9	2.15305	0.252083
87	NM_019624	ABCB9	1.80399	0.391028
88	NM_001243014	ABCB9	1.12708	0.636661
89	NM_019625	ABCB9	0.855679	0.716178
90	NM_004996	ABCC1	1.1443	0.623538
91	NM_033450	ABCC10	2.52411	0.0382663
92	NM_001198934	ABCC10	1.06443	0.870575
93	NM_033151	ABCC11	1.00036	0.847445
94	NM_032583	ABCC11	1.00663	0.858767
95	NM_145186	ABCC11	1.01739	0.884846
96	NM_033226	ABCC12	0.931915	0.373901
97	NM_000392	ABCC2	1.18155	0.40432
98	NM_003786	ABCC3	0.442732	0.100931
99	NM_001144070	ABCC3	0.692313	0.327235
100	NM_005845	ABCC4	1.32523	0.0311254
101	NM_001105515	ABCC4	1.28053	0.41879
102	NM_005688	ABCC5	1.47104	0.0801738
103	NM_001023587	ABCC5	1.03424	0.851773
104	NM_001171	ABCC6	1.08959	0.748986
105	NM_001079528	ABCC6	0.909412	0.777353
106	NR_003569	ABCC6P1	1	?
107	NR_023387	ABCC6P2	1.30494	0.521399
108	NM_000352	ABCC8	1.04299	0.49208
109	NM_020297	ABCC9	6.68421	0.117926
110	NM_005691	ABCC9	1.01489	0.937338
111	NM_000033	ABCD1	1.07367	0.843055
112	NM_005164	ABCD2	0.965689	0.373901
113	NM_002858	ABCD3	0.672536	0.0147763
114	NM_001122674	ABCD3	0.499388	0.0433426
115	NM_005050	ABCD4	0.893018	0.671817
116	NR_003256	ABCD4	0.932306	0.846744
117	NM_001040876	ABCE1	1.75292	0.499798
118	NM_002940	ABCE1	0.938102	0.813895
119	NM_001025091	ABCF1	0.730883	0.042772
120	NM_001090.6	ABCF1	1.02863	0.866569
121	NM_007189	ABCF2	0.791991	0.300556
122	NM_005692	ABCF2	3.05029	0.324429
123	NM_018358	ABCF3	0.823774	0.100717
124	NM_207629	ABCG1	2.37119	0.130594
125	NM_016818	ABCG1	1.84089	0.158486
126	NM_207174	ABCG1	1.82942	0.159247
127	NM_004915	ABCG1	1.50959	0.184015
128	NM_207628	ABCG1	1.2786	0.206699
129	NM_207627	ABCG1	1.08111	0.229532
130	NM_004827	ABCG2	1.34904	0.0142415
131	NM_001257386	ABCG2	1.33448	0.279688
132	NM_022169	ABCG4	1.00162	0.798038
133	NM_001142505	ABCG4	1.01773	0.852429
134	NM_022436	ABCG5	1.23523	0.138553
135	NM_032604	ABHD1	1.03382	0.915108
136	NM_018394	ABHD10	1.40103	0.0581708
137	NR_026912	ABHD11	0.597694	0.125883
138	NR_026910	ABHD11	0.295708	0.138935
139	NM_148912	ABHD11	0.334341	0.144986
140	NM_148913	ABHD11	0.454126	0.342878
141	NM_001145364	ABHD11	0.82205	0.76294
142	NR_026690	ABHD11-AS1	1.46398	0.364366
143	NM_015600	ABHD12	1.15524	0.588684
144	NM_001042472	ABHD12	1.02435	0.833757
145	NM_001206673	ABHD12B	0.999786	0.599357
146	NM_181814	ABHD12B	0.890156	0.677223
147	NM_032859	ABHD13	1.23435	0.296579
148	NM_015407	ABHD14A	1.16452	0.496772
149	NR_037192	ABHD14A-ACY1	1.67913	0.297434
150	NM_032750	ABHD14B	1.19167	0.723635
151	NM_001146314	ABHD14B	0.85105	0.737331
152	NM_001254753	ABHD14B	0.756473	0.818964
153	NM_198147	ABHD15	0.580425	0.069962
154	NM_021160.2	ABHD16A	0.689805	0.0977635
155	NM_001177515.6	ABHD16A	0.627907	0.168884
156	NR_033489.5	ABHD16A	1.93501	0.417541
157	NR_033488.3	ABHD16A	0.68118	0.488319
158	NM_080622	ABHD16B	1.37532	0.135922
159	NM_152924	ABHD2	0.923988	0.473208
160	NM_007011	ABHD2	1.07645	0.615582
161	NM_138340	ABHD3	0.756691	0.0147748
162	NM_022060	ABHD4	0.968446	0.924192
163	NM_016006	ABHD5	1.61043	0.410464
164	NM_020676	ABHD6	1.46895	0.0100465
165	NM_024527	ABHD8	0.818999	0.379997
166	NM_001178121	ABI1	0.446588	0.049612
167	NM_001178122	ABI1	1.64166	0.314198
168	NM_001178120	ABI1	0.613872	0.344233
169	NM_005470	ABI1	1.48975	0.373901
170	NM_001012752	ABI1	1.2182	0.38932
171	NM_001012751	ABI1	0.660449	0.453365
172	NM_001012750	ABI1	1.41546	0.511375
173	NM_001178125	ABI1	0.883479	0.536994
174	NM_001178123	ABI1	0.92181	0.593041
175	NM_001178116	ABI1	0.903233	0.604851
176	NM_001178119	ABI1	1.24742	0.629709
177	NM_001178124	ABI1	0.988093	0.975263
178	NM_005759	ABI2	0.838455	0.09027
179	NM_001135186	ABI3	1.26508	0.0546703
180	NM_016428	ABI3	1.17589	0.0594885
181	NM_015429	ABI3BP	2.00115	0.145819
182	NM_007313	ABL1	0.339887	0.00599876
183	NM_005157	ABL1	0.50706	0.00876117
184	NM_001168237	ABL2	1.21097	0.319778
185	NM_007314	ABL2	1.20626	0.325815
186	NM_001168236	ABL2	1.19509	0.33033
187	NM_001168238	ABL2	1.19358	0.39059
188	NM_001136000	ABL2	1.13701	0.512588
189	NM_005158	ABL2	1.14916	0.640646
190	NM_001168239	ABL2	1.06401	0.715735
191	NM_001136001	ABL2	1.04448	0.8583
192	NM_001003408	ABLIM1	1.20896	0.456968
193	NM_002313	ABLIM1	0.782589	0.654384
194	NM_006720	ABLIM1	1.08856	0.705099
195	NM_001003407	ABLIM1	0.880302	0.822898
196	NM_001130083	ABLIM2	0.999841	0.373901
197	NM_001130084	ABLIM2	0.99937	0.373901
198	NM_001130085	ABLIM2	0.996818	0.373901
199	NM_001130086	ABLIM2	0.994491	0.373901
200	NM_001130087	ABLIM2	0.981925	0.373901
201	NM_032432	ABLIM2	0.97246	0.373901
202	NM_001130088	ABLIM2	1.07893	0.373901
203	NM_014945	ABLIM3	10.7891	4.01482e-05
204	NM_020469	ABO	1.01062	0.94966
205	NM_001091	ABP1	2.01584	0.0330063
206	NR_046393	ABR	1.46092	0.352869
207	NM_001092	ABR	1.22883	0.415285
208	NM_021962	ABR	1.74765	0.445989
209	NM_001159746	ABR	1.27829	0.556425
210	NM_001256847	ABR	1.17074	0.863499
211	NM_139166	ABRA	1.00847	0.964621
212	NM_021243	ABRACL	1.04668	0.851701
213	NM_013375	ABT1	0.849068	0.389977
214	NR_033429	ABTB1	5.31536	0.0126174
215	NM_032548	ABTB1	1.90656	0.29089
216	NM_172027	ABTB1	1.93181	0.330159
217	NM_145804	ABTB2	2.85351	0.0185204
218	NM_001607	ACAA1	0.568419	0.0537395
219	NR_024024	ACAA1	1.5655	0.214086
220	NM_001130410	ACAA1	0.764901	0.542629
221	NM_006111	ACAA2	1.35239	0.1131
222	NM_198837	ACACA	0.733174	0.285626
223	NM_198838	ACACA	0.693573	0.308796
224	NM_198836	ACACA	0.815378	0.35666
225	NM_198839	ACACA	1.14539	0.503486
226	NM_198834	ACACA	1.13152	0.720586
227	NM_001093	ACACB	0.613691	0.277858
228	NM_001136538	ACAD10	1.99383	0.137101
229	NM_025247	ACAD10	0.87959	0.713155
230	NM_032169	ACAD11	1.00402	0.980237
231	NM_014384	ACAD8	0.920627	0.692699
232	NM_014049	ACAD9	0.880357	0.239126
233	NR_033426	ACAD9	0.87757	0.690662
234	NM_000016	ACADM	0.538468	0.0393622
235	NM_001127328	ACADM	1.3409	0.664084
236	NM_000017	ACADS	0.594714	0.0954086
237	NM_001609	ACADSB	0.649936	0.00802306
238	NM_001270448	ACADVL	1.61346	0.0386607
239	NM_001033859	ACADVL	1.6802	0.270812
240	NM_000018	ACADVL	0.658625	0.403304
241	NM_001270447	ACADVL	1.06488	0.546406
242	NM_001135	ACAN	1.07351	0.131918
243	NM_013227	ACAN	1.01378	0.137337
244	NM_014716	ACAP1	1.16174	0.457173
245	NM_012287	ACAP2	1.03971	0.769965
246	NM_030649	ACAP3	1.35408	0.174735
247	NM_000019	ACAT1	0.692312	0.120628
248	NM_005891	ACAT2	0.429172	0.000374155
249	NM_022735	ACBD3	1.56468	0.0276874
250	NM_001135706	ACBD4	0.228271	0.0250304
251	NM_001135707	ACBD4	0.468614	0.0453567
252	NM_024722	ACBD4	0.440115	0.0759005
253	NM_001135705	ACBD4	3.2029	0.0759488
254	NM_001135704	ACBD4	0.66327	0.374809
255	NM_001042473	ACBD5	0.668494	0.137773
256	NR_073197	ACBD5	1.29782	0.187438
257	NM_145698	ACBD5	0.474578	0.195714
258	NR_073196	ACBD5	0.5389	0.24018
259	NR_073195	ACBD5	1.25975	0.724064
260	NR_024150	ACBD5	1.08883	0.890768
261	NM_001271512	ACBD5	0.985986	0.979002
262	NM_032360	ACBD6	0.770679	0.12703
263	NM_001039844	ACBD7	0.489058	0.167222
264	NM_032592	ACCS	3.58321	0.235624
265	NM_001127219	ACCS	0.830793	0.823979
266	NM_001031854	ACCSL	0.843049	0.373901
267	NM_001082486	ACD	0.410091	0.0182838
268	NM_022914	ACD	1.32673	0.686055
269	NM_001082487	ACD	1.23394	0.848205
270	NM_000789	ACE	3.21785	0.0906755
271	NM_001178057	ACE	1.53669	0.280715
272	NM_152830	ACE	1.46024	0.340584
273	NM_021804	ACE2	1.05913	0.373901
274	NM_133492	ACER1	1.19008	0.373901
275	NM_001010887	ACER2	0.54706	0.155771
276	NM_018367	ACER3	1.01588	0.859664
277	NM_000665	ACHE	1.54013	0.361438
278	NM_015831	ACHE	0.871858	0.665326
279	NM_014977	ACIN1	1.57612	0.228417
280	NM_001164816	ACIN1	0.913228	0.685769
281	NM_001164814	ACIN1	0.835265	0.691835
282	NM_001164815	ACIN1	0.973013	0.900401
283	NM_001164817	ACIN1	0.989347	0.9442
284	NM_198830	ACLY	1.13454	0.461941
285	NM_001096	ACLY	1.09845	0.700948
286	NM_138326	ACMSD	0.948067	0.746579
287	NM_020186	ACN9	1.8431	0.0245587
288	NM_002197	ACO1	1.04231	0.562135
289	NM_001098	ACO2	0.742066	0.159016
290	NM_001037161	ACOT1	0.799692	0.373936
291	NM_147161	ACOT11	2.72651	0.00199333
292	NM_015547	ACOT11	0.994112	0.373901
293	NM_130767	ACOT12	1.01978	0.893197
294	NM_018473	ACOT13	0.909758	0.519245
295	NM_001160094	ACOT13	1.22197	0.599199
296	NM_006821	ACOT2	1.23766	0.0239397
297	NR_046028	ACOT2	1.02539	0.874129
298	NM_152331	ACOT4	1.55646	0.0304298
299	NM_001037162	ACOT6	0.734931	0.353713
300	NM_007274	ACOT7	0.486442	0.135551
301	NM_181865	ACOT7	0.651478	0.288561
302	NM_181866	ACOT7	0.790609	0.322053
303	NM_181864	ACOT7	1.20476	0.337549
304	NM_005469	ACOT8	1.05353	0.621177
305	NM_001033583	ACOT9	1.20343	0.4613
306	NM_001037171	ACOT9	0.925413	0.737494
307	NM_004035	ACOX1	0.667804	0.15859
308	NM_001185039	ACOX1	1.2537	0.40531
309	NM_007292	ACOX1	1.27371	0.496614
310	NM_003500	ACOX2	1.55405	0.225666
311	NM_001101667	ACOX3	1.23576	0.360757
312	NM_003501	ACOX3	1.12793	0.423735
313	NM_001142807	ACOXL	1.07388	0.58248
314	NM_007099	ACP1	1.41838	0.166049
315	NM_004300	ACP1	0.851653	0.655931
316	NR_024080	ACP1	1.17261	0.729288
317	NM_001040649	ACP1	1.04429	0.940391
318	NM_001131064	ACP2	1.49367	0.649505
319	NM_001610	ACP2	1.01438	0.929456
320	NM_001611	ACP5	8.50872	0.000594275
321	NM_001111034	ACP5	1.20754	0.1614
322	NM_001111035	ACP5	1.10671	0.162612
323	NM_001111036	ACP5	1.78366	0.162617
324	NM_016361	ACP6	0.321582	0.0257295
325	NM_001037172	ACPL2	3.6964	0.0846462
326	NM_152282	ACPL2	1.18055	0.726584
327	NM_001099	ACPP	1.62049	0.13998
328	NM_001134194	ACPP	1.88974	0.204414
329	NM_033068	ACPT	0.932811	0.694242
330	NM_001097	ACR	1.07026	0.373901
331	NM_032489	ACRBP	1.10683	0.62869
332	NM_052957	ACRC	0.976619	0.909107
333	NM_020069	ACRV1	0.509924	0.290737
334	NM_020107	ACRV1	0.918501	0.374695
335	NM_020108	ACRV1	0.640144	0.376129
336	NM_001612	ACRV1	1.34711	0.510951
337	NM_015162	ACSBG1	0.967557	0.841642
338	NM_001199377	ACSBG1	0.966088	0.850706
339	NM_030924	ACSBG2	0.86669	0.50182
340	NM_025149	ACSF2	2.10323	0.152504
341	NR_023316	ACSF3	0.26004	0.05106
342	NR_045666	ACSF3	1.5228	0.406625
343	NR_045667	ACSF3	1.34003	0.506385
344	NM_174917	ACSF3	0.916716	0.803703
345	NM_001127214	ACSF3	1.0921	0.879483
346	NM_001243279	ACSF3	1.03507	0.954112
347	NM_001995	ACSL1	1.36002	0.267402
348	NM_203372	ACSL3	0.725062	0.130797
349	NM_004457	ACSL3	0.80985	0.363321
350	NM_004458	ACSL4	1.84535	0.0396417
351	NM_022977	ACSL4	1.4114	0.174559
352	NM_016234	ACSL5	3.52524	0.109608
353	NM_203380	ACSL5	1.03189	0.598275
354	NM_203379	ACSL5	1.17516	0.682056
355	NM_001205251	ACSL6	1.19231	0.124808
356	NM_001205247	ACSL6	1.07102	0.138032
357	NM_001205248	ACSL6	1.03072	0.186694
358	NM_001205250	ACSL6	1.0285	0.186983
359	NM_001009185	ACSL6	1.02787	0.187066
360	NM_015256	ACSL6	1.02787	0.187066
361	NM_001010845	ACSM2A	0.999998	0.373933
362	NM_001105069	ACSM2B	0.950585	0.373901
363	NM_182617	ACSM2B	0.974746	0.373901
364	NM_202000	ACSM3	1.3749	0.405547
365	NM_005622	ACSM3	0.947329	0.856329
366	NM_001080454	ACSM4	1.11291	0.373901
367	NM_017888	ACSM5	1.32691	0.116382
368	NM_001252675	ACSS1	0.850353	0.689761
369	NM_001252677	ACSS1	0.999689	0.703574
370	NM_001252676	ACSS1	1.05883	0.871006
371	NM_032501	ACSS1	1.00495	0.986404
372	NM_001076552	ACSS2	1.69476	0.307792
373	NM_018677	ACSS2	1.61537	0.362895
374	NM_001242393	ACSS2	1.05536	0.951268
375	NM_024560	ACSS3	0.638735	0.276631
376	NM_001100	ACTA1	1.85452	0.497093
377	NM_001613	ACTA2	2.6958	0.0547899
378	NM_001141945	ACTA2	3.24013	0.258375
379	NM_001101	ACTB	1.22625	0.17857
380	NM_001017992	ACTBL2	4.95952	0.0221914
381	NM_005159	ACTC1	1.32339	0.0764728
382	NR_037688	ACTG1	2.86356	0.181608
383	NM_001614	ACTG1	0.925672	0.336068
384	NM_001199954	ACTG1	1.50653	0.403382
385	NR_024438	ACTG1P4	0.898868	0.746963
386	NM_001615	ACTG2	0.640325	0.55899
387	NM_001199893	ACTG2	0.763207	0.593008
388	NM_001024675	ACTL10	0.451101	0.0100005
389	NM_178042	ACTL6A	2.31351	0.168826
390	NM_004301	ACTL6A	0.684493	0.19838
391	NM_177989	ACTL6A	0.644506	0.505531
392	NM_006687	ACTL7A	1.15838	0.55529
393	NM_006686	ACTL7B	1.01153	0.950455
394	NM_030812	ACTL8	1.24453	0.254303
395	NM_178525	ACTL9	0.890788	0.373901
396	NM_001130004	ACTN1	2.47066	0.12488
397	NM_001130005	ACTN1	2.40212	0.248148
398	NM_001102	ACTN1	1.27847	0.36936
399	NR_073422	ACTN1-AS1	1.50447	0.155168
400	NM_001103	ACTN2	0.848269	0.157419
401	NM_001258371	ACTN3	1.00268	0.493549
402	NM_001104	ACTN3	1.00723	0.887102
403	NR_047663	ACTN3	1.00723	0.887102
404	NM_004924	ACTN4	0.928719	0.576067
405	NM_018477	ACTR10	1.11788	0.483251
406	NM_005736	ACTR1A	0.794387	0.00331297
407	NM_005735	ACTR1B	0.840689	0.507237
408	NM_001005386	ACTR2	1.9941	0.307049
409	NM_005722	ACTR2	1.08236	0.60846
410	NM_005721	ACTR3	1.21109	0.241974
411	NM_020445	ACTR3B	0.440087	0.147862
412	NR_073000	ACTR3B	1.24938	0.60494
413	NM_001040135	ACTR3B	1.51028	0.626555
414	NR_073001	ACTR3B	0.892789	0.886236
415	NR_045000	ACTR3BP5	0.778282	0.591262
416	NM_001164458	ACTR3C	1.01051	0.373901
417	NM_001164459	ACTR3C	1.11347	0.373901
418	NM_024855	ACTR5	0.893991	0.63145
419	NM_022496	ACTR6	1.49104	0.168486
420	NR_048569	ACTR6	0.8559	0.416036
421	NR_048568	ACTR6	0.520965	0.481567
422	NM_022899	ACTR8	1.02331	0.588635
423	NM_032487	ACTRT3	0.932806	0.769802
424	NM_001111067	ACVR1	2.04167	0.000311116
425	NM_001105	ACVR1	1.90033	0.0034234
426	NM_020328	ACVR1B	1.18829	0.129547
427	NM_020327	ACVR1B	1.13905	0.446334
428	NM_004302	ACVR1B	1.19332	0.525146
429	NM_001111032	ACVR1C	0.920627	0.037393
430	NM_001111033	ACVR1C	0.759754	0.0413553
431	NM_001111031	ACVR1C	1.0897	0.458375
432	NM_145259	ACVR1C	1.04036	0.533659
433	NM_001616	ACVR2A	0.73269	0.0553401
434	NM_001106	ACVR2B	0.750032	0.226338
435	NR_028389	ACVR2B-AS1	1.17212	0.589294
436	NM_001077401	ACVRL1	1.15664	0.0454312
437	NM_000020	ACVRL1	1.03105	0.051847
438	NM_000666	ACY1	0.486375	0.190739
439	NM_001198898	ACY1	1.92383	0.216336
440	NM_001198896	ACY1	0.747102	0.257747
441	NM_001198897	ACY1	1.30198	0.747678
442	NM_001198895	ACY1	1.25159	0.752041
443	NM_203488	ACYP1	0.250686	0.34728
444	NM_001107	ACYP1	0.882376	0.74327
445	NM_138448	ACYP2	1.23539	0.0830745
446	NM_000022	ADA	4.34703	0.00391549
447	NM_001159280	ADAL	0.571701	0.032301
448	NM_001012969	ADAL	0.704892	0.353427
449	NM_001110	ADAM10	1.58499	0.122551
450	NM_002390	ADAM11	0.931302	0.530554
451	NM_003474	ADAM12	1.72126	0.208271
452	NM_021641	ADAM12	1.66023	0.285112
453	NM_001261464	ADAM15	1.48421	0.134879
454	NR_048577	ADAM15	0.537214	0.189438
455	NM_001261465	ADAM15	2.22728	0.254825
456	NR_048578	ADAM15	0.646675	0.256576
457	NM_207194	ADAM15	1.81049	0.280828
458	NR_048579	ADAM15	0.616756	0.337714
459	NM_207196	ADAM15	0.863559	0.671114
460	NM_001261466	ADAM15	1.1877	0.717144
461	NM_207195	ADAM15	0.926791	0.739705
462	NM_207197	ADAM15	1.04783	0.758176
463	NM_003815	ADAM15	0.942887	0.785126
464	NM_207191	ADAM15	0.923963	0.807792
465	NM_003183	ADAM17	1.31391	0.476476
466	NM_001190956	ADAM18	1.14872	0.373901
467	NM_033274	ADAM19	1.10347	0.246782
468	NR_036636	ADAM1A	1.04346	0.807362
469	NM_003814	ADAM20	0.802816	0.0538543
470	NR_037933	ADAM20P1	1.09304	0.483607
471	NM_003813	ADAM21	1.97353	0.128548
472	NR_003951	ADAM21P1	1.24171	0.174419
473	NM_021723	ADAM22	0.949985	0.076744
474	NM_021722	ADAM22	0.944585	0.0767702
475	NM_016351	ADAM22	0.916118	0.0769153
476	NM_004194	ADAM22	0.99269	0.634917
477	NM_021721	ADAM22	0.95812	0.652518
478	NM_003812	ADAM23	0.245716	0.00103676
479	NM_014265	ADAM28	4.58439	0.0187456
480	NM_021777	ADAM28	1.71815	0.37421
481	NM_021794	ADAM30	0.907219	0.143858
482	NM_145004	ADAM32	0.8789	0.228566
483	NM_153202	ADAM33	1.12382	0.0111329
484	NM_025220	ADAM33	1.04053	0.0122094
485	NR_001448	ADAM5	1.12857	0.373901
486	NM_003817	ADAM7	0.974447	0.698549
487	NM_001164490	ADAM8	1.81743	0.114545
488	NM_001164489	ADAM8	1.07522	0.193321
489	NM_001109	ADAM8	0.872053	0.794764
490	NR_027878	ADAM9	2.07871	0.353072
491	NR_027639	ADAM9	1.85876	0.500902
492	NR_027638	ADAM9	1.9446	0.502798
493	NM_003816	ADAM9	0.857774	0.578473
494	NM_006988	ADAMTS1	7.47213	0.0360221
495	NM_030957	ADAMTS10	2.2685	0.119435
496	NM_030955	ADAMTS12	9.60582	0.00070281
497	NM_139026	ADAMTS13	0.920157	0.231111
498	NM_139027	ADAMTS13	0.968223	0.237948
499	NM_139025	ADAMTS13	1.29331	0.380271
500	NR_024514	ADAMTS13	0.982332	0.92472
501	NM_139155	ADAMTS14	14.4534	0.00252819
502	NM_080722	ADAMTS14	11.9246	0.00708566
503	NM_139055	ADAMTS15	0.549559	0.0234256
504	NM_139056	ADAMTS16	1.58115	0.15689
505	NM_139057	ADAMTS17	1.05092	0.730809
506	NM_199355	ADAMTS18	6.10255	0.00227302
507	NM_133638	ADAMTS19	1.08137	0.839768
508	NM_014244	ADAMTS2	7.77832	0.000117623
509	NM_021599	ADAMTS2	8.83133	0.000848566
510	NM_025003	ADAMTS20	1.38791	0.168879
511	NM_014243	ADAMTS3	11.6508	6.62322e-05
512	NM_005099	ADAMTS4	0.105779	0.00329217
513	NM_007038	ADAMTS5	4.96185	0.0441455
514	NM_197941	ADAMTS6	3.52579	0.167833
515	NM_014272	ADAMTS7	2.00013	0.0649431
516	NM_007037	ADAMTS8	0.942179	0.70721
517	NM_182920	ADAMTS9	3.61766	0.0195932
518	NR_038264	ADAMTS9-AS2	1.15184	0.628983
519	NM_001040272	ADAMTSL1	2.36531	0.00212044
520	NM_052866	ADAMTSL1	1.58811	0.375674
521	NM_014694	ADAMTSL2	1.09017	0.173263
522	NM_001145320	ADAMTSL2	1.00115	0.179179
523	NM_207517	ADAMTSL3	1.12041	0.0353001
524	NM_019032	ADAMTSL4	1.65351	0.154389
525	NM_025008	ADAMTSL4	1.17206	0.464231
526	NM_213604	ADAMTSL5	1.27671	0.424329
527	NM_006869	ADAP1	1.83588	0.028553
528	NM_018404	ADAP2	2.45269	0.00279716
529	NM_015840	ADAR	1.17171	0.200961
530	NM_015841	ADAR	1.2447	0.446275
531	NM_001025107	ADAR	0.927427	0.804464
532	NM_001111	ADAR	1.04302	0.884744
533	NM_001193495	ADAR	1.00788	0.975838
534	NM_001160230	ADARB1	1.42481	0.0426694
535	NR_027673	ADARB1	1.95281	0.249035
536	NM_001112	ADARB1	1.18445	0.324193
537	NM_015834	ADARB1	1.3265	0.50452
538	NM_015833	ADARB1	1.1456	0.567519
539	NR_027672	ADARB1	1.72192	0.573468
540	NR_027674	ADARB1	1.06793	0.715566
541	NR_073200	ADARB1	1.04516	0.904908
542	NM_018702	ADARB2	1.00187	0.959026
543	NM_012091	ADAT1	0.841361	0.658878
544	NR_036460	ADAT1	0.990761	0.956305
545	NM_182503	ADAT2	0.930618	0.781765
546	NM_138422	ADAT3	1.06098	0.805826
547	NM_052998	ADC	1.26507	0.737016
548	NM_001142545	ADCK1	2.10081	0.0425723
549	NM_020421	ADCK1	0.927781	0.643403
550	NM_052853	ADCK2	0.460372	0.0576578
551	NM_020247	ADCK3	0.735196	0.188378
552	NM_001142555	ADCK4	1.31502	0.554451
553	NM_024876	ADCK4	0.736236	0.597001
554	NM_174922	ADCK5	1.10933	0.704243
555	NM_021116	ADCY1	1.03992	0.434056
556	NM_001167749	ADCY10	0.84348	0.323685
557	NM_018417	ADCY10	0.997239	0.335148
558	NR_026938	ADCY10P1	1.1527	0.493298
559	NM_020546	ADCY2	1.00723	0.883126
560	NM_004036	ADCY3	0.641054	0.202465
561	NM_001198568	ADCY4	1.00021	0.373901
562	NM_001198592	ADCY4	1.01434	0.373901
563	NM_139247	ADCY4	1.01519	0.373901
564	NM_183357	ADCY5	1.20516	0.373568
565	NM_001199642	ADCY5	1.155	0.70576
566	NM_020983	ADCY6	1.19028	0.246604
567	NM_015270	ADCY6	0.866504	0.730946
568	NM_001114	ADCY7	1.57606	0.0236773
569	NM_001115	ADCY8	1.57417	0.0557134
570	NM_001116	ADCY9	0.938015	0.800387
571	NM_001099733	ADCYAP1	1.00595	0.882133
572	NM_001117	ADCYAP1	1.00889	0.884425
573	NM_001199637	ADCYAP1R1	1.12801	0.232218
574	NM_001118	ADCYAP1R1	1.08083	0.235731
575	NM_001199636	ADCYAP1R1	1.04446	0.238575
576	NM_001199635	ADCYAP1R1	1.04348	0.238653
577	NM_001119	ADD1	0.803962	0.426059
578	NM_014190	ADD1	0.867217	0.568013
579	NM_176801	ADD1	1.08415	0.84049
580	NM_014189	ADD1	1.00639	0.97762
581	NM_001617	ADD2	0.36593	0.0309759
582	NM_001185054	ADD2	0.4558	0.0468376
583	NM_001185055	ADD2	0.579297	0.0492439
584	NM_017482	ADD2	0.451639	0.0989081
585	NM_017488	ADD2	0.426851	0.176702
586	NM_016824	ADD3	0.750147	0.556625
587	NM_001121	ADD3	0.916115	0.869402
588	NM_019903	ADD3	0.961204	0.886326
589	NM_024694	ADGB	0.998332	0.955349
590	NM_000668	ADH1B	1	?
591	NM_000669	ADH1C	0.831861	0.14086
592	NM_000671	ADH5	1.1222	0.506898
593	NM_000672	ADH6	0.899229	0.574931
594	NM_001102470	ADH6	0.94669	0.709181
595	NM_144650	ADHFE1	1.22908	0.650353
596	NM_018269	ADI1	0.656227	0.0228004
597	NM_004797	ADIPOQ	1.09253	0.142517
598	NM_001177800	ADIPOQ	1.05378	0.14382
599	NR_046662	ADIPOQ-AS1	1.00245	0.975962
600	NR_046083	ADIPOR1	1.25562	0.535988
601	NM_015999	ADIPOR1	0.883254	0.599515
602	NM_024551	ADIPOR2	1.25771	0.038075
603	NM_001202450	ADK	1.12078	0.11429
604	NM_001202449	ADK	2.29537	0.473345
605	NM_001123	ADK	0.623193	0.487043
606	NM_006721	ADK	0.902699	0.737048
607	NM_001124	ADM	2.88589	6.64652e-05
608	NM_001253845	ADM2	0.693093	0.0764524
609	NM_024866	ADM2	0.965421	0.108393
610	NM_001101340	ADM5	0.609733	0.0407088
611	NM_181442	ADNP	1.00457	0.975771
612	NM_015339	ADNP	0.993652	0.983128
613	NM_014913	ADNP2	0.833191	0.0832543
614	NM_032804	ADO	0.855383	0.43064
615	NM_000674	ADORA1	0.468767	0.188756
616	NM_001048230	ADORA1	0.91063	0.763166
617	NM_000675	ADORA2A	1.64265	0.225578
618	NR_028483	ADORA2A-AS1	1.06197	0.764554
619	NR_028484	ADORA2A-AS1	1.15488	0.789762
620	NM_000676	ADORA2B	0.609259	0.000146784
621	NM_001081976	ADORA3	1.17959	0.373901
622	NM_000677	ADORA3	1.07415	0.606873
623	NM_020683	ADORA3	1	?
624	NR_023318	ADPGK	1.3537	0.200178
625	NR_023319	ADPGK	1.29693	0.42535
626	NM_031284	ADPGK	1.0348	0.88627
627	NR_040107	ADPGK-AS1	0.945328	0.761559
628	NM_001125	ADPRH	1.61461	0.111842
629	NM_199162	ADPRHL1	0.622416	0.02998
630	NM_138430	ADPRHL1	1.20908	0.733147
631	NM_017825	ADPRHL2	0.751905	0.0398672
632	NM_020233	ADPRM	1.08075	0.611938
633	NM_033303	ADRA1A	0.924793	0.373495
634	NM_000680	ADRA1A	0.999941	0.695434
635	NM_033302	ADRA1A	0.995292	0.698222
636	NM_033304	ADRA1A	0.965949	0.716096
637	NM_000679	ADRA1B	1.06142	0.750795
638	NM_000678	ADRA1D	0.584477	0.233606
639	NM_000681	ADRA2A	1.2227	0.118674
640	NM_000682	ADRA2B	0.929977	0.535124
641	NM_000684	ADRB1	0.925848	0.694372
642	NM_000024	ADRB2	1.99019	0.0533169
643	NM_000025	ADRB3	0.935128	0.373901
644	NM_001619	ADRBK1	0.743592	0.166092
645	NM_005160	ADRBK2	1.43716	0.0337112
646	NM_175573	ADRM1	0.907068	0.879011
647	NM_007002	ADRM1	0.982771	0.955094
648	NM_000026	ADSL	0.799233	0.275848
649	NM_001123378	ADSL	1.1677	0.754043
650	NM_001126	ADSS	0.914159	0.613086
651	NM_152328	ADSSL1	2.8272	0.0899359
652	NM_199165	ADSSL1	0.529034	0.298243
653	NM_001143948	ADTRP	1.09918	0.714505
654	NM_032744	ADTRP	1.12491	0.748979
655	NM_001129	AEBP1	0.889983	0.285884
656	NM_001114176	AEBP2	0.718246	0.596178
657	NM_001267043	AEBP2	0.724039	0.616457
658	NM_153207	AEBP2	1.06164	0.742827
659	NM_022767	AEN	0.682957	0.441597
660	NM_198969	AES	0.525437	0.0328667
661	NM_001130	AES	0.846986	0.660738
662	NM_198970	AES	0.95788	0.963542
663	NM_001134647	AFAP1	1.27067	0.28038
664	NM_198595	AFAP1	1.29134	0.326239
665	NR_026892	AFAP1-AS1	1.04626	0.851775
666	NM_152406	AFAP1L1	13.3937	0.0096221
667	NM_001146337	AFAP1L1	2.16676	0.18294
668	NM_001001936	AFAP1L2	4.98051	0.00126372
669	NM_032550	AFAP1L2	3.18054	0.0263143
670	NM_005935	AFF1	1.77162	0.018727
671	NM_001166693	AFF1	1.21782	0.490548
672	NM_001169124	AFF2	0.619229	0.12166
673	NM_001170628	AFF2	0.459955	0.156604
674	NM_002025	AFF2	0.874348	0.19098
675	NM_001169125	AFF2	0.573395	0.276708
676	NM_001169122	AFF2	0.689193	0.287669
677	NM_001169123	AFF2	0.748577	0.484588
678	NM_001025108	AFF3	2.3403	0.00475638
679	NM_002285	AFF3	1.87417	0.236912
680	NM_014423	AFF4	1.0013	0.993287
681	NR_003228	AFG3L1P	0.55159	0.243264
682	NR_003227	AFG3L1P	0.820199	0.484294
683	NR_003226	AFG3L1P	0.850379	0.523236
684	NM_006796	AFG3L2	0.78095	0.297721
685	NM_001145526	AFMID	0.85045	0.335905
686	NR_027083	AFMID	1.36259	0.489596
687	NM_001010982	AFMID	0.898198	0.66094
688	NM_001134	AFP	3.21044	0.0202169
689	NM_203437	AFTPH	2.3186	0.0365344
690	NM_001002243	AFTPH	2.06	0.055729
691	NM_017657	AFTPH	0.607969	0.0614508
692	NM_001171988	AGA	1.25866	0.715982
693	NM_000027	AGA	1.14966	0.753442
694	NR_033655	AGA	1.39804	0.794678
695	NM_014914	AGAP1	1.09465	0.464025
696	NM_001037131	AGAP1	1.11528	0.650959
697	NM_001244888	AGAP1	0.949508	0.856281
698	NM_133447	AGAP11	1.15607	0.66421
699	NM_014770	AGAP2	1.28312	0.477117
700	NM_001122772	AGAP2	0.820743	0.639668
701	NM_001042535	AGAP3	0.793544	0.36364
702	NM_031946	AGAP3	0.957486	0.614497
703	NM_133446	AGAP4	1.08729	0.6437
704	NM_001144000	AGAP5	0.939861	0.874005
705	NM_001077665	AGAP6	1.03383	0.823702
706	NM_001077685	AGAP7	1.90801	0.568986
707	NM_001077686	AGAP8	0.963043	0.935005
708	NM_001190810.1	AGAP9	1.59124	0.0427617
709	NM_001190810	AGAP9	0.929329	0.937692
710	NM_152336	AGBL1	1.05935	0.373901
711	NM_024783	AGBL2	0.892916	0.790693
712	NM_178563	AGBL3	0.99869	0.996063
713	NM_032785	AGBL4	1.24875	0.0603848
714	NM_021831	AGBL5	0.87291	0.57826
715	NM_001035507	AGBL5	0.922023	0.811285
716	NR_038190.1	AGER	0.405561	0.127107
717	NM_001206966	AGER	1.39626	0.158982
718	NM_001206934	AGER	2.42807	0.178178
719	NM_001206954.1	AGER	1.39085	0.245167
720	NM_001206940.5	AGER	1.07019	0.271286
721	NM_001136.5	AGER	1.01354	0.366541
722	NM_001206936	AGER	1.29965	0.36813
723	NM_172197.5	AGER	0.652324	0.3842
724	NM_001206932	AGER	1.00275	0.394778
725	NM_001206929.5	AGER	0.740087	0.594128
726	NM_004504	AGFG1	0.734263	0.112181
727	NM_001135188	AGFG1	1.22151	0.263626
728	NM_001135187	AGFG1	1.79254	0.33815
729	NM_001135189	AGFG1	1.04053	0.962781
730	NM_006076	AGFG2	0.972912	0.519135
731	NM_018046	AGGF1	0.960059	0.667995
732	NM_018238	AGK	0.854988	0.306879
733	NM_000642	AGL	0.765597	0.612458
734	NM_000028	AGL	0.929919	0.67922
735	NM_000645	AGL	0.906901	0.725666
736	NM_000643	AGL	0.875339	0.728864
737	NM_000646	AGL	0.835536	0.758004
738	NM_000644	AGL	0.907337	0.839764
739	NM_024758	AGMAT	1.27851	0.406846
740	NM_001004320	AGMO	4.00866	0.00380508
741	NM_006411.6	AGPAT1	0.757304	0.493269
742	NM_032741	AGPAT1	0.952056	0.914747
743	NM_006412	AGPAT2	0.918832	0.667135
744	NM_001012727	AGPAT2	1.08618	0.927011
745	NM_020132	AGPAT3	0.925971	0.778195
746	NM_001037553	AGPAT3	0.987082	0.932277
747	NM_020133	AGPAT4	0.982285	0.942321
748	NR_024277	AGPAT4-IT1	1.26177	0.477576
749	NM_018361	AGPAT5	0.89259	0.467123
750	NM_178819	AGPAT6	1.1725	0.46543
751	NM_001256421	AGPAT9	0.4885	0.199754
752	NM_032717	AGPAT9	0.520133	0.265775
753	NM_001256422	AGPAT9	0.624114	0.462506
754	NM_001083612	AGPHD1	0.388038	0.0991739
755	NM_001013619	AGPHD1	1.99301	0.116699
756	NM_003659	AGPS	0.614468	0.00277483
757	NM_006408	AGR2	0.985426	0.983054
758	NM_176813	AGR3	1.25875	0.373901
759	NM_198576	AGRN	1.26714	0.40921
760	NR_026811.1	AGSK1	1.79188	0.492547
761	NR_026811	AGSK1	0.760367	0.59155
762	NR_026811.2	AGSK1	1.36279	0.662725
763	NM_000029	AGT	26.2383	0.000257312
764	NM_015239	AGTPBP1	0.639032	0.0150199
765	NM_032049	AGTR1	5.89617	0.0175217
766	NM_009585	AGTR1	3.9884	0.024762
767	NM_004835	AGTR1	2.49763	0.0664974
768	NM_000685	AGTR1	3.29423	0.0886755
769	NM_031850	AGTR1	2.05758	0.0960573
770	NM_001040197	AGTRAP	2.48555	0.0164077
771	NM_020350	AGTRAP	3.07132	0.0402285
772	NM_001040195	AGTRAP	1.84952	0.605756
773	NM_001040196	AGTRAP	1.10252	0.832703
774	NM_001040194	AGTRAP	1.12903	0.840677
775	NM_031900	AGXT2	1.1003	0.449133
776	NR_027474	AGXT2L1	0.968165	0.332866
777	NM_031279	AGXT2L1	0.606255	0.349687
778	NM_001146590	AGXT2L1	0.965687	0.654536
779	NR_027475	AGXT2L1	0.92274	0.863489
780	NM_001146627	AGXT2L1	0.95102	0.883494
781	NM_153373	AGXT2L2	1.69449	0.0534611
782	NM_015446	AHCTF1	0.954989	0.550542
783	NM_000687	AHCY	0.733409	0.0834771
784	NM_001161766	AHCY	1.06212	0.880104
785	NM_006621	AHCYL1	0.630798	0.27328
786	NM_001242674	AHCYL1	0.78649	0.483097
787	NM_001242676	AHCYL1	1.27575	0.538815
788	NM_001242675	AHCYL1	0.95569	0.870481
789	NM_001242673	AHCYL1	1.00274	0.993775
790	NM_001130720	AHCYL2	1.50345	0.171717
791	NM_015328	AHCYL2	1.3224	0.418275
792	NM_001130723	AHCYL2	1.16466	0.509055
793	NM_001130722	AHCYL2	0.966407	0.920094
794	NM_001029882	AHDC1	1.90471	0.148135
795	NM_001134831	AHI1	2.00146	0.126314
796	NM_017651	AHI1	1.27397	0.288414
797	NM_001134832	AHI1	1.86599	0.434299
798	NM_001134830	AHI1	1.0654	0.801798
799	NM_024060	AHNAK	0.661469	0.0663009
800	NM_001620	AHNAK	0.862158	0.415228
801	NM_138420	AHNAK2	0.705451	0.417878
802	NM_001621	AHR	1.01388	0.96915
803	NM_020731	AHRR	1.76034	0.0373078
804	NM_001242412	AHRR	1.22677	0.583228
805	NM_012111	AHSA1	0.763724	0.0797314
806	NM_152392	AHSA2	1.42389	0.345507
807	NM_001622	AHSG	0.780183	0.339153
808	NM_020661	AICDA	1.03564	0.373901
809	NM_022831	AIDA	1.03804	0.876504
810	NM_004847.3	AIF1	1.10882	0.373901
811	NM_032955.2	AIF1	0.751512	0.373901
812	NM_001623.3	AIF1	0.675887	0.415341
813	NM_031426	AIF1L	0.0789831	0.000762191
814	NM_001185096	AIF1L	0.245972	0.00461969
815	NR_033701	AIF1L	0.167045	0.00653642
816	NM_001185095	AIF1L	0.288448	0.01617
817	NM_004208	AIFM1	0.734294	0.0519882
818	NM_001130847	AIFM1	1.42134	0.595861
819	NM_145812	AIFM1	0.808518	0.772285
820	NM_001130846	AIFM1	1.12905	0.807213
821	NM_145813	AIFM1	1.21505	0.865205
822	NM_001198696	AIFM2	0.758198	0.306739
823	NM_032797	AIFM2	0.833189	0.325999
824	NM_001146288	AIFM3	0.996287	0.622147
825	NM_144704	AIFM3	0.98677	0.633137
826	NM_001018060	AIFM3	0.980295	0.641196
827	NR_027464	AIFM3	0.958811	0.672623
828	NM_016108	AIG1	0.727393	0.141063
829	NM_001624	AIM1	0.394574	0.00756974
830	NM_001039775	AIM1L	1.56221	0.05088
831	NM_004833	AIM2	2.77137	0.00325433
832	NM_001142416	AIMP1	0.594214	0.146259
833	NM_004757	AIMP1	1.53623	0.146392
834	NM_001142415	AIMP1	2.26086	0.235688
835	NM_006303	AIMP2	0.781092	0.351915
836	NM_003977	AIP	1.15125	0.339812
837	NM_001033054	AIPL1	0.900613	0.156121
838	NM_001033055	AIPL1	0.913774	0.156857
839	NM_014336	AIPL1	0.995749	0.161482
840	NM_000383	AIRE	1.09818	0.373901
841	NR_047514	AIRN	0.917965	0.116204
842	NM_001042478	AJAP1	4.71021	0.0651663
843	NM_018836	AJAP1	4.60099	0.105839
844	NM_032876	AJUBA	0.556188	0.0926746
845	NM_198086	AJUBA	0.408367	0.508099
846	NM_000476	AK1	0.795172	0.0300437
847	NM_013411	AK2	0.722471	0.0426952
848	NR_037592	AK2	1.38137	0.228483
849	NM_001625	AK2	1.09251	0.320201
850	NM_001199199	AK2	2.04671	0.408624
851	NR_037591	AK2	0.869932	0.63536
852	NM_001199856	AK3	0.600637	0.469509
853	NM_001199853	AK3	0.743701	0.74249
854	NM_001199855	AK3	0.766986	0.762213
855	NM_016282	AK3	0.852361	0.786106
856	NM_001199852	AK3	1.11956	0.866978
857	NM_013410	AK4	1.65122	0.200814
858	NM_203464	AK4	1.32117	0.408053
859	NM_001005353	AK4	1.18862	0.651472
860	NM_174858	AK5	0.425992	0.159385
861	NM_012093	AK5	0.903102	0.371298
862	NM_152327	AK7	0.946667	0.373901
863	NM_152572	AK8	0.85438	0.444731
864	NM_003488	AKAP1	0.817825	0.421872
865	NM_001242902	AKAP1	0.90155	0.595839
866	NM_001242903	AKAP1	0.941395	0.660984
867	NM_007202	AKAP10	0.931795	0.636766
868	NM_016248	AKAP11	1.33135	0.0612982
869	NM_144497	AKAP12	0.654438	0.0954835
870	NM_005100	AKAP12	0.740998	0.410818
871	NM_001270546	AKAP13	0.931731	0.805631
872	NM_007200	AKAP13	1.07472	0.931535
873	NM_006738	AKAP13	1.04459	0.947048
874	NM_001008535	AKAP14	0.834891	0.373901
875	NM_001008534	AKAP14	1	?
876	NM_178813	AKAP14	1	?
877	NM_005088	AKAP17A	0.690515	0.00662085
878	NM_005088.1	AKAP17A	0.690515	0.00662085
879	NR_027383	AKAP17A	1.91117	0.0742655
880	NR_027383.1	AKAP17A	1.91117	0.0742655
881	NM_001198656	AKAP2	1.43488	0.125433
882	NM_001136562	AKAP2	1.15447	0.564698
883	NM_001004065	AKAP2	1.07562	0.794358
884	NM_006422	AKAP3	0.937814	0.779642
885	NM_004857	AKAP5	0.442145	0.00116359
886	NM_004274	AKAP6	0.431084	0.0479441
887	NM_016377	AKAP7	0.460473	0.0140666
888	NM_138633	AKAP7	1.12349	0.409322
889	NM_004842	AKAP7	1.36302	0.424427
890	NM_005858	AKAP8	1.04777	0.64215
891	NM_014371	AKAP8L	1.08779	0.292364
892	NM_005751	AKAP9	0.907358	0.663508
893	NM_147185	AKAP9	1.02729	0.859115
894	NM_001145128	AKD1	0.804544	0.0721077
895	NM_145025	AKD1	0.870259	0.652049
896	NR_045417	AKIP1	0.625971	0.0356078
897	NM_001206648	AKIP1	2.75445	0.0526475
898	NM_001206647	AKIP1	3.13918	0.162647
899	NM_020642	AKIP1	0.738006	0.216097
900	NR_045418	AKIP1	0.768031	0.398527
901	NM_001206646	AKIP1	0.937874	0.896443
902	NM_024595	AKIRIN1	1.22858	0.102785
903	NM_001136275	AKIRIN1	1.4675	0.577443
904	NM_018064	AKIRIN2	0.73033	0.0579325
905	NM_030767	AKNA	0.790219	0.407554
906	NM_152763	AKNAD1	0.952293	0.491649
907	NR_049760	AKNAD1	0.739775	0.502514
908	NM_001202413	AKR1A1	1.84872	0.0183024
909	NM_001202414	AKR1A1	1.97761	0.0778542
910	NM_153326	AKR1A1	0.728343	0.361295
911	NM_006066	AKR1A1	0.825213	0.548937
912	NM_001628	AKR1B1	1.3361	0.300064
913	NM_020299	AKR1B10	0.911498	0.759227
914	NM_001080538	AKR1B15	1.17167	0.373901
915	NM_001353	AKR1C1	13.0072	0.00380812
916	NM_205845	AKR1C2	3.60786	0.0194225
917	NM_001354	AKR1C2	1.73495	0.0513183
918	NM_001135241	AKR1C2	3.38349	0.127625
919	NM_003739	AKR1C3	2.61046	0.184251
920	NM_001253909	AKR1C3	1.22064	0.373901
921	NM_001253908	AKR1C3	1.73503	0.488752
922	NM_001818	AKR1C4	0.855862	0.373901
923	NR_027916	AKR1CL1	1.14491	0.15767
924	NM_005989	AKR1D1	1.00108	0.894471
925	NM_001190907	AKR1D1	1.00485	0.897399
926	NM_001190906	AKR1D1	1.00967	0.901221
927	NM_003689	AKR7A2	0.747389	0.106804
928	NR_002796	AKR7A2P1	0.643054	0.318477
929	NM_012067	AKR7A3	1.01975	0.955824
930	NR_040288	AKR7L	2.07573	0.0655336
931	NR_040289	AKR7L	0.87127	0.797431
932	NM_005163	AKT1	0.610754	0.155118
933	NM_001014432	AKT1	0.714332	0.1663
934	NM_001014431	AKT1	0.957398	0.774058
935	NM_001098633	AKT1S1	1.0936	0.674872
936	NM_032375	AKT1S1	0.92784	0.813131
937	NM_001098632	AKT1S1	0.938279	0.886175
938	NM_001243028	AKT2	0.760892	0.0903693
939	NM_001243027	AKT2	1.39286	0.396052
940	NM_001626	AKT2	0.796235	0.494151
941	NM_005465	AKT3	1.05863	0.625603
942	NM_181690	AKT3	1.00004	0.806854
943	NM_001206729	AKT3	1.00466	0.810033
944	NM_022476	AKTIP	0.509434	0.0186794
945	NM_001012398	AKTIP	0.731302	0.470001
946	NM_000031	ALAD	0.730609	0.163211
947	NM_199166	ALAS1	0.845434	0.0926796
948	NM_000688	ALAS1	0.846707	0.717351
949	NM_000032	ALAS2	0.999744	0.95422
950	NM_001037968	ALAS2	0.999718	0.954238
951	NM_001037967	ALAS2	0.996252	0.957054
952	NM_000477	ALB	1.40157	0.245951
953	NM_001243281	ALCAM	2.09296	0.103517
954	NM_001243280	ALCAM	1.86337	0.24116
955	NM_001627	ALCAM	1.14876	0.519947
956	NM_001243283	ALCAM	1.15838	0.537536
957	NM_153329	ALDH16A1	0.545037	0.0751051
958	NM_001145396	ALDH16A1	1.14282	0.584935
959	NM_002860	ALDH18A1	1.12842	0.466543
960	NM_001017423	ALDH18A1	1.203	0.492617
961	NM_000689	ALDH1A1	19.7152	0.000776745
962	NM_170697	ALDH1A2	0.752767	0.17556
963	NM_170696	ALDH1A2	0.993722	0.195236
964	NM_001206897	ALDH1A2	0.999663	0.195633
965	NM_003888	ALDH1A2	0.998731	0.195664
966	NM_000693	ALDH1A3	0.27682	0.0340913
967	NM_000692	ALDH1B1	0.720544	0.155296
968	NM_001270364	ALDH1L1	1.01748	0.000145913
969	NM_012190	ALDH1L1	1.00362	0.000149825
970	NR_072979	ALDH1L1	1.1318	0.116848
971	NM_001270365	ALDH1L1	1.28092	0.120378
972	NR_046383	ALDH1L1-AS2	0.988201	0.942539
973	NR_027752	ALDH1L2	1.72966	0.00624334
974	NM_001034173	ALDH1L2	1.90879	0.00649672
975	NM_000690	ALDH2	1.2877	0.670306
976	NM_001204889	ALDH2	1.46355	0.670704
977	NM_001135168	ALDH3A1	0.980012	0.00456864
978	NM_001135167	ALDH3A1	0.507165	0.00994034
979	NM_000691	ALDH3A1	1.01321	0.981839
980	NM_000382	ALDH3A2	0.767531	0.148102
981	NM_001031806	ALDH3A2	0.877873	0.567788
982	NM_000694	ALDH3B1	0.482444	0.0515466
983	NM_001161473	ALDH3B1	0.636524	0.213405
984	NM_001030010	ALDH3B1	0.660055	0.260934
985	NM_000695	ALDH3B2	0.954202	0.561631
986	NM_001031615	ALDH3B2	0.847391	0.786639
987	NM_003748	ALDH4A1	0.23654	0.0312129
988	NM_170726	ALDH4A1	0.981761	0.456576
989	NM_001161504	ALDH4A1	0.587394	0.573521
990	NM_001080	ALDH5A1	0.232931	0.000380084
991	NM_170740	ALDH5A1	0.368885	0.00788293
992	NM_005589	ALDH6A1	0.364448	0.0226442
993	NM_001202404	ALDH7A1	0.612425	0.363312
994	NM_001182	ALDH7A1	1.15635	0.781608
995	NM_001201377	ALDH7A1	1.15635	0.781608
996	NM_001193480	ALDH8A1	1.79209	0.194655
997	NM_170771	ALDH8A1	0.731713	0.370527
998	NM_022568	ALDH8A1	1.03308	0.54059
999	NM_000696	ALDH9A1	0.994202	0.951752
1000	NM_000034	ALDOA	0.503283	0.0504303
1001	NM_184043	ALDOA	0.519201	0.0580784
1002	NM_001243177	ALDOA	0.625994	0.26398
1003	NM_001127617	ALDOA	0.566871	0.337135
1004	NM_184041	ALDOA	1.01001	0.961321
1005	NM_000035	ALDOB	1.06975	0.668746
1006	NM_005165	ALDOC	0.798195	0.790093
1007	NM_019109	ALG1	1.02322	0.898889
1008	NM_032834	ALG10	0.872015	0.457075
1009	NM_001013620	ALG10B	0.969294	0.866568
1010	NM_001004127	ALG11	1.79848	0.0648457
1011	NR_036571	ALG11	0.622642	0.373901
1012	NM_024105	ALG12	1.27098	0.236371
1013	NM_001257234	ALG13	0.545227	0.0399633
1014	NM_001257235	ALG13	0.504634	0.130979
1015	NM_001257230	ALG13	0.578809	0.133475
1016	NR_033125	ALG13	0.930599	0.30464
1017	NM_001257237	ALG13	1.4116	0.330115
1018	NM_001257239	ALG13	2.26761	0.382902
1019	NM_001099922	ALG13	1.41962	0.51685
1020	NM_001257231	ALG13	1.42937	0.697603
1021	NM_001039210	ALG13	1.15113	0.714541
1022	NM_018466	ALG13	1.11043	0.817003
1023	NM_001168385	ALG13	0.93827	0.876793
1024	NM_001257241	ALG13	1.11661	0.911462
1025	NM_001257240	ALG13	0.943064	0.926999
1026	NM_144988	ALG14	0.891266	0.472426
1027	NM_001195223	ALG1L	1.20011	0.360399
1028	NM_001015050	ALG1L	1.28058	0.703328
1029	NM_001136152	ALG1L2	1.51544	0.559028
1030	NR_073386	ALG1L9P	1.51408	0.273672
1031	NR_073387	ALG1L9P	1.04436	0.373901
1032	NR_073388	ALG1L9P	1.71805	0.396248
1033	NR_024532	ALG2	1.07306	0.688017
1034	NM_033087	ALG2	0.9509	0.748841
1035	NR_024534	ALG3	0.573509	0.0389399
1036	NM_005787	ALG3	1.50003	0.0822655
1037	NM_001006941	ALG3	1.38094	0.124297
1038	NR_024533	ALG3	1.43018	0.680955
1039	NM_001142364	ALG5	1.59207	0.683206
1040	NM_013338	ALG5	1.01996	0.936178
1041	NM_013339	ALG6	0.928264	0.536476
1042	NM_001007027	ALG8	3.95554	0.170832
1043	NM_024079	ALG8	0.95724	0.698497
1044	NM_001077691	ALG9	1.20877	0.497007
1045	NM_001077690	ALG9	0.889085	0.579421
1046	NM_024740	ALG9	1.1191	0.738407
1047	NM_001077692	ALG9	0.985387	0.972922
1048	NM_004304	ALK	1.22984	0.0924208
1049	NM_006020	ALKBH1	1.03758	0.75334
1050	NM_001145375	ALKBH2	2.06032	0.178415
1051	NM_001205179	ALKBH2	3.07694	0.183762
1052	NM_001145374	ALKBH2	0.757824	0.369833
1053	NM_001001655	ALKBH2	0.70117	0.549032
1054	NM_001205180	ALKBH2	1.07258	0.948777
1055	NM_139178	ALKBH3	0.997078	0.987563
1056	NM_017621	ALKBH4	0.896778	0.526659
1057	NM_017758	ALKBH5	1.03831	0.574614
1058	NM_198867	ALKBH6	0.331335	0.225931
1059	NM_032878	ALKBH6	1.22174	0.509323
1060	NM_032306	ALKBH7	0.802635	0.323646
1061	NM_138775	ALKBH8	1.03607	0.879198
1062	NM_018436	ALLC	0.951781	0.725607
1063	NM_015120	ALMS1	0.704436	0.121159
1064	NR_003683	ALMS1P	0.932587	0.701675
1065	NM_000697	ALOX12	1.66136	0.0287813
1066	NM_001139	ALOX12B	0.931881	0.373901
1067	NR_002710	ALOX12P2	2.31272	0.0401402
1068	NM_001140	ALOX15	1.01565	0.889809
1069	NM_001039131	ALOX15B	0.886831	0.373901
1070	NM_001141	ALOX15B	1.01142	0.448647
1071	NM_001039130	ALOX15B	1.05441	0.454239
1072	NM_000698	ALOX5	0.996467	0.373901
1073	NM_001256153	ALOX5	0.97706	0.373901
1074	NM_001256154	ALOX5	0.907505	0.373901
1075	NM_001629	ALOX5AP	4.98927	0.00576784
1076	NM_001204406	ALOX5AP	1	0.0136866
1077	NM_001165960	ALOXE3	0.972087	0.595939
1078	NM_021628	ALOXE3	0.889358	0.705024
1079	NM_025144	ALPK1	0.604205	0.341947
1080	NM_001102406	ALPK1	1.55864	0.392326
1081	NM_001253884	ALPK1	0.86631	0.841994
1082	NM_052947	ALPK2	0.802699	0.225086
1083	NM_020778	ALPK3	1.30186	0.401417
1084	NM_001177520	ALPL	2.41513	0.0404227
1085	NM_001127501	ALPL	1.13707	0.0676422
1086	NM_000478	ALPL	1.37852	0.457051
1087	NM_001632	ALPP	1.03194	0.798559
1088	NM_031313	ALPPL2	1.16128	0.592104
1089	NM_020919	ALS2	1.14064	0.108973
1090	NM_001135745	ALS2	0.929433	0.858798
1091	NR_033815	ALS2CL	1.1453	0.372226
1092	NM_182775	ALS2CL	1.14649	0.74321
1093	NM_001190707	ALS2CL	0.939709	0.864239
1094	NM_147129	ALS2CL	0.948197	0.925177
1095	NM_001168216	ALS2CR11	1.06407	0.373901
1096	NM_001168217	ALS2CR11	1.03071	0.373901
1097	NM_152525	ALS2CR11	1.00001	0.373902
1098	NM_001168221	ALS2CR11	0.970312	0.711536
1099	NM_139163	ALS2CR12	1.01405	0.882217
1100	NM_001127391	ALS2CR12	0.9996	0.99884
1101	NM_001104586	ALS2CR8	1.45467	0.316565
1102	NM_024744	ALS2CR8	1.00326	0.994127
1103	NM_006982	ALX1	1.19771	0.373901
1104	NM_006492	ALX3	1.22923	0.445293
1105	NM_021926	ALX4	16.9736	0.00241518
1106	NM_005782	ALYREF	0.645625	0.191665
1107	NM_014324	AMACR	0.309314	0.000311528
1108	NM_001167595	AMACR	1.09544	0.503897
1109	NM_203382	AMACR	1.11662	0.812
1110	NM_016519	AMBN	0.881051	0.272423
1111	NM_001633	AMBP	0.811059	0.493762
1112	NM_001267783	AMBRA1	0.896017	0.457921
1113	NM_017749	AMBRA1	0.857743	0.687922
1114	NM_001267782	AMBRA1	1.06681	0.819852
1115	NM_001634	AMD1	1.01542	0.891801
1116	NM_001033059	AMD1	1.02112	0.977371
1117	NM_152435	AMDHD1	0.490773	0.0929413
1118	NM_015944	AMDHD2	1.29755	0.236507
1119	NM_001145815	AMDHD2	1.50661	0.436504
1120	NM_152424	AMER1	0.513036	0.0112935
1121	NM_152698	AMER3	1.00138	0.878621
1122	NM_001105193	AMER3	1.00156	0.878763
1123	NM_001105194	AMER3	1.00258	0.879541
1124	NM_001105195	AMER3	1.00264	0.879587
1125	NM_001144	AMFR	0.956332	0.279615
1126	NM_000479	AMH	1.01759	0.94239
1127	NM_020547	AMHR2	0.999968	0.360039
1128	NM_001164690	AMHR2	0.999964	0.360052
1129	NM_001164691	AMHR2	0.895195	0.370959
1130	NM_153206	AMICA1	0.999608	0.707612
1131	NM_001098526	AMICA1	0.940381	0.796494
1132	NM_020703	AMIGO1	0.538569	0.03432
1133	NM_001143668	AMIGO2	1.69294	0.305268
1134	NM_181847	AMIGO2	1.18687	0.833038
1135	NM_198722	AMIGO3	1.07524	0.74971
1136	NM_001025580	AMMECR1	1.42966	0.524203
1137	NM_001171689	AMMECR1	1.12775	0.583766
1138	NM_015365	AMMECR1	1.0056	0.984947
1139	NM_001199140	AMMECR1L	1.18681	0.257951
1140	NM_031445	AMMECR1L	0.91649	0.696164
1141	NM_030943	AMN	1.04724	0.739205
1142	NR_004854	AMN1	3.24053	0.0605865
1143	NM_001113402	AMN1	0.808093	0.453859
1144	NM_133265	AMOT	0.141801	0.000253897
1145	NM_001113490	AMOT	0.122837	0.00638877
1146	NM_130847	AMOTL1	0.88629	0.638639
1147	NM_016201	AMOTL2	0.760166	0.268683
1148	NM_001172626	AMPD1	0.335031	0.196839
1149	NM_000036	AMPD1	0.374596	0.21126
1150	NM_139156	AMPD2	2.04251	0.155152
1151	NM_203404	AMPD2	1.9419	0.219816
1152	NM_001257361	AMPD2	1.57324	0.295493
1153	NM_004037	AMPD2	2.05748	0.305148
1154	NM_001257360	AMPD2	1.94026	0.306103
1155	NM_000480	AMPD3	1.29306	0.00272132
1156	NM_001172430	AMPD3	2.06709	0.0348722
1157	NM_001025389	AMPD3	2.60498	0.0381526
1158	NM_001172431	AMPD3	1.60158	0.508065
1159	NM_001025390	AMPD3	1.13858	0.849114
1160	NM_001635	AMPH	2.98603	0.0440461
1161	NM_139316	AMPH	1.82368	0.115401
1162	NM_001164711	AMT	0.429006	0.00225051
1163	NM_001164710	AMT	4.5489	0.0146667
1164	NM_001164712	AMT	0.855233	0.608328
1165	NR_028435	AMT	1.06288	0.819345
1166	NM_000481	AMT	1.041	0.849396
1167	NM_212557	AMTN	1.0944	0.373901
1168	NM_001008221.1	AMY1A	0.968332	0.82072
1169	NM_001008221.2	AMY1A	0.968332	0.82072
1170	NM_001008221	AMY1A	0.968332	0.82072
1171	NM_004038.1	AMY1A	1	?
1172	NM_004038	AMY1A	1	?
1173	NM_004038.2	AMY1A	1	?
1174	NM_001008218	AMY1B	1	?
1175	NM_001008218.1	AMY1B	1	?
1176	NM_001008218.2	AMY1B	1	?
1177	NM_001008219.1	AMY1C	1	?
1178	NM_001008219.2	AMY1C	1	?
1179	NM_001008219	AMY1C	1	?
1180	NM_000699	AMY2A	1	?
1181	NM_020978	AMY2B	0.681489	0.177879
1182	NM_133463	AMZ1	7.53873	0.00272177
1183	NM_001033569	AMZ2	0.715521	0.0182421
1184	NM_001033570	AMZ2	0.88569	0.634565
1185	NM_016627	AMZ2	0.849508	0.64751
1186	NM_001033572	AMZ2	0.887467	0.669967
1187	NM_001033571	AMZ2	0.912424	0.695847
1188	NM_001033574	AMZ2	0.968799	0.95487
1189	NR_026903	AMZ2P1	1.04238	0.880254
1190	NM_022662	ANAPC1	1.00068	0.993635
1191	NR_046345	ANAPC10	1.07765	0.321975
1192	NM_001256706	ANAPC10	0.754481	0.36497
1193	NM_001256712	ANAPC10	0.563287	0.393063
1194	NM_001256709	ANAPC10	1.84668	0.415092
1195	NM_001256710	ANAPC10	1.73244	0.509826
1196	NM_001256711	ANAPC10	1.19191	0.75114
1197	NM_001256708	ANAPC10	1.2502	0.756502
1198	NM_014885	ANAPC10	0.90341	0.779954
1199	NM_001256707	ANAPC10	0.953	0.936515
1200	NM_001002244	ANAPC11	0.409157	0.00299751
1201	NM_001002246	ANAPC11	0.515527	0.216696
1202	NM_001002248	ANAPC11	0.484845	0.221577
1203	NM_001002249	ANAPC11	0.779686	0.400296
1204	NM_001002245	ANAPC11	1.74608	0.476699
1205	NM_001002247	ANAPC11	1.51377	0.527531
1206	NM_016476	ANAPC11	0.835616	0.743811
1207	NM_001242375	ANAPC13	2.78467	0.0984622
1208	NM_001242374	ANAPC13	1.3656	0.285595
1209	NM_015391	ANAPC13	0.960324	0.880968
1210	NM_014042	ANAPC15	0.786985	0.124878
1211	NR_038392	ANAPC16	0.546737	0.268016
1212	NR_038391	ANAPC16	0.61133	0.355883
1213	NM_001242546	ANAPC16	1.05064	0.817135
1214	NM_001242548	ANAPC16	1.11523	0.900284
1215	NM_173473	ANAPC16	0.95503	0.904379
1216	NM_001242547	ANAPC16	0.998839	0.996744
1217	NR_037931	ANAPC1P1	0.564502	0.238057
1218	NM_013366	ANAPC2	0.685517	0.0688192
1219	NM_013367	ANAPC4	0.824173	0.0887676
1220	NM_016237	ANAPC5	1.16805	0.391871
1221	NM_001137559	ANAPC5	0.898836	0.727858
1222	NM_016238	ANAPC7	0.861551	0.28979
1223	NM_001137664	ANAPC7	0.96609	0.770542
1224	NM_001097577	ANG	2.81942	0.20533
1225	NM_001145	ANG	1.17794	0.806267
1226	NM_015305	ANGEL1	1.40035	0.0786818
1227	NM_144567	ANGEL2	0.848716	0.179928
1228	NM_001199859	ANGPT1	3.38772	0.0608497
1229	NM_001146	ANGPT1	3.80098	0.0685118
1230	NM_001118887	ANGPT2	1.04897	0.0987673
1231	NM_001147	ANGPT2	1.04763	0.0987763
1232	NM_001118888	ANGPT2	1.19564	0.0993212
1233	NM_015985	ANGPT4	2.61802	0.0235873
1234	NM_004673	ANGPTL1	0.970006	0.669782
1235	NM_012098	ANGPTL2	3.3039	0.0247152
1236	NM_014495	ANGPTL3	0.921632	0.373901
1237	NM_139314	ANGPTL4	2.17585	0.0632149
1238	NM_001039667	ANGPTL4	1.63062	0.450858
1239	NM_178127	ANGPTL5	0.956544	0.373901
1240	NM_031917	ANGPTL6	1.08483	0.643277
1241	NM_021146	ANGPTL7	0.922935	0.373901
1242	NM_001191054	ANHX	1.05534	0.373901
1243	NM_020477	ANK1	0.268961	0.0346469
1244	NM_020476	ANK1	0.243661	0.0355144
1245	NM_000037	ANK1	0.461026	0.0754613
1246	NM_020478	ANK1	0.880864	0.176635
1247	NM_020475	ANK1	0.540984	0.18945
1248	NM_001142446	ANK1	0.711668	0.248241
1249	NM_001142445	ANK1	0.449063	0.332555
1250	NM_020480	ANK1	0.465618	0.400295
1251	NM_020977	ANK2	0.540043	0.201754
1252	NM_001127493	ANK2	0.745375	0.233965
1253	NM_001148	ANK2	0.830089	0.348663
1254	NM_001204404	ANK3	1.95981	0.180233
1255	NM_020987	ANK3	1.18824	0.272325
1256	NM_001149	ANK3	1.48102	0.470266
1257	NM_001204403	ANK3	1.10826	0.833806
1258	NM_144708	ANKAR	1.10278	0.384517
1259	NM_182703	ANKDD1A	1.4624	0.0345272
1260	NM_001271529	ANKDD1B	1.5674	0.182139
1261	NM_153228	ANKFN1	1.93196	0.155419
1262	NM_001257999	ANKFY1	0.73405	0.495829
1263	NM_016376	ANKFY1	1.19494	0.510423
1264	NR_047571	ANKFY1	0.907916	0.735781
1265	NM_054027	ANKH	2.17487	0.0320148
1266	NM_024668	ANKHD1	0.492533	0.0551645
1267	NM_017978	ANKHD1	0.509587	0.117467
1268	NM_001197030	ANKHD1	1.57571	0.382816
1269	NM_017747	ANKHD1	1.10304	0.468511
1270	NM_020690	ANKHD1-EIF4EBP3	0.94594	0.913856
1271	NM_019004	ANKIB1	0.97208	0.71417
1272	NM_178510	ANKK1	1.10777	0.792848
1273	NM_152363	ANKLE1	1.1035	0.594737
1274	NM_015114	ANKLE2	1.17848	0.334534
1275	NM_016552	ANKMY1	0.795102	0.425765
1276	NM_017844	ANKMY1	0.907781	0.781657
1277	NM_020319	ANKMY2	1.10517	0.431403
1278	NM_023039	ANKRA2	0.895039	0.625987
1279	NM_014391	ANKRD1	2.0002	0.241168
1280	NM_017664	ANKRD10	1.0083	0.933621
1281	NR_045839	ANKRD11	1.17208	0.269403
1282	NM_001256182	ANKRD11	1.05376	0.735475
1283	NM_013275	ANKRD11	1.04015	0.854226
1284	NM_001256183	ANKRD11	1.03037	0.907357
1285	NM_001083625	ANKRD12	1.11515	0.534228
1286	NM_001204056	ANKRD12	1.15211	0.581451
1287	NM_015208	ANKRD12	1.039	0.890053
1288	NM_033121	ANKRD13A	1.45241	0.519052
1289	NM_152345	ANKRD13B	0.543716	0.0200678
1290	NM_030816	ANKRD13C	1.026	0.82362
1291	NR_030767	ANKRD13D	1.11769	0.780223
1292	NM_207354	ANKRD13D	0.968515	0.786091
1293	NM_001009941	ANKRD16	0.484428	0.373901
1294	NM_001009943	ANKRD16	0.999945	0.373901
1295	NM_019046	ANKRD16	1.62146	0.56286
1296	NM_198889	ANKRD17	0.990081	0.924693
1297	NM_032217	ANKRD17	1.00079	0.998276
1298	NM_147195	ANKRD18A	0.977721	0.85794
1299	NM_001244752	ANKRD18B	2.24183	0.0653978
1300	NR_003291	ANKRD18DP	0.760251	0.158646
1301	NR_026868	ANKRD19P	0.611454	0.32294
1302	NM_020349	ANKRD2	0.823812	0.303345
1303	NM_001129981	ANKRD2	0.71	0.320941
1304	NM_032250	ANKRD20A1	0.558515	0.197551
1305	NR_027270	ANKRD20A11P	1.43888	0.116936
1306	NR_046228	ANKRD20A12P	1.71947	0.0568725
1307	NR_073430	ANKRD20A19P	1.06295	0.730734
1308	NM_001012421	ANKRD20A2	0.34212	0.109663
1309	NM_001012421.1	ANKRD20A2	0.631745	0.176915
1310	NM_001012419.2	ANKRD20A3	0.69225	0.404937
1311	NM_001012419	ANKRD20A3	0.839509	0.541221
1312	NM_001012419.1	ANKRD20A3	0.896992	0.814302
1313	NM_001098805	ANKRD20A4	0.997692	0.37473
1314	NR_040113	ANKRD20A5P	0.950521	0.687633
1315	NR_003366	ANKRD20A8P	1.06148	0.813417
1316	NR_027995	ANKRD20A9P	1.00579	0.912214
1317	NM_144590	ANKRD22	1.44246	0.104987
1318	NM_144994	ANKRD23	1.04311	0.87265
1319	NM_133475	ANKRD24	0.96067	0.565277
1320	NM_014915	ANKRD26	0.79486	0.0842103
1321	NM_001256053	ANKRD26	0.880938	0.486822
1322	NR_026556	ANKRD26P1	0.92843	0.581339
1323	NM_032139	ANKRD27	0.912386	0.241355
1324	NM_001195099	ANKRD28	0.854389	0.555409
1325	NM_001195098	ANKRD28	1.10653	0.788063
1326	NM_015199	ANKRD28	0.979977	0.962644
1327	NM_173505	ANKRD29	1.8313	0.0354521
1328	NM_052997	ANKRD30A	1.62609	0.00850039
1329	NM_001145029	ANKRD30B	2.134	0.00320273
1330	NR_027020	ANKRD30BL	3.3023	0.341229
1331	NR_027019	ANKRD30BL	1	?
1332	NR_026916	ANKRD30BP2	1.09736	0.581929
1333	NM_001164443	ANKRD31	0.97044	0.412311
1334	NM_032290	ANKRD32	0.855475	0.501252
1335	NM_182608	ANKRD33	1.11384	0.373901
1336	NM_001164440	ANKRD33B	0.70435	0.104518
1337	NM_001039888	ANKRD34A	1.352	0.345813
1338	NM_001004441	ANKRD34B	0.879333	0.104199
1339	NM_001146341	ANKRD34C	0.998371	0.955317
1340	NM_144698	ANKRD35	1.23543	0.0617758
1341	NM_001164315	ANKRD36	1.16663	0.147732
1342	NM_025190	ANKRD36B	1.03355	0.730385
1343	NR_026844	ANKRD36BP1	0.907883	0.773135
1344	NR_015424	ANKRD36BP2	1.11746	0.373901
1345	NM_181726	ANKRD37	1.06568	0.881527
1346	NM_016466	ANKRD39	0.845254	0.394365
1347	NM_052855	ANKRD40	0.655603	0.0103569
1348	NM_182603	ANKRD42	1.53256	0.17712
1349	NM_001195144	ANKRD44	1.32009	0.182018
1350	NM_153697	ANKRD44	1.21795	0.272585
1351	NM_198493	ANKRD45	0.412776	0.031761
1352	NM_001270379	ANKRD46	0.635181	0.150852
1353	NM_001270377	ANKRD46	1.22798	0.462033
1354	NM_198401	ANKRD46	1.38843	0.606661
1355	NM_001270378	ANKRD46	1.219	0.654717
1356	NM_017704	ANKRD49	0.989487	0.939258
1357	NM_198798	ANKRD5	1.35732	0.468456
1358	NM_022096	ANKRD5	0.799736	0.731217
1359	NM_020337	ANKRD50	0.677119	0.416393
1360	NM_001167882	ANKRD50	0.594472	0.421363
1361	NM_173595	ANKRD52	1.05513	0.775882
1362	NM_024933	ANKRD53	0.796702	0.342498
1363	NM_001115116	ANKRD53	0.960234	0.893854
1364	NR_036556	ANKRD54	0.875354	0.719273
1365	NM_138797	ANKRD54	0.984731	0.948705
1366	NM_024669	ANKRD55	0.653806	0.0824588
1367	NM_001242811	ANKRD6	0.899417	0.203554
1368	NM_001242813	ANKRD6	0.69835	0.234725
1369	NM_001242814	ANKRD6	0.497558	0.422188
1370	NM_014942	ANKRD6	0.848458	0.659326
1371	NM_001242809	ANKRD6	0.726728	0.713306
1372	NM_001271700	ANKRD61	1.08828	0.419331
1373	NR_040115	ANKRD62P1-PARP4P3	1.13393	0.373901
1374	NM_001190479	ANKRD63	0.59198	0.278769
1375	NM_001243535	ANKRD65	0.721734	0.26678
1376	NM_001145210	ANKRD65	1	0.277895
1377	NM_001243536	ANKRD65	0.953383	0.744399
1378	NM_152326	ANKRD9	0.68394	0.451138
1379	NM_015245	ANKS1A	0.958545	0.826057
1380	NM_152788	ANKS1B	0.740126	0.00629578
1381	NM_001204080	ANKS1B	0.453451	0.0373686
1382	NM_001204079	ANKS1B	0.730265	0.0401555
1383	NM_001204081	ANKS1B	0.436924	0.0872101
1384	NM_001204068	ANKS1B	0.503471	0.133894
1385	NM_001204066	ANKS1B	0.799363	0.277618
1386	NM_001204065	ANKS1B	0.837309	0.308374
1387	NM_001204067	ANKS1B	0.767618	0.328988
1388	NM_181670	ANKS1B	0.779469	0.377974
1389	NM_020140	ANKS1B	0.617663	0.464466
1390	NM_001204069	ANKS1B	0.906541	0.526589
1391	NM_001204070	ANKS1B	0.818629	0.561683
1392	NM_001242929	ANKS3	1.16164	0.387879
1393	NR_040252	ANKS3	0.865709	0.650237
1394	NM_133450	ANKS3	1.15685	0.856385
1395	NM_145865	ANKS4B	1.13288	0.373901
1396	NM_173551	ANKS6	0.785043	0.135092
1397	NM_001144960	ANKUB1	0.743861	0.0766561
1398	NM_001042410	ANKZF1	1.14039	0.684438
1399	NM_018089	ANKZF1	1.04494	0.895591
1400	NM_018685	ANLN	0.788086	0.158367
1401	NM_018043	ANO1	1.72368	0.100954
1402	NR_030691	ANO1	0.952399	0.382098
1403	NM_001204831	ANO10	5.24113	0.0100466
1404	NM_018075	ANO10	2.42229	0.0105364
1405	NM_001204832	ANO10	2.97858	0.101288
1406	NM_001204834	ANO10	2.02709	0.457978
1407	NM_001204833	ANO10	0.88891	0.853325
1408	NM_020373	ANO2	1.02702	0.373901
1409	NM_031418	ANO3	0.878785	0.266497
1410	NM_178826	ANO4	0.991904	0.9676
1411	NM_001142649	ANO5	0.97251	0.492944
1412	NM_213599	ANO5	0.973071	0.493207
1413	NM_001204803	ANO6	1.57012	0.0909315
1414	NM_001142678	ANO6	1.48824	0.10723
1415	NM_001025356	ANO6	1.41533	0.270587
1416	NM_001142679	ANO6	0.961894	0.815858
1417	NM_001001891	ANO7	0.947811	0.78463
1418	NM_020959	ANO8	1.15518	0.716928
1419	NM_001012302	ANO9	1.21491	0.251501
1420	NM_006305	ANP32A	0.600609	0.0410072
1421	NR_026808	ANP32A-IT1	0.713468	0.129046
1422	NR_003144	ANP32AP1	0.641273	0.0368143
1423	NM_006401	ANP32B	0.590342	0.0715191
1424	NM_012403	ANP32C	0.516849	0.0526973
1425	NM_012404	ANP32D	0.513413	0.253251
1426	NM_030920	ANP32E	0.827407	0.349581
1427	NM_001136479	ANP32E	0.688507	0.752005
1428	NM_001136478	ANP32E	0.868154	0.907334
1429	NM_001150	ANPEP	9.91084	0.000671973
1430	NM_018153	ANTXR1	4.15063	0.00116247
1431	NM_032208	ANTXR1	2.86171	0.0140894
1432	NM_053034	ANTXR1	1.20305	0.373901
1433	NM_058172	ANTXR2	3.82234	0.00559093
1434	NM_001145794	ANTXR2	3.00191	0.255338
1435	NM_000700	ANXA1	0.622896	0.018061
1436	NM_007193	ANXA10	1.58314	0.182795
1437	NM_145868	ANXA11	0.696501	0.0870009
1438	NM_001157	ANXA11	1.14993	0.305664
1439	NM_145869	ANXA11	0.849078	0.641449
1440	NM_004306	ANXA13	0.517162	0.0290727
1441	NM_001003954	ANXA13	0.97781	0.0347807
1442	NM_001002857	ANXA2	0.47371	0.0173636
1443	NM_001136015	ANXA2	0.765818	0.126776
1444	NM_004039	ANXA2	1.38366	0.605918
1445	NM_001002858	ANXA2	1.19233	0.710051
1446	NR_001562	ANXA2P1	0.614559	0.0281766
1447	NR_003573	ANXA2P2	0.659627	0.041879
1448	NR_001446	ANXA2P3	2.5192	0.529361
1449	NM_001014279	ANXA2R	0.961967	0.955388
1450	NM_005139	ANXA3	0.49999	0.191384
1451	NM_001153	ANXA4	0.911782	0.555861
1452	NM_001154	ANXA5	1.11351	0.714194
1453	NM_001193544	ANXA6	14.2579	0.00385904
1454	NM_001155	ANXA6	7.65486	0.00580046
1455	NM_001156	ANXA7	0.866909	0.0634099
1456	NM_004034	ANXA7	2.34452	0.283584
1457	NM_001271703.1	ANXA8	2.35295	0.0313784
1458	NM_001040084.1	ANXA8	1.49259	0.117833
1459	NM_001271702.1	ANXA8	1.00074	0.165916
1460	NM_001271702	ANXA8	1.02672	0.225112
1461	NM_001040084	ANXA8	1.01596	0.237515
1462	NM_001271703	ANXA8	1.12886	0.422844
1463	NM_001098845.1	ANXA8L1	5.47039	0.119146
1464	NM_001098845	ANXA8L1	1.18352	0.307931
1465	NM_001630	ANXA8L2	3.77626	0.11519
1466	NM_003568	ANXA9	1.52918	0.249788
1467	NM_001177507	AOAH	1.26148	0.150638
1468	NM_001177506	AOAH	0.999545	0.973442
1469	NM_001637	AOAH	1.00325	0.979887
1470	NR_046764	AOAH-IT1	0.785618	0.373901
1471	NM_001158	AOC2	1.65484	0.3246
1472	NM_009590	AOC2	1.04546	0.938012
1473	NM_003734	AOC3	1.17654	0.619871
1474	NR_002773	AOC4	1.11021	0.373901
1475	NM_001159	AOX1	4.76736	0.0772696
1476	NM_018569	AP1AR	0.878661	0.699468
1477	NM_001128426	AP1AR	1.20523	0.873982
1478	NM_145730	AP1B1	0.746157	0.308379
1479	NM_001127	AP1B1	1.65535	0.426688
1480	NM_001166019	AP1B1	1.02468	0.88478
1481	NM_001128	AP1G1	0.711225	0.00848199
1482	NM_001030007	AP1G1	0.861904	0.320467
1483	NM_003917	AP1G2	0.989593	0.972752
1484	NM_032493	AP1M1	0.797231	0.2827
1485	NM_001130524	AP1M1	1.6138	0.461902
1486	NM_005498	AP1M2	1.02787	0.968386
1487	NM_001283	AP1S1	1.17448	0.0439499
1488	NM_003916	AP1S2	0.578212	0.199072
1489	NM_001039569	AP1S3	0.422459	0.000712927
1490	NM_130787	AP2A1	0.765092	0.216278
1491	NM_014203	AP2A1	1.24442	0.618968
1492	NM_001242837	AP2A2	1.45714	0.0113802
1493	NM_012305	AP2A2	0.989412	0.948858
1494	NM_001030006	AP2B1	0.689595	0.0311114
1495	NM_001282	AP2B1	0.924922	0.694523
1496	NM_004068	AP2M1	1.46925	0.039858
1497	NM_001025205	AP2M1	0.976429	0.865999
1498	NM_004069	AP2S1	1.17195	0.114791
1499	NM_021575	AP2S1	0.630716	0.510268
1500	NM_001271769	AP3B1	1.73363	0.131023
1501	NM_003664	AP3B1	1.05658	0.777647
1502	NM_004644	AP3B2	0.987466	0.934292
1503	NM_003938	AP3D1	1.09766	0.42155
1504	NM_001261826	AP3D1	0.886573	0.669002
1505	NM_012095	AP3M1	0.680634	0.0728287
1506	NM_207012	AP3M1	1.08343	0.668814
1507	NM_006803	AP3M2	0.70279	0.0123802
1508	NM_001134296	AP3M2	0.754312	0.0904229
1509	NM_001284	AP3S1	1.06235	0.867946
1510	NR_023361	AP3S2	0.718199	0.227405
1511	NR_037582	AP3S2	0.727985	0.281072
1512	NM_005829	AP3S2	0.946565	0.856842
1513	NM_001253852	AP4B1	1.16658	0.0631448
1514	NM_006594	AP4B1	0.911095	0.553316
1515	NM_001253853	AP4B1	0.770652	0.706278
1516	NR_037864	AP4B1-AS1	1.24967	0.154937
1517	NM_001252127	AP4E1	0.789101	0.000246245
1518	NM_007347	AP4E1	0.739942	0.114341
1519	NM_004722	AP4M1	0.681858	0.104897
1520	NM_001254726	AP4S1	0.757289	0.295028
1521	NM_001254729	AP4S1	0.936172	0.835225
1522	NM_007077	AP4S1	0.902933	0.857451
1523	NM_001128126	AP4S1	0.980472	0.869467
1524	NM_001254728	AP4S1	0.99083	0.968384
1525	NM_001254727	AP4S1	1.00867	0.990295
1526	NM_138368	AP5B1	0.859864	0.440826
1527	NR_026895	AP5M1	0.559821	0.721836
1528	NM_018229	AP5M1	0.946969	0.756961
1529	NM_001204446	AP5S1	0.25877	0.0442967
1530	NM_001204447	AP5S1	0.218409	0.0464428
1531	NM_018347	AP5S1	1.34724	0.326195
1532	NM_014855	AP5Z1	1.55437	0.0467755
1533	NM_013229	APAF1	1.85354	0.0476766
1534	NM_181868	APAF1	0.572248	0.252562
1535	NM_001160	APAF1	0.806674	0.545151
1536	NM_181861	APAF1	1.26556	0.642347
1537	NM_181869	APAF1	0.584715	0.668703
1538	NM_001163	APBA1	1.03028	0.84621
1539	NM_001130414	APBA2	0.367922	0.0183973
1540	NM_005503	APBA2	0.365261	0.0539976
1541	NM_004886	APBA3	1.21227	0.285304
1542	NM_145689	APBB1	0.319794	0.0749756
1543	NM_001257324	APBB1	0.539397	0.0816564
1544	NM_001164	APBB1	1.40831	0.292722
1545	NM_001257322	APBB1	0.940475	0.297969
1546	NM_001257321	APBB1	0.999944	0.357241
1547	NM_001257326	APBB1	0.99987	0.357562
1548	NM_001257320	APBB1	0.964453	0.365453
1549	NM_001257323	APBB1	0.664866	0.405781
1550	NR_047512	APBB1	1.20902	0.565809
1551	NM_001257325	APBB1	0.700665	0.608509
1552	NM_001257319	APBB1	1.22405	0.692546
1553	NM_173075	APBB2	4.16043	0.00161431
1554	NM_001166050	APBB2	2.76943	0.00741625
1555	NM_004307	APBB2	2.16335	0.075505
1556	NM_001166051	APBB2	2.24988	0.231184
1557	NM_001166052	APBB2	1.16144	0.88404
1558	NM_001166053	APBB2	1.12514	0.908089
1559	NM_001166054	APBB2	1.12487	0.909346
1560	NM_133173	APBB3	1.85957	0.114894
1561	NM_133174	APBB3	2.07841	0.160787
1562	NM_133172	APBB3	1.25946	0.497384
1563	NM_006051	APBB3	0.991008	0.987049
1564	NM_001127510	APC	0.536886	0.00836605
1565	NM_000038	APC	0.519327	0.0117079
1566	NM_001127511	APC	0.714165	0.0613996
1567	NM_005883	APC2	1.71587	0.0715569
1568	NM_153000	APCDD1	1.55939	0.491771
1569	NM_153360	APCDD1L	63.2475	0.000876759
1570	NR_034147	APCDD1L-AS1	22.3588	0.00098509
1571	NM_001640	APEH	0.586809	0.0353177
1572	NM_001641	APEX1	0.641987	0.328448
1573	NM_080648	APEX1	1.27178	0.690286
1574	NM_001244249	APEX1	1.13012	0.787024
1575	NM_080649	APEX1	0.93184	0.857514
1576	NM_014481	APEX2	0.808705	0.367034
1577	NM_001271748	APEX2	1.116	0.838591
1578	NM_001243772	APH1A	0.675903	0.337936
1579	NM_001077628	APH1A	0.576531	0.500258
1580	NR_045033	APH1A	1.23469	0.515136
1581	NM_016022	APH1A	0.928845	0.838449
1582	NR_045034	APH1A	0.80388	0.843384
1583	NM_001243771	APH1A	1.05752	0.929935
1584	NR_045035	APH1A	0.957941	0.969713
1585	NM_001145646	APH1B	1.91236	0.110048
1586	NM_031301	APH1B	1.69459	0.227076
1587	NM_006595	API5	1.24518	0.445303
1588	NM_001243747	API5	0.502009	0.47183
1589	NM_001142930	API5	0.775275	0.62143
1590	NM_001142931	API5	1.2225	0.706765
1591	NR_024625	API5	0.972086	0.893437
1592	NM_015957	APIP	1.05013	0.873485
1593	NM_199294	APITD1	0.411617	0.00113925
1594	NR_036462	APITD1	1.02001	0.7293
1595	NR_037187	APITD1-CORT	1.56782	0.34256
1596	NM_001243768	APITD1-CORT	1.21549	0.355678
1597	NM_199006	APITD1-CORT	0.712022	0.376713
1598	NM_198544	APITD1-CORT	0.720577	0.410273
1599	NM_001270517	APITD1-CORT	0.866467	0.87507
1600	NM_173545	APLF	2.80856	0.0149823
1601	NM_017413	APLN	1.38663	0.375692
1602	NR_027991	APLNR	1.30498	0.322431
1603	NM_005161	APLNR	1.30032	0.479381
1604	NM_001024807	APLP1	2.14044	0.0237494
1605	NM_005166	APLP1	2.15492	0.0238691
1606	NM_001642	APLP2	1.23158	0.218683
1607	NM_001243299	APLP2	1.35443	0.378636
1608	NR_024515	APLP2	1.38622	0.490812
1609	NM_001142276	APLP2	1.15706	0.495967
1610	NM_001142277	APLP2	1.23216	0.636641
1611	NR_024516	APLP2	1.36019	0.706355
1612	NM_001142278	APLP2	1.05053	0.94802
1613	NM_020531	APMAP	1.13392	0.0210436
1614	NM_000039	APOA1	0.994178	0.992474
1615	NM_144772	APOA1BP	0.753497	0.0330098
1616	NM_001643	APOA2	1.32168	0.373901
1617	NM_000482	APOA4	1.07816	0.65497
1618	NM_001166598	APOA5	1.06572	0.373901
1619	NM_052968	APOA5	1.03621	0.373901
1620	NM_000384	APOB	1.0404	0.0122112
1621	NM_006789	APOBEC2	1.09187	0.594288
1622	NM_145699	APOBEC3A	1.00328	0.921003
1623	NM_001270406	APOBEC3A	1.01628	0.931822
1624	NM_004900	APOBEC3B	0.996846	0.784647
1625	NM_001270411	APOBEC3B	0.968516	0.797021
1626	NM_014508	APOBEC3C	1.62692	0.137883
1627	NM_152426	APOBEC3D	1.62974	0.298259
1628	NM_001006666	APOBEC3F	1.41697	0.522365
1629	NM_145298	APOBEC3F	1.13182	0.788396
1630	NM_021822	APOBEC3G	1.17016	0.711596
1631	NM_018690	APOBR	0.883111	0.356255
1632	NM_001645	APOC1	0.793591	0.388069
1633	NR_028414	APOC1P1	1.25589	0.373901
1634	NR_028413	APOC1P1	1.00004	0.373901
1635	NR_028412	APOC1P1	1	?
1636	NM_000040	APOC3	0.780094	0.373901
1637	NM_001647	APOD	1.01336	0.952097
1638	NM_000041	APOE	3.78421	0.068052
1639	NM_003661	APOL1	6.34905	0.0195588
1640	NM_001136541	APOL1	6.57167	0.0264003
1641	NM_001136540	APOL1	8.67361	0.0523974
1642	NM_145343	APOL1	2.41071	0.17792
1643	NM_145637	APOL2	1.36234	0.157196
1644	NM_030882	APOL2	1.08564	0.738106
1645	NM_145640	APOL3	2.96759	0.121672
1646	NM_145641	APOL3	1.02049	0.373901
1647	NM_145642	APOL3	1.04782	0.373901
1648	NR_027834	APOL3	1.58403	0.420963
1649	NR_027835	APOL3	1.44311	0.672168
1650	NR_027833	APOL3	1.12501	0.882114
1651	NM_030643	APOL4	1.13185	0.274724
1652	NM_145660	APOL4	1.19682	0.42524
1653	NM_030641	APOL6	1.16327	0.79674
1654	NM_030817	APOLD1	1.53451	0.421866
1655	NM_001130415	APOLD1	0.891356	0.579291
1656	NM_001256169.2	APOM	0.56421	0.246846
1657	NM_019101.1	APOM	0.572403	0.5973
1658	NR_045828	APOM	0.916641	0.921045
1659	NR_026545	APOO	0.357803	0.330539
1660	NM_024122	APOO	0.948051	0.815275
1661	NM_198450	APOOL	1.16686	0.413493
1662	NM_032374	APOPT1	0.936492	0.590694
1663	NM_001204301	APP	2.02614	0.147827
1664	NM_001136130	APP	2.03057	0.208305
1665	NM_001204302	APP	2.05475	0.217893
1666	NM_001136016	APP	1.5147	0.217955
1667	NM_001204303	APP	2.21755	0.298872
1668	NM_201414	APP	1.27424	0.364891
1669	NM_001136129	APP	2.21311	0.469526
1670	NM_001136131	APP	1.66099	0.499705
1671	NM_000484	APP	1.21468	0.737757
1672	NM_201413	APP	1.2197	0.758513
1673	NM_006380	APPBP2	1.05024	0.652038
1674	NM_012096	APPL1	0.733818	0.0203578
1675	NM_001251904	APPL2	2.313	0.11318
1676	NM_018171	APPL2	1.18553	0.581431
1677	NM_001251905	APPL2	0.818739	0.636823
1678	NM_000485	APRT	0.787824	0.279812
1679	NM_001030018	APRT	0.399426	0.607585
1680	NR_036579	APTX	0.439559	0.00296492
1681	NM_001195249	APTX	0.325867	0.0271851
1682	NR_036577	APTX	0.557612	0.0347053
1683	NM_001195248	APTX	0.658764	0.127385
1684	NR_036578	APTX	0.313061	0.138524
1685	NM_001195254	APTX	0.374446	0.179418
1686	NM_001195250	APTX	0.626172	0.183421
1687	NR_036576	APTX	0.468682	0.270137
1688	NM_175069	APTX	0.795206	0.299
1689	NM_175073	APTX	0.629957	0.429177
1690	NM_001195251	APTX	0.717381	0.635405
1691	NM_001195252	APTX	0.965756	0.960524
1692	NM_198098	AQP1	2.83688	0.165818
1693	NM_001185062	AQP1	2.2592	0.245992
1694	NM_001185060	AQP1	0.900961	0.77758
1695	NM_001185061	AQP1	1.06784	0.931751
1696	NM_080429	AQP10	1.11018	0.373901
1697	NM_173039	AQP11	0.366003	0.00432108
1698	NM_000486	AQP2	0.890168	0.139153
1699	NM_004925	AQP3	1.28819	0.249595
1700	NM_004028	AQP4	0.923312	1.49525e-05
1701	NM_001650	AQP4	0.963139	1.62886e-05
1702	NR_026908	AQP4-AS1	1.09469	0.373901
1703	NM_001651	AQP5	0.590429	0.0628368
1704	NM_001652	AQP6	0.784758	0.266501
1705	NM_001170	AQP7	0.981491	0.954645
1706	NR_002817	AQP7P1	1.68787	0.0994434
1707	NR_026558	AQP7P3	1.64738	0.0560023
1708	NM_001169	AQP8	1.07336	0.373901
1709	NM_020980	AQP9	1.0724	0.674534
1710	NM_173800	AQPEP	1.21948	0.190834
1711	NM_014691	AQR	0.65124	0.030445
1712	NM_001011645	AR	2.12153	0.175491
1713	NM_000044	AR	1.31156	0.614859
1714	NM_001256197	ARAF	1.31746	0.256244
1715	NM_001654	ARAF	0.748022	0.327578
1716	NM_001256196	ARAF	1.68928	0.408157
1717	NM_001040118	ARAP1	2.38171	0.0765939
1718	NM_015242	ARAP1	1.7663	0.216281
1719	NM_001135190	ARAP1	1.25761	0.324779
1720	NM_015230	ARAP2	0.533255	0.0587392
1721	NM_022481	ARAP3	0.854334	0.398346
1722	NM_015193	ARC	1.21741	0.446676
1723	NM_001655	ARCN1	1.47918	0.04656
1724	NM_001142281	ARCN1	1.66744	0.340701
1725	NM_001024227	ARF1	3.98823	0.0322518
1726	NM_001024228	ARF1	4.339	0.0395549
1727	NM_001024226	ARF1	3.02481	0.181265
1728	NM_001658	ARF1	1.07135	0.70307
1729	NM_001659	ARF3	1.01712	0.820523
1730	NM_001660	ARF4	1.78894	0.0966616
1731	NM_001662	ARF5	0.669485	0.00807924
1732	NM_001663	ARF6	0.984179	0.92644
1733	NM_018209	ARFGAP1	1.72318	0.0811494
1734	NM_175609	ARFGAP1	3.00348	0.116753
1735	NM_032389	ARFGAP2	0.611232	0.336551
1736	NM_001242832	ARFGAP2	1.42034	0.366782
1737	NM_014570	ARFGAP3	1.67171	0.00679953
1738	NM_001142293	ARFGAP3	2.10017	0.285968
1739	NM_006421	ARFGEF1	0.952469	0.67961
1740	NM_006420	ARFGEF2	1.38544	0.0673508
1741	NM_014447	ARFIP1	0.706584	0.627805
1742	NM_001025593	ARFIP1	1.02657	0.826838
1743	NM_001025595	ARFIP1	1.05532	0.892715
1744	NM_001242854	ARFIP2	2.37122	0.0511379
1745	NM_001242856	ARFIP2	1.75244	0.200212
1746	NM_001242855	ARFIP2	1.0969	0.704841
1747	NM_012402	ARFIP2	1.08111	0.786388
1748	NR_051956	ARFRP1	1.83477	0.0273563
1749	NR_051955	ARFRP1	2.40568	0.0701501
1750	NM_001267544	ARFRP1	2.30656	0.229657
1751	NM_001267545	ARFRP1	1.7571	0.31821
1752	NM_001134758	ARFRP1	0.626392	0.360773
1753	NM_003224	ARFRP1	0.653548	0.428765
1754	NR_051958	ARFRP1	1.49245	0.484019
1755	NR_051954	ARFRP1	1.45823	0.506345
1756	NM_001267546	ARFRP1	1.56905	0.532564
1757	NR_051957	ARFRP1	1.22163	0.569717
1758	NM_001267548	ARFRP1	1.07665	0.650141
1759	NM_001267549	ARFRP1	0.903799	0.863147
1760	NM_001267547	ARFRP1	0.974077	0.94072
1761	NM_000045	ARG1	0.922019	0.373901
1762	NM_001244438	ARG1	0.962111	0.373901
1763	NM_001172	ARG2	2.35951	0.000317104
1764	NM_001012659	ARGFX	1.03918	0.373901
1765	NR_002222	ARGFXP2	1.24183	0.27593
1766	NM_018011	ARGLU1	0.92601	0.282142
1767	NM_004308	ARHGAP1	0.997734	0.988324
1768	NM_024605	ARHGAP10	0.752699	0.411803
1769	NM_014783	ARHGAP11A	0.631573	0.0116087
1770	NM_199357	ARHGAP11A	0.815245	0.374288
1771	NM_001039841	ARHGAP11B	0.667001	0.22519
1772	NM_001270696	ARHGAP12	0.570103	0.083656
1773	NM_001270699	ARHGAP12	0.635736	0.102194
1774	NM_018287	ARHGAP12	0.644679	0.186447
1775	NM_001270695	ARHGAP12	0.677786	0.466869
1776	NM_001270698	ARHGAP12	0.887923	0.758887
1777	NM_001270697	ARHGAP12	0.897142	0.763277
1778	NM_018054	ARHGAP17	1.3515	0.209131
1779	NM_001006634	ARHGAP17	0.842565	0.391807
1780	NM_033515	ARHGAP18	0.615742	0.00274903
1781	NM_001204300	ARHGAP19	0.700729	0.204749
1782	NM_001256423	ARHGAP19	0.97385	0.891038
1783	NM_032900	ARHGAP19	1.00391	0.987477
1784	NR_037909	ARHGAP19-SLIT1	1	?
1785	NM_001258417	ARHGAP20	1.78228	0.100511
1786	NM_001258418	ARHGAP20	1.31773	0.104575
1787	NM_001258416	ARHGAP20	1.18647	0.105896
1788	NM_020809	ARHGAP20	1.52552	0.247487
1789	NM_001258415	ARHGAP20	1.8586	0.337611
1790	NM_020824	ARHGAP21	0.938892	0.512683
1791	NM_001256025	ARHGAP22	2.30325	0.0490618
1792	NM_001256026	ARHGAP22	0.573726	0.101741
1793	NM_021226	ARHGAP22	1.0922	0.293988
1794	NR_045675	ARHGAP22	1.36048	0.368486
1795	NM_001256024	ARHGAP22	0.730538	0.497849
1796	NM_001199417	ARHGAP23	1.93113	0.0643052
1797	NM_001042669	ARHGAP24	9.17354	0.000284737
1798	NM_001025616	ARHGAP24	5.94938	0.0403542
1799	NM_031305	ARHGAP24	1.80487	0.229838
1800	NM_014882	ARHGAP25	2.30954	0.0585381
1801	NM_001166276	ARHGAP25	1.56522	0.0937597
1802	NM_001166277	ARHGAP25	1.30597	0.390558
1803	NM_001007231	ARHGAP25	1.0228	0.745405
1804	NM_001135608	ARHGAP26	0.479357	0.0154981
1805	NM_015071	ARHGAP26	0.90567	0.770018
1806	NM_199282	ARHGAP27	0.710717	0.264901
1807	NM_174919	ARHGAP27	1.00683	0.976708
1808	NM_001010000	ARHGAP28	2.04085	0.132817
1809	NM_004815	ARHGAP29	0.789082	0.139529
1810	NM_001025598	ARHGAP30	2.7443	0.00705369
1811	NM_181720	ARHGAP30	1.13838	0.245922
1812	NM_020754	ARHGAP31	2.61871	0.00331489
1813	NM_014715	ARHGAP32	1.48969	0.140558
1814	NM_001142685	ARHGAP32	0.682366	0.314643
1815	NM_001172630	ARHGAP33	1.23723	0.623811
1816	NM_052948	ARHGAP33	0.958712	0.857979
1817	NM_004491	ARHGAP35	1.01923	0.926345
1818	NM_144967	ARHGAP36	0.193609	0.0231845
1819	NM_025251	ARHGAP39	0.73373	0.299215
1820	NM_001666	ARHGAP4	0.945041	0.860913
1821	NM_001164741	ARHGAP4	0.9927	0.948456
1822	NM_001164431	ARHGAP40	1.00675	0.946345
1823	NM_152432	ARHGAP42	1.66128	0.04147
1824	NM_014859	ARHGAP44	0.965571	0.78401
1825	NM_001173	ARHGAP5	0.793892	0.017079
1826	NM_001030055	ARHGAP5	0.924256	0.588622
1827	NR_027263	ARHGAP5-AS1	0.833332	0.423565
1828	NM_013427	ARHGAP6	1.71518	0.0311976
1829	NM_006125	ARHGAP6	1.2869	0.12828
1830	NM_013423	ARHGAP6	1.30846	0.538604
1831	NM_001017526	ARHGAP8	0.999704	0.373901
1832	NM_001198726	ARHGAP8	0.897728	0.373901
1833	NM_181335	ARHGAP8	0.995309	0.373901
1834	NM_001080157	ARHGAP9	2.38772	2.00493e-06
1835	NM_032496	ARHGAP9	1.00196	0.373184
1836	NM_001080156	ARHGAP9	1.03682	0.914326
1837	NM_004309	ARHGDIA	0.844817	0.332182
1838	NM_001185077	ARHGDIA	0.752666	0.499399
1839	NM_001185078	ARHGDIA	1.03772	0.969118
1840	NM_001175	ARHGDIB	3.95501	0.0100553
1841	NM_001176	ARHGDIG	0.934865	0.737854
1842	NM_004706	ARHGEF1	0.641248	0.14836
1843	NM_198977	ARHGEF1	1.21308	0.608736
1844	NM_199002	ARHGEF1	0.989799	0.981431
1845	NM_014629	ARHGEF10	1.08674	0.714902
1846	NM_001011722	ARHGEF10L	1.91869	0.0618191
1847	NM_018125	ARHGEF10L	1.18942	0.569744
1848	NM_014784	ARHGEF11	1.29791	0.0184
1849	NM_198236	ARHGEF11	1.15895	0.698716
1850	NM_015313	ARHGEF12	1.18302	0.593416
1851	NM_001198665	ARHGEF12	1.04594	0.841896
1852	NM_025014	ARHGEF15	1.06022	0.18753
1853	NM_173728	ARHGEF15	1.02829	0.1886
1854	NM_014448	ARHGEF16	0.4221	0.0881913
1855	NM_014786	ARHGEF17	1.61995	0.232622
1856	NM_015318	ARHGEF18	1.12494	0.413616
1857	NM_001130955	ARHGEF18	0.913172	0.737769
1858	NM_153213	ARHGEF19	0.688836	0.0349695
1859	NM_004723	ARHGEF2	2.89868	0.00661635
1860	NM_001162384	ARHGEF2	1.50385	0.034937
1861	NM_001162383	ARHGEF2	1.49398	0.20923
1862	NM_001111270	ARHGEF25	2.01219	0.0369732
1863	NM_182947	ARHGEF25	2.63683	0.248388
1864	NR_046223	ARHGEF25	1.47763	0.663322
1865	NM_001251962	ARHGEF26	0.747331	0.0810714
1866	NM_015595	ARHGEF26	0.36543	0.104541
1867	NM_001251963	ARHGEF26	0.550152	0.400274
1868	NR_037901	ARHGEF26-AS1	1.10575	0.699663
1869	NM_001244364	ARHGEF28	0.242534	0.0339328
1870	NM_001080479	ARHGEF28	0.405579	0.0370243
1871	NM_001177693	ARHGEF28	0.576945	0.294361
1872	NM_001128615	ARHGEF3	1.49216	0.0379996
1873	NM_019555	ARHGEF3	1.61031	0.335796
1874	NM_001128616	ARHGEF3	1.36665	0.343299
1875	NM_001145451	ARHGEF33	0.89846	0.128336
1876	NM_001003702	ARHGEF35	1.04244	0.843848
1877	NM_001001669	ARHGEF37	0.657426	0.388035
1878	NM_001242729	ARHGEF38	0.921016	0.742236
1879	NM_032818	ARHGEF39	0.378716	0.00753046
1880	NM_015320	ARHGEF4	0.162694	0.0133029
1881	NM_032995	ARHGEF4	0.348001	0.110642
1882	NM_018071	ARHGEF40	2.44606	0.0295985
1883	NM_005435	ARHGEF5	1.0939	0.78623
1884	NM_004840	ARHGEF6	1.59192	0.123742
1885	NM_001113511	ARHGEF7	1.06441	0.117737
1886	NM_001113512	ARHGEF7	1.06173	0.371489
1887	NM_145735	ARHGEF7	1.05124	0.500765
1888	NM_001113513	ARHGEF7	0.904408	0.581716
1889	NM_003899	ARHGEF7	1.05998	0.880111
1890	NM_001173479	ARHGEF9	1.18234	0.524574
1891	NM_015185	ARHGEF9	1.17165	0.537581
1892	NM_001173480	ARHGEF9	1.13814	0.545372
1893	NM_139135	ARID1A	0.779371	0.623842
1894	NM_006015	ARID1A	1.02799	0.921519
1895	NM_020732	ARID1B	1.11054	0.233901
1896	NM_017519	ARID1B	0.907312	0.540731
1897	NM_152641	ARID2	0.763694	0.00894919
1898	NM_005224	ARID3A	1.51587	0.116655
1899	NM_006465	ARID3B	0.314716	0.00387524
1900	NM_001017363	ARID3C	1.02852	0.921526
1901	NM_023000	ARID4A	1.68187	0.0221148
1902	NM_023001	ARID4A	1.67669	0.125703
1903	NM_002892	ARID4A	1.41144	0.275445
1904	NM_031371	ARID4B	1.47422	0.214673
1905	NM_001206794	ARID4B	1.17331	0.570213
1906	NM_016374	ARID4B	0.869969	0.777923
1907	NM_212481	ARID5A	1.5825	0.0308999
1908	NM_001244638	ARID5B	0.743067	0.0684883
1909	NM_032199	ARID5B	0.693461	0.528987
1910	NM_005744	ARIH1	0.659453	0.00216668
1911	NM_006321	ARIH2	0.900536	0.0546633
1912	NM_001123040	ARIH2OS	0.993336	0.980403
1913	NM_001177	ARL1	1.39504	0.120181
1914	NM_173664	ARL10	1.1299	0.810321
1915	NM_138450	ARL11	1.05212	0.373901
1916	NM_001012990	ARL13A	0.999794	0.373901
1917	NM_001162491	ARL13A	0.788079	0.373901
1918	NM_001162490	ARL13A	1.11942	0.373901
1919	NM_182896	ARL13B	1.85078	0.178874
1920	NM_001174150	ARL13B	0.568003	0.423191
1921	NM_001174151	ARL13B	0.623366	0.512205
1922	NM_144996	ARL13B	0.780849	0.831559
1923	NR_033427	ARL13B	1.05906	0.874846
1924	NM_025047	ARL14	1.52754	0.411463
1925	NM_152316	ARL14EP	1.2466	0.216383
1926	NM_001195581	ARL14EPL	0.726994	0.678411
1927	NM_019087	ARL15	2.86134	0.00470372
1928	NM_001040025	ARL16	0.941107	0.696581
1929	NM_016632	ARL17A	0.703088	0.0563695
1930	NM_001113738	ARL17A	1.21223	0.202725
1931	NM_016632.4	ARL17A	0.804472	0.523319
1932	NM_001113738.1	ARL17A	0.910823	0.695102
1933	NM_001039083	ARL17B	0.195423	0.00641371
1934	NM_001103154	ARL17B	1.69496	0.4658
1935	NM_001667	ARL2	0.785177	0.397216
1936	NM_001199745	ARL2	0.916843	0.92367
1937	NM_012106	ARL2BP	0.588293	0.0145653
1938	NR_037650	ARL2-SNX15	0.839985	0.778301
1939	NM_004311	ARL3	0.974383	0.806826
1940	NM_001037164	ARL4A	0.525659	0.0417095
1941	NM_212460	ARL4A	0.531718	0.0763407
1942	NM_005738	ARL4A	0.45574	0.0948103
1943	NM_001195396	ARL4A	0.55445	0.225184
1944	NM_005737	ARL4C	0.58188	1.95829e-05
1945	NM_001661	ARL4D	3.53478	0.00042935
1946	NM_012097	ARL5A	1.44813	0.258378
1947	NM_177985	ARL5A	1.07407	0.924408
1948	NM_001037174	ARL5A	1.05039	0.948115
1949	NM_178815	ARL5B	0.926641	0.795929
1950	NM_001143968	ARL5C	0.850278	0.373901
1951	NM_032146	ARL6	2.46386	0.069435
1952	NM_177976	ARL6	0.795038	0.504339
1953	NM_015161	ARL6IP1	0.679053	0.0657764
1954	NM_018694	ARL6IP4	1.45743	0.145661
1955	NM_016638	ARL6IP4	0.681521	0.587658
1956	NM_001002251	ARL6IP4	1.16053	0.729177
1957	NM_001002252	ARL6IP4	0.998282	0.99554
1958	NM_006407	ARL6IP5	1.01549	0.943969
1959	NM_152522	ARL6IP6	0.67242	0.218023
1960	NR_024526	ARL6IP6	1.11121	0.921923
1961	NM_138795	ARL8A	0.817744	0.0558885
1962	NM_001256129	ARL8A	2.12831	0.461967
1963	NM_018184	ARL8B	1.09331	0.535443
1964	NM_206919	ARL9	0.855727	0.471103
1965	NM_018120	ARMC1	0.925576	0.732139
1966	NM_001161012	ARMC10	0.552608	0.170832
1967	NM_001161010	ARMC10	0.688107	0.324179
1968	NM_001161009	ARMC10	0.830577	0.484314
1969	NM_001161013	ARMC10	0.669832	0.507587
1970	NM_031905	ARMC10	0.97608	0.877999
1971	NM_001161011	ARMC10	0.915124	0.919005
1972	NM_145028	ARMC12	0.735485	0.373901
1973	NM_032131	ARMC2	0.892682	0.618892
1974	NM_173081	ARMC3	1.1897	0.284099
1975	NM_018076	ARMC4	1.73747	0.0288438
1976	NM_024742	ARMC5	1.65481	0.00434594
1977	NM_001105247	ARMC5	0.800817	0.425372
1978	NM_001199196	ARMC6	0.775024	0.275926
1979	NM_033415	ARMC6	0.898278	0.712065
1980	NM_024585	ARMC7	0.723412	0.0226102
1981	NM_015396	ARMC8	0.744266	0.147898
1982	NM_001267042	ARMC8	0.513945	0.179728
1983	NM_213654	ARMC8	0.712632	0.475432
1984	NM_014154	ARMC8	1.206	0.55724
1985	NR_049770	ARMC8	1.28014	0.575856
1986	NM_001267041	ARMC8	0.989085	0.913794
1987	NM_025139	ARMC9	1.34953	0.0147788
1988	NM_001271466	ARMC9	1.18733	0.656202
1989	NM_016608	ARMCX1	0.348286	0.104593
1990	NM_014782	ARMCX2	7.67773	0.000751831
1991	NM_177949	ARMCX2	4.20821	0.00926162
1992	NM_016607	ARMCX3	3.31903	0.00160278
1993	NM_177947	ARMCX3	1.76215	0.00657672
1994	NM_177948	ARMCX3	3.19074	0.0285035
1995	NM_001256155	ARMCX4	0.563947	0.00321894
1996	NR_045861	ARMCX4	0.794462	0.42455
1997	NR_045864	ARMCX4	1.02694	0.658043
[truncated: 35,817 more rows]

## Sheet: All transcripts less duplicates
	U251.JMJD3wt
	(all U251.JMJD3wt vs. vector control less duplicates)
	Transcript	Gene Symbol	Ratio	p-value
1	NM_130786>A1BG	A1BG	1.48042	0.225121
2	NR_015380>A1BG-AS1	A1BG-AS1	1.45046	0.0724694
3	NM_014576>A1CF	A1CF	1.00784	0.413269
4	NM_000014>A2M	A2M	3.15704	0.0301252
5	NR_046256>A2ML1	A2ML1	1.05495	0.373901
6	NR_040112>A2MP1	A2MP1	0.875323	0.373901
7	NM_017436>A4GALT	A4GALT	5.01295	0.00910092
8	NM_016161>A4GNT	A4GNT	0.950427	0.792571
9	NR_037584>AA06	AA06	1.26903	0.373901
10	NM_015665>AAAS	AAAS	0.750849	0.323908
11	NM_023928>AACS	AACS	0.81602	0.0190983
12	NR_024035>AACSP1	AACSP1	2.20739	0.0136747
13	NM_001086>AADAC	AADAC	0.900991	0.373901
14	NM_207365>AADACL2	AADACL2	1.12917	0.373901
15	NM_001103170>AADACL3	AADACL3	1.00015	0.974444
16	NM_001013630>AADACL4	AADACL4	1.06163	0.373901
17	NM_016228>AADAT	AADAT	0.535732	0.129316
18	NM_153698>AAED1	AAED1	0.632946	0.0396422
19	NM_024666>AAGAB	AAGAB	0.631051	0.174446
20	NM_014911>AAK1	AAK1	1.15648	0.0943373
21	NM_024684>AAMDC	AAMDC	0.814732	0.314001
22	NM_001087>AAMP	AAMP	0.727778	0.00079399
23	NM_001166579>AANAT	AANAT	1.06095	0.657778
24	NM_015511>AAR2	AAR2	1.08383	0.763902
25	NM_001025357>AARD	AARD	0.906862	0.373901
26	NM_001605>AARS	AARS	1.00399	0.983499
27	NM_020745>AARS2	AARS2	0.779484	0.183034
28	NM_001261434>AARSD1	AARSD1	0.911476	0.499067
29	NM_181806>AASDH	AASDH	0.761262	0.110641
30	NM_015423>AASDHPPT	AASDHPPT	0.961679	0.773948
31	NM_005763>AASS	AASS	0.338117	0.00791622
32	NM_012138>AATF	AATF	0.742723	0.282495
33	NM_004920>AATK	AATK	1.54807	0.00726532
34	NR_027255>AATK-AS1	AATK-AS1	0.843186	0.138826
35	NM_020686>ABAT	ABAT	1.37751	0.0800769
36	NM_005502>ABCA1	ABCA1	2.36539	0.0130864
37	NM_080282>ABCA10	ABCA10	1.1175	0.623968
38	NR_002451>ABCA11P	ABCA11P	0.932545	0.744701
39	NM_173076>ABCA12	ABCA12	0.868391	0.456259
40	NM_152701>ABCA13	ABCA13	1.74219	0.221474
41	NR_003574>ABCA17P	ABCA17P	0.959056	0.694919
42	NM_212533>ABCA2	ABCA2	1.23537	0.468169
43	NM_001089>ABCA3	ABCA3	0.348287	0.0126197
44	NM_000350>ABCA4	ABCA4	1.28739	0.0797776
45	NM_018672>ABCA5	ABCA5	1.36463	0.647619
46	NM_080284>ABCA6	ABCA6	1.46721	0.186228
47	NM_019112>ABCA7	ABCA7	1.19312	0.733674
48	NM_007168>ABCA8	ABCA8	1.11082	0.839091
49	NM_080283>ABCA9	ABCA9	1.13903	0.497073
50	NM_000927>ABCB1	ABCB1	4.71024	0.00386263
51	NM_012089>ABCB10	ABCB10	0.894077	0.766221
52	NM_003742>ABCB11	ABCB11	0.70111	0.00732165
53	NM_018849>ABCB4	ABCB4	1.4906	0.564889
54	NM_178559>ABCB5	ABCB5	1.10437	0.117408
55	NM_005689>ABCB6	ABCB6	0.582996	0.0236267
56	NM_001271696>ABCB7	ABCB7	0.628478	0.370133
57	NM_007188>ABCB8	ABCB8	1.17557	0.435686
58	NM_203444>ABCB9	ABCB9	0.706993	0.138241
59	NM_004996>ABCC1	ABCC1	1.1443	0.623538
60	NM_033450>ABCC10	ABCC10	2.52411	0.0382663
61	NM_033151>ABCC11	ABCC11	1.00036	0.847445
62	NM_033226>ABCC12	ABCC12	0.931915	0.373901
63	NM_000392>ABCC2	ABCC2	1.18155	0.40432
64	NM_003786>ABCC3	ABCC3	0.442732	0.100931
65	NM_005845>ABCC4	ABCC4	1.32523	0.0311254
66	NM_005688>ABCC5	ABCC5	1.47104	0.0801738
67	NM_001171>ABCC6	ABCC6	1.08959	0.748986
68	NR_003569>ABCC6P1	ABCC6P1	1	?
69	NR_023387>ABCC6P2	ABCC6P2	1.30494	0.521399
70	NM_000352>ABCC8	ABCC8	1.04299	0.49208
71	NM_020297>ABCC9	ABCC9	6.68421	0.117926
72	NM_000033>ABCD1	ABCD1	1.07367	0.843055
73	NM_005164>ABCD2	ABCD2	0.965689	0.373901
74	NM_002858>ABCD3	ABCD3	0.672536	0.0147763
75	NM_005050>ABCD4	ABCD4	0.893018	0.671817
76	NM_001040876>ABCE1	ABCE1	1.75292	0.499798
77	NM_001025091>ABCF1	ABCF1	0.730883	0.042772
78	NM_007189>ABCF2	ABCF2	0.791991	0.300556
79	NM_018358>ABCF3	ABCF3	0.823774	0.100717
80	NM_207629>ABCG1	ABCG1	2.37119	0.130594
81	NM_004827>ABCG2	ABCG2	1.34904	0.0142415
82	NM_022169>ABCG4	ABCG4	1.00162	0.798038
83	NM_022436>ABCG5	ABCG5	1.23523	0.138553
84	NM_032604>ABHD1	ABHD1	1.03382	0.915108
85	NM_018394>ABHD10	ABHD10	1.40103	0.0581708
86	NR_026912>ABHD11	ABHD11	0.597694	0.125883
87	NR_026690>ABHD11-AS1	ABHD11-AS1	1.46398	0.364366
88	NM_015600>ABHD12	ABHD12	1.15524	0.588684
89	NM_001206673>ABHD12B	ABHD12B	0.999786	0.599357
90	NM_032859>ABHD13	ABHD13	1.23435	0.296579
91	NM_015407>ABHD14A	ABHD14A	1.16452	0.496772
92	NR_037192>ABHD14A-ACY1	ABHD14A-ACY1	1.67913	0.297434
93	NM_032750>ABHD14B	ABHD14B	1.19167	0.723635
94	NM_198147>ABHD15	ABHD15	0.580425	0.069962
95	NM_021160.2>ABHD16A	ABHD16A	0.689805	0.0977635
96	NM_080622>ABHD16B	ABHD16B	1.37532	0.135922
97	NM_152924>ABHD2	ABHD2	0.923988	0.473208
98	NM_138340>ABHD3	ABHD3	0.756691	0.0147748
99	NM_022060>ABHD4	ABHD4	0.968446	0.924192
100	NM_016006>ABHD5	ABHD5	1.61043	0.410464
101	NM_020676>ABHD6	ABHD6	1.46895	0.0100465
102	NM_024527>ABHD8	ABHD8	0.818999	0.379997
103	NM_001178121>ABI1	ABI1	0.446588	0.049612
104	NM_005759>ABI2	ABI2	0.838455	0.09027
105	NM_001135186>ABI3	ABI3	1.26508	0.0546703
106	NM_015429>ABI3BP	ABI3BP	2.00115	0.145819
107	NM_007313>ABL1	ABL1	0.339887	0.00599876
108	NM_001168237>ABL2	ABL2	1.21097	0.319778
109	NM_001003408>ABLIM1	ABLIM1	1.20896	0.456968
110	NM_001130083>ABLIM2	ABLIM2	0.999841	0.373901
111	NM_014945>ABLIM3	ABLIM3	10.7891	4.01482e-05
112	NM_020469>ABO	ABO	1.01062	0.94966
113	NM_001091>ABP1	ABP1	2.01584	0.0330063
114	NR_046393>ABR	ABR	1.46092	0.352869
115	NM_139166>ABRA	ABRA	1.00847	0.964621
116	NM_021243>ABRACL	ABRACL	1.04668	0.851701
117	NM_013375>ABT1	ABT1	0.849068	0.389977
118	NR_033429>ABTB1	ABTB1	5.31536	0.0126174
119	NM_145804>ABTB2	ABTB2	2.85351	0.0185204
120	NM_001607>ACAA1	ACAA1	0.568419	0.0537395
121	NM_006111>ACAA2	ACAA2	1.35239	0.1131
122	NM_198837>ACACA	ACACA	0.733174	0.285626
123	NM_001093>ACACB	ACACB	0.613691	0.277858
124	NM_001136538>ACAD10	ACAD10	1.99383	0.137101
125	NM_032169>ACAD11	ACAD11	1.00402	0.980237
126	NM_014384>ACAD8	ACAD8	0.920627	0.692699
127	NM_014049>ACAD9	ACAD9	0.880357	0.239126
128	NM_000016>ACADM	ACADM	0.538468	0.0393622
129	NM_000017>ACADS	ACADS	0.594714	0.0954086
130	NM_001609>ACADSB	ACADSB	0.649936	0.00802306
131	NM_001270448>ACADVL	ACADVL	1.61346	0.0386607
132	NM_001135>ACAN	ACAN	1.07351	0.131918
133	NM_014716>ACAP1	ACAP1	1.16174	0.457173
134	NM_012287>ACAP2	ACAP2	1.03971	0.769965
135	NM_030649>ACAP3	ACAP3	1.35408	0.174735
136	NM_000019>ACAT1	ACAT1	0.692312	0.120628
137	NM_005891>ACAT2	ACAT2	0.429172	0.000374155
138	NM_022735>ACBD3	ACBD3	1.56468	0.0276874
139	NM_001135706>ACBD4	ACBD4	0.228271	0.0250304
140	NM_001042473>ACBD5	ACBD5	0.668494	0.137773
141	NM_032360>ACBD6	ACBD6	0.770679	0.12703
142	NM_001039844>ACBD7	ACBD7	0.489058	0.167222
143	NM_032592>ACCS	ACCS	3.58321	0.235624
144	NM_001031854>ACCSL	ACCSL	0.843049	0.373901
145	NM_001082486>ACD	ACD	0.410091	0.0182838
146	NM_000789>ACE	ACE	3.21785	0.0906755
147	NM_021804>ACE2	ACE2	1.05913	0.373901
148	NM_133492>ACER1	ACER1	1.19008	0.373901
149	NM_001010887>ACER2	ACER2	0.54706	0.155771
150	NM_018367>ACER3	ACER3	1.01588	0.859664
151	NM_000665>ACHE	ACHE	1.54013	0.361438
152	NM_014977>ACIN1	ACIN1	1.57612	0.228417
153	NM_198830>ACLY	ACLY	1.13454	0.461941
154	NM_138326>ACMSD	ACMSD	0.948067	0.746579
155	NM_020186>ACN9	ACN9	1.8431	0.0245587
156	NM_002197>ACO1	ACO1	1.04231	0.562135
157	NM_001098>ACO2	ACO2	0.742066	0.159016
158	NM_001037161>ACOT1	ACOT1	0.799692	0.373936
159	NM_147161>ACOT11	ACOT11	2.72651	0.00199333
160	NM_130767>ACOT12	ACOT12	1.01978	0.893197
161	NM_018473>ACOT13	ACOT13	0.909758	0.519245
162	NM_006821>ACOT2	ACOT2	1.23766	0.0239397
163	NM_152331>ACOT4	ACOT4	1.55646	0.0304298
164	NM_001037162>ACOT6	ACOT6	0.734931	0.353713
165	NM_007274>ACOT7	ACOT7	0.486442	0.135551
166	NM_005469>ACOT8	ACOT8	1.05353	0.621177
167	NM_001033583>ACOT9	ACOT9	1.20343	0.4613
168	NM_004035>ACOX1	ACOX1	0.667804	0.15859
169	NM_003500>ACOX2	ACOX2	1.55405	0.225666
170	NM_001101667>ACOX3	ACOX3	1.23576	0.360757
171	NM_001142807>ACOXL	ACOXL	1.07388	0.58248
172	NM_007099>ACP1	ACP1	1.41838	0.166049
173	NM_001131064>ACP2	ACP2	1.49367	0.649505
174	NM_001611>ACP5	ACP5	8.50872	0.000594275
175	NM_016361>ACP6	ACP6	0.321582	0.0257295
176	NM_001037172>ACPL2	ACPL2	3.6964	0.0846462
177	NM_001099>ACPP	ACPP	1.62049	0.13998
178	NM_033068>ACPT	ACPT	0.932811	0.694242
179	NM_001097>ACR	ACR	1.07026	0.373901
180	NM_032489>ACRBP	ACRBP	1.10683	0.62869
181	NM_052957>ACRC	ACRC	0.976619	0.909107
182	NM_020069>ACRV1	ACRV1	0.509924	0.290737
183	NM_015162>ACSBG1	ACSBG1	0.967557	0.841642
184	NM_030924>ACSBG2	ACSBG2	0.86669	0.50182
185	NM_025149>ACSF2	ACSF2	2.10323	0.152504
186	NR_023316>ACSF3	ACSF3	0.26004	0.05106
187	NM_001995>ACSL1	ACSL1	1.36002	0.267402
188	NM_203372>ACSL3	ACSL3	0.725062	0.130797
189	NM_004458>ACSL4	ACSL4	1.84535	0.0396417
190	NM_016234>ACSL5	ACSL5	3.52524	0.109608
191	NM_001205251>ACSL6	ACSL6	1.19231	0.124808
192	NM_001010845>ACSM2A	ACSM2A	0.999998	0.373933
193	NM_001105069>ACSM2B	ACSM2B	0.950585	0.373901
194	NM_202000>ACSM3	ACSM3	1.3749	0.405547
195	NM_001080454>ACSM4	ACSM4	1.11291	0.373901
196	NM_017888>ACSM5	ACSM5	1.32691	0.116382
197	NM_001252675>ACSS1	ACSS1	0.850353	0.689761
198	NM_001076552>ACSS2	ACSS2	1.69476	0.307792
199	NM_024560>ACSS3	ACSS3	0.638735	0.276631
200	NM_001100>ACTA1	ACTA1	1.85452	0.497093
201	NM_001613>ACTA2	ACTA2	2.6958	0.0547899
202	NM_001101>ACTB	ACTB	1.22625	0.17857
203	NM_001017992>ACTBL2	ACTBL2	4.95952	0.0221914
204	NM_005159>ACTC1	ACTC1	1.32339	0.0764728
205	NR_037688>ACTG1	ACTG1	2.86356	0.181608
206	NR_024438>ACTG1P4	ACTG1P4	0.898868	0.746963
207	NM_001615>ACTG2	ACTG2	0.640325	0.55899
208	NM_001024675>ACTL10	ACTL10	0.451101	0.0100005
209	NM_178042>ACTL6A	ACTL6A	2.31351	0.168826
210	NM_006687>ACTL7A	ACTL7A	1.15838	0.55529
211	NM_006686>ACTL7B	ACTL7B	1.01153	0.950455
212	NM_030812>ACTL8	ACTL8	1.24453	0.254303
213	NM_178525>ACTL9	ACTL9	0.890788	0.373901
214	NM_001130004>ACTN1	ACTN1	2.47066	0.12488
215	NR_073422>ACTN1-AS1	ACTN1-AS1	1.50447	0.155168
216	NM_001103>ACTN2	ACTN2	0.848269	0.157419
217	NM_001258371>ACTN3	ACTN3	1.00268	0.493549
218	NM_004924>ACTN4	ACTN4	0.928719	0.576067
219	NM_018477>ACTR10	ACTR10	1.11788	0.483251
220	NM_005736>ACTR1A	ACTR1A	0.794387	0.00331297
221	NM_005735>ACTR1B	ACTR1B	0.840689	0.507237
222	NM_001005386>ACTR2	ACTR2	1.9941	0.307049
223	NM_005721>ACTR3	ACTR3	1.21109	0.241974
224	NM_020445>ACTR3B	ACTR3B	0.440087	0.147862
225	NR_045000>ACTR3BP5	ACTR3BP5	0.778282	0.591262
226	NM_001164458>ACTR3C	ACTR3C	1.01051	0.373901
227	NM_024855>ACTR5	ACTR5	0.893991	0.63145
228	NM_022496>ACTR6	ACTR6	1.49104	0.168486
229	NM_022899>ACTR8	ACTR8	1.02331	0.588635
230	NM_032487>ACTRT3	ACTRT3	0.932806	0.769802
231	NM_001111067>ACVR1	ACVR1	2.04167	0.000311116
232	NM_020328>ACVR1B	ACVR1B	1.18829	0.129547
233	NM_001111032>ACVR1C	ACVR1C	0.920627	0.037393
234	NM_001616>ACVR2A	ACVR2A	0.73269	0.0553401
235	NM_001106>ACVR2B	ACVR2B	0.750032	0.226338
236	NR_028389>ACVR2B-AS1	ACVR2B-AS1	1.17212	0.589294
237	NM_001077401>ACVRL1	ACVRL1	1.15664	0.0454312
238	NM_000666>ACY1	ACY1	0.486375	0.190739
239	NM_203488>ACYP1	ACYP1	0.250686	0.34728
240	NM_138448>ACYP2	ACYP2	1.23539	0.0830745
241	NM_000022>ADA	ADA	4.34703	0.00391549
242	NM_001159280>ADAL	ADAL	0.571701	0.032301
243	NM_001110>ADAM10	ADAM10	1.58499	0.122551
244	NM_002390>ADAM11	ADAM11	0.931302	0.530554
245	NM_003474>ADAM12	ADAM12	1.72126	0.208271
246	NM_001261464>ADAM15	ADAM15	1.48421	0.134879
247	NM_003183>ADAM17	ADAM17	1.31391	0.476476
248	NM_001190956>ADAM18	ADAM18	1.14872	0.373901
249	NM_033274>ADAM19	ADAM19	1.10347	0.246782
250	NR_036636>ADAM1A	ADAM1A	1.04346	0.807362
251	NM_003814>ADAM20	ADAM20	0.802816	0.0538543
252	NR_037933>ADAM20P1	ADAM20P1	1.09304	0.483607
253	NM_003813>ADAM21	ADAM21	1.97353	0.128548
254	NR_003951>ADAM21P1	ADAM21P1	1.24171	0.174419
255	NM_021723>ADAM22	ADAM22	0.949985	0.076744
256	NM_003812>ADAM23	ADAM23	0.245716	0.00103676
257	NM_014265>ADAM28	ADAM28	4.58439	0.0187456
258	NM_021794>ADAM30	ADAM30	0.907219	0.143858
259	NM_145004>ADAM32	ADAM32	0.8789	0.228566
260	NM_153202>ADAM33	ADAM33	1.12382	0.0111329
261	NR_001448>ADAM5	ADAM5	1.12857	0.373901
262	NM_003817>ADAM7	ADAM7	0.974447	0.698549
263	NM_001164490>ADAM8	ADAM8	1.81743	0.114545
264	NR_027878>ADAM9	ADAM9	2.07871	0.353072
265	NM_006988>ADAMTS1	ADAMTS1	7.47213	0.0360221
266	NM_030957>ADAMTS10	ADAMTS10	2.2685	0.119435
267	NM_030955>ADAMTS12	ADAMTS12	9.60582	0.00070281
268	NM_139026>ADAMTS13	ADAMTS13	0.920157	0.231111
269	NM_139155>ADAMTS14	ADAMTS14	14.4534	0.00252819
270	NM_139055>ADAMTS15	ADAMTS15	0.549559	0.0234256
271	NM_139056>ADAMTS16	ADAMTS16	1.58115	0.15689
272	NM_139057>ADAMTS17	ADAMTS17	1.05092	0.730809
273	NM_199355>ADAMTS18	ADAMTS18	6.10255	0.00227302
274	NM_133638>ADAMTS19	ADAMTS19	1.08137	0.839768
275	NM_014244>ADAMTS2	ADAMTS2	7.77832	0.000117623
276	NM_025003>ADAMTS20	ADAMTS20	1.38791	0.168879
277	NM_014243>ADAMTS3	ADAMTS3	11.6508	6.62322e-05
278	NM_005099>ADAMTS4	ADAMTS4	0.105779	0.00329217
279	NM_007038>ADAMTS5	ADAMTS5	4.96185	0.0441455
280	NM_197941>ADAMTS6	ADAMTS6	3.52579	0.167833
281	NM_014272>ADAMTS7	ADAMTS7	2.00013	0.0649431
282	NM_007037>ADAMTS8	ADAMTS8	0.942179	0.70721
283	NM_182920>ADAMTS9	ADAMTS9	3.61766	0.0195932
284	NR_038264>ADAMTS9-AS2	ADAMTS9-AS2	1.15184	0.628983
285	NM_001040272>ADAMTSL1	ADAMTSL1	2.36531	0.00212044
286	NM_014694>ADAMTSL2	ADAMTSL2	1.09017	0.173263
287	NM_207517>ADAMTSL3	ADAMTSL3	1.12041	0.0353001
288	NM_019032>ADAMTSL4	ADAMTSL4	1.65351	0.154389
289	NM_213604>ADAMTSL5	ADAMTSL5	1.27671	0.424329
290	NM_006869>ADAP1	ADAP1	1.83588	0.028553
291	NM_018404>ADAP2	ADAP2	2.45269	0.00279716
292	NM_015840>ADAR	ADAR	1.17171	0.200961
293	NM_001160230>ADARB1	ADARB1	1.42481	0.0426694
294	NM_018702>ADARB2	ADARB2	1.00187	0.959026
295	NM_012091>ADAT1	ADAT1	0.841361	0.658878
296	NM_182503>ADAT2	ADAT2	0.930618	0.781765
297	NM_138422>ADAT3	ADAT3	1.06098	0.805826
298	NM_052998>ADC	ADC	1.26507	0.737016
299	NM_001142545>ADCK1	ADCK1	2.10081	0.0425723
300	NM_052853>ADCK2	ADCK2	0.460372	0.0576578
301	NM_020247>ADCK3	ADCK3	0.735196	0.188378
302	NM_001142555>ADCK4	ADCK4	1.31502	0.554451
303	NM_174922>ADCK5	ADCK5	1.10933	0.704243
304	NM_021116>ADCY1	ADCY1	1.03992	0.434056
305	NM_001167749>ADCY10	ADCY10	0.84348	0.323685
306	NR_026938>ADCY10P1	ADCY10P1	1.1527	0.493298
307	NM_020546>ADCY2	ADCY2	1.00723	0.883126
308	NM_004036>ADCY3	ADCY3	0.641054	0.202465
309	NM_001198568>ADCY4	ADCY4	1.00021	0.373901
310	NM_183357>ADCY5	ADCY5	1.20516	0.373568
311	NM_020983>ADCY6	ADCY6	1.19028	0.246604
312	NM_001114>ADCY7	ADCY7	1.57606	0.0236773
313	NM_001115>ADCY8	ADCY8	1.57417	0.0557134
314	NM_001116>ADCY9	ADCY9	0.938015	0.800387
315	NM_001099733>ADCYAP1	ADCYAP1	1.00595	0.882133
316	NM_001199637>ADCYAP1R1	ADCYAP1R1	1.12801	0.232218
317	NM_001119>ADD1	ADD1	0.803962	0.426059
318	NM_001617>ADD2	ADD2	0.36593	0.0309759
319	NM_016824>ADD3	ADD3	0.750147	0.556625
320	NM_024694>ADGB	ADGB	0.998332	0.955349
321	NM_000668>ADH1B	ADH1B	1	?
322	NM_000669>ADH1C	ADH1C	0.831861	0.14086
323	NM_000671>ADH5	ADH5	1.1222	0.506898
324	NM_000672>ADH6	ADH6	0.899229	0.574931
325	NM_144650>ADHFE1	ADHFE1	1.22908	0.650353
326	NM_018269>ADI1	ADI1	0.656227	0.0228004
327	NM_004797>ADIPOQ	ADIPOQ	1.09253	0.142517
328	NR_046662>ADIPOQ-AS1	ADIPOQ-AS1	1.00245	0.975962
329	NR_046083>ADIPOR1	ADIPOR1	1.25562	0.535988
330	NM_024551>ADIPOR2	ADIPOR2	1.25771	0.038075
331	NM_001202450>ADK	ADK	1.12078	0.11429
332	NM_001124>ADM	ADM	2.88589	6.64652e-05
333	NM_001253845>ADM2	ADM2	0.693093	0.0764524
334	NM_001101340>ADM5	ADM5	0.609733	0.0407088
335	NM_181442>ADNP	ADNP	1.00457	0.975771
336	NM_014913>ADNP2	ADNP2	0.833191	0.0832543
337	NM_032804>ADO	ADO	0.855383	0.43064
338	NM_000674>ADORA1	ADORA1	0.468767	0.188756
339	NM_000675>ADORA2A	ADORA2A	1.64265	0.225578
340	NR_028483>ADORA2A-AS1	ADORA2A-AS1	1.06197	0.764554
341	NM_000676>ADORA2B	ADORA2B	0.609259	0.000146784
342	NM_001081976>ADORA3	ADORA3	1.17959	0.373901
343	NR_023318>ADPGK	ADPGK	1.3537	0.200178
344	NR_040107>ADPGK-AS1	ADPGK-AS1	0.945328	0.761559
345	NM_001125>ADPRH	ADPRH	1.61461	0.111842
346	NM_199162>ADPRHL1	ADPRHL1	0.622416	0.02998
347	NM_017825>ADPRHL2	ADPRHL2	0.751905	0.0398672
348	NM_020233>ADPRM	ADPRM	1.08075	0.611938
349	NM_033303>ADRA1A	ADRA1A	0.924793	0.373495
350	NM_000679>ADRA1B	ADRA1B	1.06142	0.750795
351	NM_000678>ADRA1D	ADRA1D	0.584477	0.233606
352	NM_000681>ADRA2A	ADRA2A	1.2227	0.118674
353	NM_000682>ADRA2B	ADRA2B	0.929977	0.535124
354	NM_000684>ADRB1	ADRB1	0.925848	0.694372
355	NM_000024>ADRB2	ADRB2	1.99019	0.0533169
356	NM_000025>ADRB3	ADRB3	0.935128	0.373901
357	NM_001619>ADRBK1	ADRBK1	0.743592	0.166092
358	NM_005160>ADRBK2	ADRBK2	1.43716	0.0337112
359	NM_175573>ADRM1	ADRM1	0.907068	0.879011
360	NM_000026>ADSL	ADSL	0.799233	0.275848
361	NM_001126>ADSS	ADSS	0.914159	0.613086
362	NM_152328>ADSSL1	ADSSL1	2.8272	0.0899359
363	NM_001143948>ADTRP	ADTRP	1.09918	0.714505
364	NM_001129>AEBP1	AEBP1	0.889983	0.285884
365	NM_001114176>AEBP2	AEBP2	0.718246	0.596178
366	NM_022767>AEN	AEN	0.682957	0.441597
367	NM_198969>AES	AES	0.525437	0.0328667
368	NM_001134647>AFAP1	AFAP1	1.27067	0.28038
369	NR_026892>AFAP1-AS1	AFAP1-AS1	1.04626	0.851775
370	NM_152406>AFAP1L1	AFAP1L1	13.3937	0.0096221
371	NM_001001936>AFAP1L2	AFAP1L2	4.98051	0.00126372
372	NM_005935>AFF1	AFF1	1.77162	0.018727
373	NM_001169124>AFF2	AFF2	0.619229	0.12166
374	NM_001025108>AFF3	AFF3	2.3403	0.00475638
375	NM_014423>AFF4	AFF4	1.0013	0.993287
376	NR_003228>AFG3L1P	AFG3L1P	0.55159	0.243264
377	NM_006796>AFG3L2	AFG3L2	0.78095	0.297721
378	NM_001145526>AFMID	AFMID	0.85045	0.335905
379	NM_001134>AFP	AFP	3.21044	0.0202169
380	NM_203437>AFTPH	AFTPH	2.3186	0.0365344
381	NM_001171988>AGA	AGA	1.25866	0.715982
382	NM_014914>AGAP1	AGAP1	1.09465	0.464025
383	NM_133447>AGAP11	AGAP11	1.15607	0.66421
384	NM_014770>AGAP2	AGAP2	1.28312	0.477117
385	NM_001042535>AGAP3	AGAP3	0.793544	0.36364
386	NM_133446>AGAP4	AGAP4	1.08729	0.6437
387	NM_001144000>AGAP5	AGAP5	0.939861	0.874005
388	NM_001077665>AGAP6	AGAP6	1.03383	0.823702
389	NM_001077685>AGAP7	AGAP7	1.90801	0.568986
390	NM_001077686>AGAP8	AGAP8	0.963043	0.935005
391	NM_001190810.1>AGAP9	AGAP9	1.59124	0.0427617
392	NM_152336>AGBL1	AGBL1	1.05935	0.373901
393	NM_024783>AGBL2	AGBL2	0.892916	0.790693
394	NM_178563>AGBL3	AGBL3	0.99869	0.996063
395	NM_032785>AGBL4	AGBL4	1.24875	0.0603848
396	NM_021831>AGBL5	AGBL5	0.87291	0.57826
397	NR_038190.1>AGER	AGER	0.405561	0.127107
398	NM_004504>AGFG1	AGFG1	0.734263	0.112181
399	NM_006076>AGFG2	AGFG2	0.972912	0.519135
400	NM_018046>AGGF1	AGGF1	0.960059	0.667995
401	NM_018238>AGK	AGK	0.854988	0.306879
402	NM_000642>AGL	AGL	0.765597	0.612458
403	NM_024758>AGMAT	AGMAT	1.27851	0.406846
404	NM_001004320>AGMO	AGMO	4.00866	0.00380508
405	NM_006411.6>AGPAT1	AGPAT1	0.757304	0.493269
406	NM_006412>AGPAT2	AGPAT2	0.918832	0.667135
407	NM_020132>AGPAT3	AGPAT3	0.925971	0.778195
408	NM_020133>AGPAT4	AGPAT4	0.982285	0.942321
409	NR_024277>AGPAT4-IT1	AGPAT4-IT1	1.26177	0.477576
410	NM_018361>AGPAT5	AGPAT5	0.89259	0.467123
411	NM_178819>AGPAT6	AGPAT6	1.1725	0.46543
412	NM_001256421>AGPAT9	AGPAT9	0.4885	0.199754
413	NM_001083612>AGPHD1	AGPHD1	0.388038	0.0991739
414	NM_003659>AGPS	AGPS	0.614468	0.00277483
415	NM_006408>AGR2	AGR2	0.985426	0.983054
416	NM_176813>AGR3	AGR3	1.25875	0.373901
417	NM_198576>AGRN	AGRN	1.26714	0.40921
418	NR_026811.1>AGSK1	AGSK1	1.79188	0.492547
419	NM_000029>AGT	AGT	26.2383	0.000257312
420	NM_015239>AGTPBP1	AGTPBP1	0.639032	0.0150199
421	NM_032049>AGTR1	AGTR1	5.89617	0.0175217
422	NM_001040197>AGTRAP	AGTRAP	2.48555	0.0164077
423	NM_031900>AGXT2	AGXT2	1.1003	0.449133
424	NR_027474>AGXT2L1	AGXT2L1	0.968165	0.332866
425	NM_153373>AGXT2L2	AGXT2L2	1.69449	0.0534611
426	NM_015446>AHCTF1	AHCTF1	0.954989	0.550542
427	NM_000687>AHCY	AHCY	0.733409	0.0834771
428	NM_006621>AHCYL1	AHCYL1	0.630798	0.27328
429	NM_001130720>AHCYL2	AHCYL2	1.50345	0.171717
430	NM_001029882>AHDC1	AHDC1	1.90471	0.148135
431	NM_001134831>AHI1	AHI1	2.00146	0.126314
432	NM_024060>AHNAK	AHNAK	0.661469	0.0663009
433	NM_138420>AHNAK2	AHNAK2	0.705451	0.417878
434	NM_001621>AHR	AHR	1.01388	0.96915
435	NM_020731>AHRR	AHRR	1.76034	0.0373078
436	NM_012111>AHSA1	AHSA1	0.763724	0.0797314
437	NM_152392>AHSA2	AHSA2	1.42389	0.345507
438	NM_001622>AHSG	AHSG	0.780183	0.339153
439	NM_020661>AICDA	AICDA	1.03564	0.373901
440	NM_022831>AIDA	AIDA	1.03804	0.876504
441	NM_004847.3>AIF1	AIF1	1.10882	0.373901
442	NM_031426>AIF1L	AIF1L	0.0789831	0.000762191
443	NM_004208>AIFM1	AIFM1	0.734294	0.0519882
444	NM_001198696>AIFM2	AIFM2	0.758198	0.306739
445	NM_001146288>AIFM3	AIFM3	0.996287	0.622147
446	NM_016108>AIG1	AIG1	0.727393	0.141063
447	NM_001624>AIM1	AIM1	0.394574	0.00756974
448	NM_001039775>AIM1L	AIM1L	1.56221	0.05088
449	NM_004833>AIM2	AIM2	2.77137	0.00325433
450	NM_001142416>AIMP1	AIMP1	0.594214	0.146259
451	NM_006303>AIMP2	AIMP2	0.781092	0.351915
452	NM_003977>AIP	AIP	1.15125	0.339812
453	NM_001033054>AIPL1	AIPL1	0.900613	0.156121
454	NM_000383>AIRE	AIRE	1.09818	0.373901
455	NR_047514>AIRN	AIRN	0.917965	0.116204
456	NM_001042478>AJAP1	AJAP1	4.71021	0.0651663
457	NM_032876>AJUBA	AJUBA	0.556188	0.0926746
458	NM_000476>AK1	AK1	0.795172	0.0300437
459	NM_013411>AK2	AK2	0.722471	0.0426952
460	NM_001199856>AK3	AK3	0.600637	0.469509
461	NM_013410>AK4	AK4	1.65122	0.200814
462	NM_174858>AK5	AK5	0.425992	0.159385
463	NM_152327>AK7	AK7	0.946667	0.373901
464	NM_152572>AK8	AK8	0.85438	0.444731
465	NM_003488>AKAP1	AKAP1	0.817825	0.421872
466	NM_007202>AKAP10	AKAP10	0.931795	0.636766
467	NM_016248>AKAP11	AKAP11	1.33135	0.0612982
468	NM_144497>AKAP12	AKAP12	0.654438	0.0954835
469	NM_001270546>AKAP13	AKAP13	0.931731	0.805631
470	NM_001008535>AKAP14	AKAP14	0.834891	0.373901
471	NM_005088>AKAP17A	AKAP17A	0.690515	0.00662085
472	NM_001198656>AKAP2	AKAP2	1.43488	0.125433
473	NM_006422>AKAP3	AKAP3	0.937814	0.779642
474	NM_004857>AKAP5	AKAP5	0.442145	0.00116359
475	NM_004274>AKAP6	AKAP6	0.431084	0.0479441
476	NM_016377>AKAP7	AKAP7	0.460473	0.0140666
477	NM_005858>AKAP8	AKAP8	1.04777	0.64215
478	NM_014371>AKAP8L	AKAP8L	1.08779	0.292364
479	NM_005751>AKAP9	AKAP9	0.907358	0.663508
480	NM_001145128>AKD1	AKD1	0.804544	0.0721077
481	NR_045417>AKIP1	AKIP1	0.625971	0.0356078
482	NM_024595>AKIRIN1	AKIRIN1	1.22858	0.102785
483	NM_018064>AKIRIN2	AKIRIN2	0.73033	0.0579325
484	NM_030767>AKNA	AKNA	0.790219	0.407554
485	NM_152763>AKNAD1	AKNAD1	0.952293	0.491649
486	NM_001202413>AKR1A1	AKR1A1	1.84872	0.0183024
487	NM_001628>AKR1B1	AKR1B1	1.3361	0.300064
488	NM_020299>AKR1B10	AKR1B10	0.911498	0.759227
489	NM_001080538>AKR1B15	AKR1B15	1.17167	0.373901
490	NM_001353>AKR1C1	AKR1C1	13.0072	0.00380812
491	NM_205845>AKR1C2	AKR1C2	3.60786	0.0194225
492	NM_003739>AKR1C3	AKR1C3	2.61046	0.184251
493	NM_001818>AKR1C4	AKR1C4	0.855862	0.373901
494	NR_027916>AKR1CL1	AKR1CL1	1.14491	0.15767
495	NM_005989>AKR1D1	AKR1D1	1.00108	0.894471
496	NM_003689>AKR7A2	AKR7A2	0.747389	0.106804
497	NR_002796>AKR7A2P1	AKR7A2P1	0.643054	0.318477
498	NM_012067>AKR7A3	AKR7A3	1.01975	0.955824
499	NR_040288>AKR7L	AKR7L	2.07573	0.0655336
500	NM_005163>AKT1	AKT1	0.610754	0.155118
501	NM_001098633>AKT1S1	AKT1S1	1.0936	0.674872
502	NM_001243028>AKT2	AKT2	0.760892	0.0903693
503	NM_005465>AKT3	AKT3	1.05863	0.625603
504	NM_022476>AKTIP	AKTIP	0.509434	0.0186794
505	NM_000031>ALAD	ALAD	0.730609	0.163211
506	NM_199166>ALAS1	ALAS1	0.845434	0.0926796
507	NM_000032>ALAS2	ALAS2	0.999744	0.95422
508	NM_000477>ALB	ALB	1.40157	0.245951
509	NM_001243281>ALCAM	ALCAM	2.09296	0.103517
510	NM_153329>ALDH16A1	ALDH16A1	0.545037	0.0751051
511	NM_002860>ALDH18A1	ALDH18A1	1.12842	0.466543
512	NM_000689>ALDH1A1	ALDH1A1	19.7152	0.000776745
513	NM_170697>ALDH1A2	ALDH1A2	0.752767	0.17556
514	NM_000693>ALDH1A3	ALDH1A3	0.27682	0.0340913
515	NM_000692>ALDH1B1	ALDH1B1	0.720544	0.155296
516	NM_001270364>ALDH1L1	ALDH1L1	1.01748	0.000145913
517	NR_046383>ALDH1L1-AS2	ALDH1L1-AS2	0.988201	0.942539
518	NR_027752>ALDH1L2	ALDH1L2	1.72966	0.00624334
519	NM_000690>ALDH2	ALDH2	1.2877	0.670306
520	NM_001135168>ALDH3A1	ALDH3A1	0.980012	0.00456864
521	NM_000382>ALDH3A2	ALDH3A2	0.767531	0.148102
522	NM_000694>ALDH3B1	ALDH3B1	0.482444	0.0515466
523	NM_000695>ALDH3B2	ALDH3B2	0.954202	0.561631
524	NM_003748>ALDH4A1	ALDH4A1	0.23654	0.0312129
525	NM_001080>ALDH5A1	ALDH5A1	0.232931	0.000380084
526	NM_005589>ALDH6A1	ALDH6A1	0.364448	0.0226442
527	NM_001202404>ALDH7A1	ALDH7A1	0.612425	0.363312
528	NM_001193480>ALDH8A1	ALDH8A1	1.79209	0.194655
529	NM_000696>ALDH9A1	ALDH9A1	0.994202	0.951752
530	NM_000034>ALDOA	ALDOA	0.503283	0.0504303
531	NM_000035>ALDOB	ALDOB	1.06975	0.668746
532	NM_005165>ALDOC	ALDOC	0.798195	0.790093
533	NM_019109>ALG1	ALG1	1.02322	0.898889
534	NM_032834>ALG10	ALG10	0.872015	0.457075
535	NM_001013620>ALG10B	ALG10B	0.969294	0.866568
536	NM_001004127>ALG11	ALG11	1.79848	0.0648457
537	NM_024105>ALG12	ALG12	1.27098	0.236371
538	NM_001257234>ALG13	ALG13	0.545227	0.0399633
539	NM_144988>ALG14	ALG14	0.891266	0.472426
540	NM_001195223>ALG1L	ALG1L	1.20011	0.360399
541	NM_001136152>ALG1L2	ALG1L2	1.51544	0.559028
542	NR_073386>ALG1L9P	ALG1L9P	1.51408	0.273672
543	NR_024532>ALG2	ALG2	1.07306	0.688017
544	NR_024534>ALG3	ALG3	0.573509	0.0389399
545	NM_001142364>ALG5	ALG5	1.59207	0.683206
546	NM_013339>ALG6	ALG6	0.928264	0.536476
547	NM_001007027>ALG8	ALG8	3.95554	0.170832
548	NM_001077691>ALG9	ALG9	1.20877	0.497007
549	NM_004304>ALK	ALK	1.22984	0.0924208
550	NM_006020>ALKBH1	ALKBH1	1.03758	0.75334
551	NM_001145375>ALKBH2	ALKBH2	2.06032	0.178415
552	NM_139178>ALKBH3	ALKBH3	0.997078	0.987563
553	NM_017621>ALKBH4	ALKBH4	0.896778	0.526659
554	NM_017758>ALKBH5	ALKBH5	1.03831	0.574614
555	NM_198867>ALKBH6	ALKBH6	0.331335	0.225931
556	NM_032306>ALKBH7	ALKBH7	0.802635	0.323646
557	NM_138775>ALKBH8	ALKBH8	1.03607	0.879198
558	NM_018436>ALLC	ALLC	0.951781	0.725607
559	NM_015120>ALMS1	ALMS1	0.704436	0.121159
560	NR_003683>ALMS1P	ALMS1P	0.932587	0.701675
561	NM_000697>ALOX12	ALOX12	1.66136	0.0287813
562	NM_001139>ALOX12B	ALOX12B	0.931881	0.373901
563	NR_002710>ALOX12P2	ALOX12P2	2.31272	0.0401402
564	NM_001140>ALOX15	ALOX15	1.01565	0.889809
565	NM_001039131>ALOX15B	ALOX15B	0.886831	0.373901
566	NM_000698>ALOX5	ALOX5	0.996467	0.373901
567	NM_001629>ALOX5AP	ALOX5AP	4.98927	0.00576784
568	NM_001165960>ALOXE3	ALOXE3	0.972087	0.595939
569	NM_025144>ALPK1	ALPK1	0.604205	0.341947
570	NM_052947>ALPK2	ALPK2	0.802699	0.225086
571	NM_020778>ALPK3	ALPK3	1.30186	0.401417
572	NM_001177520>ALPL	ALPL	2.41513	0.0404227
573	NM_001632>ALPP	ALPP	1.03194	0.798559
574	NM_031313>ALPPL2	ALPPL2	1.16128	0.592104
575	NM_020919>ALS2	ALS2	1.14064	0.108973
576	NR_033815>ALS2CL	ALS2CL	1.1453	0.372226
577	NM_001168216>ALS2CR11	ALS2CR11	1.06407	0.373901
578	NM_139163>ALS2CR12	ALS2CR12	1.01405	0.882217
579	NM_001104586>ALS2CR8	ALS2CR8	1.45467	0.316565
580	NM_006982>ALX1	ALX1	1.19771	0.373901
581	NM_006492>ALX3	ALX3	1.22923	0.445293
582	NM_021926>ALX4	ALX4	16.9736	0.00241518
583	NM_005782>ALYREF	ALYREF	0.645625	0.191665
584	NM_014324>AMACR	AMACR	0.309314	0.000311528
585	NM_016519>AMBN	AMBN	0.881051	0.272423
586	NM_001633>AMBP	AMBP	0.811059	0.493762
587	NM_001267783>AMBRA1	AMBRA1	0.896017	0.457921
588	NM_001634>AMD1	AMD1	1.01542	0.891801
589	NM_152435>AMDHD1	AMDHD1	0.490773	0.0929413
590	NM_015944>AMDHD2	AMDHD2	1.29755	0.236507
591	NM_152424>AMER1	AMER1	0.513036	0.0112935
592	NM_152698>AMER3	AMER3	1.00138	0.878621
593	NM_001144>AMFR	AMFR	0.956332	0.279615
594	NM_000479>AMH	AMH	1.01759	0.94239
595	NM_020547>AMHR2	AMHR2	0.999968	0.360039
596	NM_153206>AMICA1	AMICA1	0.999608	0.707612
597	NM_020703>AMIGO1	AMIGO1	0.538569	0.03432
598	NM_001143668>AMIGO2	AMIGO2	1.69294	0.305268
599	NM_198722>AMIGO3	AMIGO3	1.07524	0.74971
600	NM_001025580>AMMECR1	AMMECR1	1.42966	0.524203
601	NM_001199140>AMMECR1L	AMMECR1L	1.18681	0.257951
602	NM_030943>AMN	AMN	1.04724	0.739205
603	NR_004854>AMN1	AMN1	3.24053	0.0605865
604	NM_133265>AMOT	AMOT	0.141801	0.000253897
605	NM_130847>AMOTL1	AMOTL1	0.88629	0.638639
606	NM_016201>AMOTL2	AMOTL2	0.760166	0.268683
607	NM_001172626>AMPD1	AMPD1	0.335031	0.196839
608	NM_139156>AMPD2	AMPD2	2.04251	0.155152
609	NM_000480>AMPD3	AMPD3	1.29306	0.00272132
610	NM_001635>AMPH	AMPH	2.98603	0.0440461
611	NM_001164711>AMT	AMT	0.429006	0.00225051
612	NM_212557>AMTN	AMTN	1.0944	0.373901
613	NM_001008221.1>AMY1A	AMY1A	0.968332	0.82072
614	NM_001008218>AMY1B	AMY1B	1	?
615	NM_001008219.1>AMY1C	AMY1C	1	?
616	NM_000699>AMY2A	AMY2A	1	?
617	NM_020978>AMY2B	AMY2B	0.681489	0.177879
618	NM_133463>AMZ1	AMZ1	7.53873	0.00272177
619	NM_001033569>AMZ2	AMZ2	0.715521	0.0182421
620	NR_026903>AMZ2P1	AMZ2P1	1.04238	0.880254
621	NM_022662>ANAPC1	ANAPC1	1.00068	0.993635
622	NR_046345>ANAPC10	ANAPC10	1.07765	0.321975
623	NM_001002244>ANAPC11	ANAPC11	0.409157	0.00299751
624	NM_001242375>ANAPC13	ANAPC13	2.78467	0.0984622
625	NM_014042>ANAPC15	ANAPC15	0.786985	0.124878
626	NR_038392>ANAPC16	ANAPC16	0.546737	0.268016
627	NR_037931>ANAPC1P1	ANAPC1P1	0.564502	0.238057
628	NM_013366>ANAPC2	ANAPC2	0.685517	0.0688192
629	NM_013367>ANAPC4	ANAPC4	0.824173	0.0887676
630	NM_016237>ANAPC5	ANAPC5	1.16805	0.391871
631	NM_016238>ANAPC7	ANAPC7	0.861551	0.28979
632	NM_001097577>ANG	ANG	2.81942	0.20533
633	NM_015305>ANGEL1	ANGEL1	1.40035	0.0786818
634	NM_144567>ANGEL2	ANGEL2	0.848716	0.179928
635	NM_001199859>ANGPT1	ANGPT1	3.38772	0.0608497
636	NM_001118887>ANGPT2	ANGPT2	1.04897	0.0987673
637	NM_015985>ANGPT4	ANGPT4	2.61802	0.0235873
638	NM_004673>ANGPTL1	ANGPTL1	0.970006	0.669782
639	NM_012098>ANGPTL2	ANGPTL2	3.3039	0.0247152
640	NM_014495>ANGPTL3	ANGPTL3	0.921632	0.373901
641	NM_139314>ANGPTL4	ANGPTL4	2.17585	0.0632149
642	NM_178127>ANGPTL5	ANGPTL5	0.956544	0.373901
643	NM_031917>ANGPTL6	ANGPTL6	1.08483	0.643277
644	NM_021146>ANGPTL7	ANGPTL7	0.922935	0.373901
645	NM_001191054>ANHX	ANHX	1.05534	0.373901
646	NM_020477>ANK1	ANK1	0.268961	0.0346469
647	NM_020977>ANK2	ANK2	0.540043	0.201754
648	NM_001204404>ANK3	ANK3	1.95981	0.180233
649	NM_144708>ANKAR	ANKAR	1.10278	0.384517
650	NM_182703>ANKDD1A	ANKDD1A	1.4624	0.0345272
651	NM_001271529>ANKDD1B	ANKDD1B	1.5674	0.182139
652	NM_153228>ANKFN1	ANKFN1	1.93196	0.155419
653	NM_001257999>ANKFY1	ANKFY1	0.73405	0.495829
654	NM_054027>ANKH	ANKH	2.17487	0.0320148
655	NM_024668>ANKHD1	ANKHD1	0.492533	0.0551645
656	NM_020690>ANKHD1-EIF4EBP3	ANKHD1-EIF4EBP3	0.94594	0.913856
657	NM_019004>ANKIB1	ANKIB1	0.97208	0.71417
658	NM_178510>ANKK1	ANKK1	1.10777	0.792848
659	NM_152363>ANKLE1	ANKLE1	1.1035	0.594737
660	NM_015114>ANKLE2	ANKLE2	1.17848	0.334534
661	NM_016552>ANKMY1	ANKMY1	0.795102	0.425765
662	NM_020319>ANKMY2	ANKMY2	1.10517	0.431403
663	NM_023039>ANKRA2	ANKRA2	0.895039	0.625987
664	NM_014391>ANKRD1	ANKRD1	2.0002	0.241168
665	NM_017664>ANKRD10	ANKRD10	1.0083	0.933621
666	NR_045839>ANKRD11	ANKRD11	1.17208	0.269403
667	NM_001083625>ANKRD12	ANKRD12	1.11515	0.534228
668	NM_033121>ANKRD13A	ANKRD13A	1.45241	0.519052
669	NM_152345>ANKRD13B	ANKRD13B	0.543716	0.0200678
670	NM_030816>ANKRD13C	ANKRD13C	1.026	0.82362
671	NR_030767>ANKRD13D	ANKRD13D	1.11769	0.780223
672	NM_001009941>ANKRD16	ANKRD16	0.484428	0.373901
673	NM_198889>ANKRD17	ANKRD17	0.990081	0.924693
674	NM_147195>ANKRD18A	ANKRD18A	0.977721	0.85794
675	NM_001244752>ANKRD18B	ANKRD18B	2.24183	0.0653978
676	NR_003291>ANKRD18DP	ANKRD18DP	0.760251	0.158646
677	NR_026868>ANKRD19P	ANKRD19P	0.611454	0.32294
678	NM_020349>ANKRD2	ANKRD2	0.823812	0.303345
679	NM_032250>ANKRD20A1	ANKRD20A1	0.558515	0.197551
680	NR_027270>ANKRD20A11P	ANKRD20A11P	1.43888	0.116936
681	NR_046228>ANKRD20A12P	ANKRD20A12P	1.71947	0.0568725
682	NR_073430>ANKRD20A19P	ANKRD20A19P	1.06295	0.730734
683	NM_001012421>ANKRD20A2	ANKRD20A2	0.34212	0.109663
684	NM_001012419.2>ANKRD20A3	ANKRD20A3	0.69225	0.404937
685	NM_001098805>ANKRD20A4	ANKRD20A4	0.997692	0.37473
686	NR_040113>ANKRD20A5P	ANKRD20A5P	0.950521	0.687633
687	NR_003366>ANKRD20A8P	ANKRD20A8P	1.06148	0.813417
688	NR_027995>ANKRD20A9P	ANKRD20A9P	1.00579	0.912214
689	NM_144590>ANKRD22	ANKRD22	1.44246	0.104987
690	NM_144994>ANKRD23	ANKRD23	1.04311	0.87265
691	NM_133475>ANKRD24	ANKRD24	0.96067	0.565277
692	NM_014915>ANKRD26	ANKRD26	0.79486	0.0842103
693	NR_026556>ANKRD26P1	ANKRD26P1	0.92843	0.581339
694	NM_032139>ANKRD27	ANKRD27	0.912386	0.241355
695	NM_001195099>ANKRD28	ANKRD28	0.854389	0.555409
696	NM_173505>ANKRD29	ANKRD29	1.8313	0.0354521
697	NM_052997>ANKRD30A	ANKRD30A	1.62609	0.00850039
698	NM_001145029>ANKRD30B	ANKRD30B	2.134	0.00320273
699	NR_027020>ANKRD30BL	ANKRD30BL	3.3023	0.341229
700	NR_026916>ANKRD30BP2	ANKRD30BP2	1.09736	0.581929
701	NM_001164443>ANKRD31	ANKRD31	0.97044	0.412311
702	NM_032290>ANKRD32	ANKRD32	0.855475	0.501252
703	NM_182608>ANKRD33	ANKRD33	1.11384	0.373901
704	NM_001164440>ANKRD33B	ANKRD33B	0.70435	0.104518
705	NM_001039888>ANKRD34A	ANKRD34A	1.352	0.345813
706	NM_001004441>ANKRD34B	ANKRD34B	0.879333	0.104199
707	NM_001146341>ANKRD34C	ANKRD34C	0.998371	0.955317
708	NM_144698>ANKRD35	ANKRD35	1.23543	0.0617758
709	NM_001164315>ANKRD36	ANKRD36	1.16663	0.147732
710	NM_025190>ANKRD36B	ANKRD36B	1.03355	0.730385
711	NR_026844>ANKRD36BP1	ANKRD36BP1	0.907883	0.773135
712	NR_015424>ANKRD36BP2	ANKRD36BP2	1.11746	0.373901
713	NM_181726>ANKRD37	ANKRD37	1.06568	0.881527
714	NM_016466>ANKRD39	ANKRD39	0.845254	0.394365
715	NM_052855>ANKRD40	ANKRD40	0.655603	0.0103569
716	NM_182603>ANKRD42	ANKRD42	1.53256	0.17712
717	NM_001195144>ANKRD44	ANKRD44	1.32009	0.182018
718	NM_198493>ANKRD45	ANKRD45	0.412776	0.031761
719	NM_001270379>ANKRD46	ANKRD46	0.635181	0.150852
720	NM_017704>ANKRD49	ANKRD49	0.989487	0.939258
721	NM_198798>ANKRD5	ANKRD5	1.35732	0.468456
722	NM_020337>ANKRD50	ANKRD50	0.677119	0.416393
723	NM_173595>ANKRD52	ANKRD52	1.05513	0.775882
724	NM_024933>ANKRD53	ANKRD53	0.796702	0.342498
725	NR_036556>ANKRD54	ANKRD54	0.875354	0.719273
726	NM_024669>ANKRD55	ANKRD55	0.653806	0.0824588
727	NM_001242811>ANKRD6	ANKRD6	0.899417	0.203554
728	NM_001271700>ANKRD61	ANKRD61	1.08828	0.419331
729	NR_040115>ANKRD62P1-PARP4P3	ANKRD62P1-PARP4P3	1.13393	0.373901
730	NM_001190479>ANKRD63	ANKRD63	0.59198	0.278769
731	NM_001243535>ANKRD65	ANKRD65	0.721734	0.26678
732	NM_152326>ANKRD9	ANKRD9	0.68394	0.451138
733	NM_015245>ANKS1A	ANKS1A	0.958545	0.826057
734	NM_152788>ANKS1B	ANKS1B	0.740126	0.00629578
735	NM_001242929>ANKS3	ANKS3	1.16164	0.387879
736	NM_145865>ANKS4B	ANKS4B	1.13288	0.373901
737	NM_173551>ANKS6	ANKS6	0.785043	0.135092
738	NM_001144960>ANKUB1	ANKUB1	0.743861	0.0766561
739	NM_001042410>ANKZF1	ANKZF1	1.14039	0.684438
740	NM_018685>ANLN	ANLN	0.788086	0.158367
741	NM_018043>ANO1	ANO1	1.72368	0.100954
742	NM_001204831>ANO10	ANO10	5.24113	0.0100466
743	NM_020373>ANO2	ANO2	1.02702	0.373901
744	NM_031418>ANO3	ANO3	0.878785	0.266497
745	NM_178826>ANO4	ANO4	0.991904	0.9676
746	NM_001142649>ANO5	ANO5	0.97251	0.492944
747	NM_001204803>ANO6	ANO6	1.57012	0.0909315
748	NM_001001891>ANO7	ANO7	0.947811	0.78463
749	NM_020959>ANO8	ANO8	1.15518	0.716928
750	NM_001012302>ANO9	ANO9	1.21491	0.251501
751	NM_006305>ANP32A	ANP32A	0.600609	0.0410072
752	NR_026808>ANP32A-IT1	ANP32A-IT1	0.713468	0.129046
753	NR_003144>ANP32AP1	ANP32AP1	0.641273	0.0368143
754	NM_006401>ANP32B	ANP32B	0.590342	0.0715191
755	NM_012403>ANP32C	ANP32C	0.516849	0.0526973
756	NM_012404>ANP32D	ANP32D	0.513413	0.253251
757	NM_030920>ANP32E	ANP32E	0.827407	0.349581
758	NM_001150>ANPEP	ANPEP	9.91084	0.000671973
759	NM_018153>ANTXR1	ANTXR1	4.15063	0.00116247
760	NM_058172>ANTXR2	ANTXR2	3.82234	0.00559093
761	NM_000700>ANXA1	ANXA1	0.622896	0.018061
762	NM_007193>ANXA10	ANXA10	1.58314	0.182795
763	NM_145868>ANXA11	ANXA11	0.696501	0.0870009
764	NM_004306>ANXA13	ANXA13	0.517162	0.0290727
765	NM_001002857>ANXA2	ANXA2	0.47371	0.0173636
766	NR_001562>ANXA2P1	ANXA2P1	0.614559	0.0281766
767	NR_003573>ANXA2P2	ANXA2P2	0.659627	0.041879
768	NR_001446>ANXA2P3	ANXA2P3	2.5192	0.529361
769	NM_001014279>ANXA2R	ANXA2R	0.961967	0.955388
770	NM_005139>ANXA3	ANXA3	0.49999	0.191384
771	NM_001153>ANXA4	ANXA4	0.911782	0.555861
772	NM_001154>ANXA5	ANXA5	1.11351	0.714194
773	NM_001193544>ANXA6	ANXA6	14.2579	0.00385904
774	NM_001156>ANXA7	ANXA7	0.866909	0.0634099
775	NM_001271703.1>ANXA8	ANXA8	2.35295	0.0313784
776	NM_001098845.1>ANXA8L1	ANXA8L1	5.47039	0.119146
777	NM_001630>ANXA8L2	ANXA8L2	3.77626	0.11519
778	NM_003568>ANXA9	ANXA9	1.52918	0.249788
779	NM_001177507>AOAH	AOAH	1.26148	0.150638
780	NR_046764>AOAH-IT1	AOAH-IT1	0.785618	0.373901
781	NM_001158>AOC2	AOC2	1.65484	0.3246
782	NM_003734>AOC3	AOC3	1.17654	0.619871
783	NR_002773>AOC4	AOC4	1.11021	0.373901
784	NM_001159>AOX1	AOX1	4.76736	0.0772696
785	NM_018569>AP1AR	AP1AR	0.878661	0.699468
786	NM_145730>AP1B1	AP1B1	0.746157	0.308379
787	NM_001128>AP1G1	AP1G1	0.711225	0.00848199
788	NM_003917>AP1G2	AP1G2	0.989593	0.972752
789	NM_032493>AP1M1	AP1M1	0.797231	0.2827
790	NM_005498>AP1M2	AP1M2	1.02787	0.968386
791	NM_001283>AP1S1	AP1S1	1.17448	0.0439499
792	NM_003916>AP1S2	AP1S2	0.578212	0.199072
793	NM_001039569>AP1S3	AP1S3	0.422459	0.000712927
794	NM_130787>AP2A1	AP2A1	0.765092	0.216278
795	NM_001242837>AP2A2	AP2A2	1.45714	0.0113802
796	NM_001030006>AP2B1	AP2B1	0.689595	0.0311114
797	NM_004068>AP2M1	AP2M1	1.46925	0.039858
798	NM_004069>AP2S1	AP2S1	1.17195	0.114791
799	NM_001271769>AP3B1	AP3B1	1.73363	0.131023
800	NM_004644>AP3B2	AP3B2	0.987466	0.934292
801	NM_003938>AP3D1	AP3D1	1.09766	0.42155
802	NM_012095>AP3M1	AP3M1	0.680634	0.0728287
803	NM_006803>AP3M2	AP3M2	0.70279	0.0123802
804	NM_001284>AP3S1	AP3S1	1.06235	0.867946
805	NR_023361>AP3S2	AP3S2	0.718199	0.227405
806	NM_001253852>AP4B1	AP4B1	1.16658	0.0631448
807	NR_037864>AP4B1-AS1	AP4B1-AS1	1.24967	0.154937
808	NM_001252127>AP4E1	AP4E1	0.789101	0.000246245
809	NM_004722>AP4M1	AP4M1	0.681858	0.104897
810	NM_001254726>AP4S1	AP4S1	0.757289	0.295028
811	NM_138368>AP5B1	AP5B1	0.859864	0.440826
812	NR_026895>AP5M1	AP5M1	0.559821	0.721836
813	NM_001204446>AP5S1	AP5S1	0.25877	0.0442967
814	NM_014855>AP5Z1	AP5Z1	1.55437	0.0467755
815	NM_013229>APAF1	APAF1	1.85354	0.0476766
816	NM_001163>APBA1	APBA1	1.03028	0.84621
817	NM_001130414>APBA2	APBA2	0.367922	0.0183973
818	NM_004886>APBA3	APBA3	1.21227	0.285304
819	NM_145689>APBB1	APBB1	0.319794	0.0749756
820	NM_173075>APBB2	APBB2	4.16043	0.00161431
821	NM_133173>APBB3	APBB3	1.85957	0.114894
822	NM_001127510>APC	APC	0.536886	0.00836605
823	NM_005883>APC2	APC2	1.71587	0.0715569
824	NM_153000>APCDD1	APCDD1	1.55939	0.491771
825	NM_153360>APCDD1L	APCDD1L	63.2475	0.000876759
826	NR_034147>APCDD1L-AS1	APCDD1L-AS1	22.3588	0.00098509
827	NM_001640>APEH	APEH	0.586809	0.0353177
828	NM_001641>APEX1	APEX1	0.641987	0.328448
829	NM_014481>APEX2	APEX2	0.808705	0.367034
830	NM_001243772>APH1A	APH1A	0.675903	0.337936
831	NM_001145646>APH1B	APH1B	1.91236	0.110048
832	NM_006595>API5	API5	1.24518	0.445303
833	NM_015957>APIP	APIP	1.05013	0.873485
834	NM_199294>APITD1	APITD1	0.411617	0.00113925
835	NR_037187>APITD1-CORT	APITD1-CORT	1.56782	0.34256
836	NM_173545>APLF	APLF	2.80856	0.0149823
837	NM_017413>APLN	APLN	1.38663	0.375692
838	NR_027991>APLNR	APLNR	1.30498	0.322431
839	NM_001024807>APLP1	APLP1	2.14044	0.0237494
840	NM_001642>APLP2	APLP2	1.23158	0.218683
841	NM_020531>APMAP	APMAP	1.13392	0.0210436
842	NM_000039>APOA1	APOA1	0.994178	0.992474
843	NM_144772>APOA1BP	APOA1BP	0.753497	0.0330098
844	NM_001643>APOA2	APOA2	1.32168	0.373901
845	NM_000482>APOA4	APOA4	1.07816	0.65497
846	NM_001166598>APOA5	APOA5	1.06572	0.373901
847	NM_000384>APOB	APOB	1.0404	0.0122112
848	NM_006789>APOBEC2	APOBEC2	1.09187	0.594288
849	NM_145699>APOBEC3A	APOBEC3A	1.00328	0.921003
850	NM_004900>APOBEC3B	APOBEC3B	0.996846	0.784647
851	NM_014508>APOBEC3C	APOBEC3C	1.62692	0.137883
852	NM_152426>APOBEC3D	APOBEC3D	1.62974	0.298259
853	NM_001006666>APOBEC3F	APOBEC3F	1.41697	0.522365
854	NM_021822>APOBEC3G	APOBEC3G	1.17016	0.711596
855	NM_018690>APOBR	APOBR	0.883111	0.356255
856	NM_001645>APOC1	APOC1	0.793591	0.388069
857	NR_028414>APOC1P1	APOC1P1	1.25589	0.373901
858	NM_000040>APOC3	APOC3	0.780094	0.373901
859	NM_001647>APOD	APOD	1.01336	0.952097
860	NM_000041>APOE	APOE	3.78421	0.068052
861	NM_003661>APOL1	APOL1	6.34905	0.0195588
862	NM_145637>APOL2	APOL2	1.36234	0.157196
863	NM_145640>APOL3	APOL3	2.96759	0.121672
864	NM_030643>APOL4	APOL4	1.13185	0.274724
865	NM_030641>APOL6	APOL6	1.16327	0.79674
866	NM_030817>APOLD1	APOLD1	1.53451	0.421866
867	NM_001256169.2>APOM	APOM	0.56421	0.246846
868	NR_026545>APOO	APOO	0.357803	0.330539
869	NM_198450>APOOL	APOOL	1.16686	0.413493
870	NM_032374>APOPT1	APOPT1	0.936492	0.590694
871	NM_001204301>APP	APP	2.02614	0.147827
872	NM_006380>APPBP2	APPBP2	1.05024	0.652038
873	NM_012096>APPL1	APPL1	0.733818	0.0203578
874	NM_001251904>APPL2	APPL2	2.313	0.11318
875	NM_000485>APRT	APRT	0.787824	0.279812
876	NR_036579>APTX	APTX	0.439559	0.00296492
877	NM_198098>AQP1	AQP1	2.83688	0.165818
878	NM_080429>AQP10	AQP10	1.11018	0.373901
879	NM_173039>AQP11	AQP11	0.366003	0.00432108
880	NM_000486>AQP2	AQP2	0.890168	0.139153
881	NM_004925>AQP3	AQP3	1.28819	0.249595
882	NM_004028>AQP4	AQP4	0.923312	1.49525e-05
883	NR_026908>AQP4-AS1	AQP4-AS1	1.09469	0.373901
884	NM_001651>AQP5	AQP5	0.590429	0.0628368
885	NM_001652>AQP6	AQP6	0.784758	0.266501
886	NM_001170>AQP7	AQP7	0.981491	0.954645
887	NR_002817>AQP7P1	AQP7P1	1.68787	0.0994434
888	NR_026558>AQP7P3	AQP7P3	1.64738	0.0560023
889	NM_001169>AQP8	AQP8	1.07336	0.373901
890	NM_020980>AQP9	AQP9	1.0724	0.674534
891	NM_173800>AQPEP	AQPEP	1.21948	0.190834
892	NM_014691>AQR	AQR	0.65124	0.030445
893	NM_001011645>AR	AR	2.12153	0.175491
894	NM_001256197>ARAF	ARAF	1.31746	0.256244
895	NM_001040118>ARAP1	ARAP1	2.38171	0.0765939
896	NM_015230>ARAP2	ARAP2	0.533255	0.0587392
897	NM_022481>ARAP3	ARAP3	0.854334	0.398346
898	NM_015193>ARC	ARC	1.21741	0.446676
899	NM_001655>ARCN1	ARCN1	1.47918	0.04656
900	NM_001024227>ARF1	ARF1	3.98823	0.0322518
901	NM_001659>ARF3	ARF3	1.01712	0.820523
902	NM_001660>ARF4	ARF4	1.78894	0.0966616
903	NM_001662>ARF5	ARF5	0.669485	0.00807924
904	NM_001663>ARF6	ARF6	0.984179	0.92644
905	NM_018209>ARFGAP1	ARFGAP1	1.72318	0.0811494
906	NM_032389>ARFGAP2	ARFGAP2	0.611232	0.336551
907	NM_014570>ARFGAP3	ARFGAP3	1.67171	0.00679953
908	NM_006421>ARFGEF1	ARFGEF1	0.952469	0.67961
909	NM_006420>ARFGEF2	ARFGEF2	1.38544	0.0673508
910	NM_014447>ARFIP1	ARFIP1	0.706584	0.627805
911	NM_001242854>ARFIP2	ARFIP2	2.37122	0.0511379
912	NR_051956>ARFRP1	ARFRP1	1.83477	0.0273563
913	NM_000045>ARG1	ARG1	0.922019	0.373901
914	NM_001172>ARG2	ARG2	2.35951	0.000317104
915	NM_001012659>ARGFX	ARGFX	1.03918	0.373901
916	NR_002222>ARGFXP2	ARGFXP2	1.24183	0.27593
917	NM_018011>ARGLU1	ARGLU1	0.92601	0.282142
918	NM_004308>ARHGAP1	ARHGAP1	0.997734	0.988324
919	NM_024605>ARHGAP10	ARHGAP10	0.752699	0.411803
920	NM_014783>ARHGAP11A	ARHGAP11A	0.631573	0.0116087
921	NM_001039841>ARHGAP11B	ARHGAP11B	0.667001	0.22519
922	NM_001270696>ARHGAP12	ARHGAP12	0.570103	0.083656
923	NM_018054>ARHGAP17	ARHGAP17	1.3515	0.209131
924	NM_033515>ARHGAP18	ARHGAP18	0.615742	0.00274903
925	NM_001204300>ARHGAP19	ARHGAP19	0.700729	0.204749
926	NR_037909>ARHGAP19-SLIT1	ARHGAP19-SLIT1	1	?
927	NM_001258417>ARHGAP20	ARHGAP20	1.78228	0.100511
928	NM_020824>ARHGAP21	ARHGAP21	0.938892	0.512683
929	NM_001256025>ARHGAP22	ARHGAP22	2.30325	0.0490618
930	NM_001199417>ARHGAP23	ARHGAP23	1.93113	0.0643052
931	NM_001042669>ARHGAP24	ARHGAP24	9.17354	0.000284737
932	NM_014882>ARHGAP25	ARHGAP25	2.30954	0.0585381
933	NM_001135608>ARHGAP26	ARHGAP26	0.479357	0.0154981
934	NM_199282>ARHGAP27	ARHGAP27	0.710717	0.264901
935	NM_001010000>ARHGAP28	ARHGAP28	2.04085	0.132817
936	NM_004815>ARHGAP29	ARHGAP29	0.789082	0.139529
937	NM_001025598>ARHGAP30	ARHGAP30	2.7443	0.00705369
938	NM_020754>ARHGAP31	ARHGAP31	2.61871	0.00331489
939	NM_014715>ARHGAP32	ARHGAP32	1.48969	0.140558
940	NM_001172630>ARHGAP33	ARHGAP33	1.23723	0.623811
941	NM_004491>ARHGAP35	ARHGAP35	1.01923	0.926345
942	NM_144967>ARHGAP36	ARHGAP36	0.193609	0.0231845
943	NM_025251>ARHGAP39	ARHGAP39	0.73373	0.299215
944	NM_001666>ARHGAP4	ARHGAP4	0.945041	0.860913
945	NM_001164431>ARHGAP40	ARHGAP40	1.00675	0.946345
946	NM_152432>ARHGAP42	ARHGAP42	1.66128	0.04147
947	NM_014859>ARHGAP44	ARHGAP44	0.965571	0.78401
948	NM_001173>ARHGAP5	ARHGAP5	0.793892	0.017079
949	NR_027263>ARHGAP5-AS1	ARHGAP5-AS1	0.833332	0.423565
950	NM_013427>ARHGAP6	ARHGAP6	1.71518	0.0311976
951	NM_001017526>ARHGAP8	ARHGAP8	0.999704	0.373901
952	NM_001080157>ARHGAP9	ARHGAP9	2.38772	2.00493e-06
953	NM_004309>ARHGDIA	ARHGDIA	0.844817	0.332182
954	NM_001175>ARHGDIB	ARHGDIB	3.95501	0.0100553
955	NM_001176>ARHGDIG	ARHGDIG	0.934865	0.737854
956	NM_004706>ARHGEF1	ARHGEF1	0.641248	0.14836
957	NM_014629>ARHGEF10	ARHGEF10	1.08674	0.714902
958	NM_001011722>ARHGEF10L	ARHGEF10L	1.91869	0.0618191
959	NM_014784>ARHGEF11	ARHGEF11	1.29791	0.0184
960	NM_015313>ARHGEF12	ARHGEF12	1.18302	0.593416
961	NM_025014>ARHGEF15	ARHGEF15	1.06022	0.18753
962	NM_014448>ARHGEF16	ARHGEF16	0.4221	0.0881913
963	NM_014786>ARHGEF17	ARHGEF17	1.61995	0.232622
964	NM_015318>ARHGEF18	ARHGEF18	1.12494	0.413616
965	NM_153213>ARHGEF19	ARHGEF19	0.688836	0.0349695
966	NM_004723>ARHGEF2	ARHGEF2	2.89868	0.00661635
967	NM_001111270>ARHGEF25	ARHGEF25	2.01219	0.0369732
968	NM_001251962>ARHGEF26	ARHGEF26	0.747331	0.0810714
969	NR_037901>ARHGEF26-AS1	ARHGEF26-AS1	1.10575	0.699663
970	NM_001244364>ARHGEF28	ARHGEF28	0.242534	0.0339328
971	NM_001128615>ARHGEF3	ARHGEF3	1.49216	0.0379996
972	NM_001145451>ARHGEF33	ARHGEF33	0.89846	0.128336
973	NM_001003702>ARHGEF35	ARHGEF35	1.04244	0.843848
974	NM_001001669>ARHGEF37	ARHGEF37	0.657426	0.388035
975	NM_001242729>ARHGEF38	ARHGEF38	0.921016	0.742236
976	NM_032818>ARHGEF39	ARHGEF39	0.378716	0.00753046
977	NM_015320>ARHGEF4	ARHGEF4	0.162694	0.0133029
978	NM_018071>ARHGEF40	ARHGEF40	2.44606	0.0295985
979	NM_005435>ARHGEF5	ARHGEF5	1.0939	0.78623
980	NM_004840>ARHGEF6	ARHGEF6	1.59192	0.123742
981	NM_001113511>ARHGEF7	ARHGEF7	1.06441	0.117737
982	NM_001173479>ARHGEF9	ARHGEF9	1.18234	0.524574
983	NM_139135>ARID1A	ARID1A	0.779371	0.623842
984	NM_020732>ARID1B	ARID1B	1.11054	0.233901
985	NM_152641>ARID2	ARID2	0.763694	0.00894919
986	NM_005224>ARID3A	ARID3A	1.51587	0.116655
987	NM_006465>ARID3B	ARID3B	0.314716	0.00387524
988	NM_001017363>ARID3C	ARID3C	1.02852	0.921526
989	NM_023000>ARID4A	ARID4A	1.68187	0.0221148
990	NM_031371>ARID4B	ARID4B	1.47422	0.214673
991	NM_212481>ARID5A	ARID5A	1.5825	0.0308999
992	NM_001244638>ARID5B	ARID5B	0.743067	0.0684883
993	NM_005744>ARIH1	ARIH1	0.659453	0.00216668
994	NM_006321>ARIH2	ARIH2	0.900536	0.0546633
995	NM_001123040>ARIH2OS	ARIH2OS	0.993336	0.980403
996	NM_001177>ARL1	ARL1	1.39504	0.120181
997	NM_173664>ARL10	ARL10	1.1299	0.810321
998	NM_138450>ARL11	ARL11	1.05212	0.373901
999	NM_001012990>ARL13A	ARL13A	0.999794	0.373901
1000	NM_182896>ARL13B	ARL13B	1.85078	0.178874
1001	NM_025047>ARL14	ARL14	1.52754	0.411463
1002	NM_152316>ARL14EP	ARL14EP	1.2466	0.216383
1003	NM_001195581>ARL14EPL	ARL14EPL	0.726994	0.678411
1004	NM_019087>ARL15	ARL15	2.86134	0.00470372
1005	NM_001040025>ARL16	ARL16	0.941107	0.696581
1006	NM_016632>ARL17A	ARL17A	0.703088	0.0563695
1007	NM_001039083>ARL17B	ARL17B	0.195423	0.00641371
1008	NM_001667>ARL2	ARL2	0.785177	0.397216
1009	NR_037650>ARL2-SNX15	ARL2-SNX15	0.839985	0.778301
1010	NM_012106>ARL2BP	ARL2BP	0.588293	0.0145653
1011	NM_004311>ARL3	ARL3	0.974383	0.806826
1012	NM_001037164>ARL4A	ARL4A	0.525659	0.0417095
1013	NM_005737>ARL4C	ARL4C	0.58188	1.95829e-05
1014	NM_001661>ARL4D	ARL4D	3.53478	0.00042935
1015	NM_012097>ARL5A	ARL5A	1.44813	0.258378
1016	NM_178815>ARL5B	ARL5B	0.926641	0.795929
1017	NM_001143968>ARL5C	ARL5C	0.850278	0.373901
1018	NM_032146>ARL6	ARL6	2.46386	0.069435
1019	NM_015161>ARL6IP1	ARL6IP1	0.679053	0.0657764
1020	NM_018694>ARL6IP4	ARL6IP4	1.45743	0.145661
1021	NM_006407>ARL6IP5	ARL6IP5	1.01549	0.943969
1022	NM_152522>ARL6IP6	ARL6IP6	0.67242	0.218023
1023	NM_138795>ARL8A	ARL8A	0.817744	0.0558885
1024	NM_018184>ARL8B	ARL8B	1.09331	0.535443
1025	NM_206919>ARL9	ARL9	0.855727	0.471103
1026	NM_018120>ARMC1	ARMC1	0.925576	0.732139
1027	NM_001161012>ARMC10	ARMC10	0.552608	0.170832
1028	NM_145028>ARMC12	ARMC12	0.735485	0.373901
1029	NM_032131>ARMC2	ARMC2	0.892682	0.618892
1030	NM_173081>ARMC3	ARMC3	1.1897	0.284099
1031	NM_018076>ARMC4	ARMC4	1.73747	0.0288438
1032	NM_024742>ARMC5	ARMC5	1.65481	0.00434594
1033	NM_001199196>ARMC6	ARMC6	0.775024	0.275926
1034	NM_024585>ARMC7	ARMC7	0.723412	0.0226102
1035	NM_015396>ARMC8	ARMC8	0.744266	0.147898
1036	NM_025139>ARMC9	ARMC9	1.34953	0.0147788
1037	NM_016608>ARMCX1	ARMCX1	0.348286	0.104593
1038	NM_014782>ARMCX2	ARMCX2	7.67773	0.000751831
1039	NM_016607>ARMCX3	ARMCX3	3.31903	0.00160278
1040	NM_001256155>ARMCX4	ARMCX4	0.563947	0.00321894
1041	NM_022838>ARMCX5	ARMCX5	2.85172	0.0147913
1042	NM_001199818>ARMCX5-GPRASP2	ARMCX5-GPRASP2	1.4528	0.208585
1043	NR_033669>ARMCX6	ARMCX6	1.91258	0.000146597
1044	NM_001099667>ARMS2	ARMS2	0.890137	0.373901
1045	NM_178427>ARNT	ARNT	1.8613	0.105531
1046	NM_014862>ARNT2	ARNT2	0.380607	0.0200719
1047	NM_001178>ARNTL	ARNTL	1.56257	0.0146338
1048	NM_001248005>ARNTL2	ARNTL2	1.35485	0.662127
1049	NM_006409>ARPC1A	ARPC1A	1.25912	0.152006
1050	NM_005720>ARPC1B	ARPC1B	1.93999	0.00404147
1051	NM_005731>ARPC2	ARPC2	1.33923	0.297867
1052	NM_005719>ARPC3	ARPC3	1.19306	0.665911
1053	NM_001198780>ARPC4	ARPC4	0.853219	0.264521
1054	NM_001198793>ARPC4-TTLL3	ARPC4-TTLL3	1.14365	0.725549
1055	NM_005717>ARPC5	ARPC5	0.786318	0.225494
1056	NM_030978>ARPC5L	ARPC5L	0.673355	0.180266
1057	NM_006628>ARPP19	ARPP19	0.584023	0.0177326
1058	NM_001267616>ARPP21	ARPP21	1.2086	0.193157
1059	NM_004312>ARR3	ARR3	1.6292	0.184776
1060	NM_020251>ARRB1	ARRB1	4.48831	0.000920718
1061	NR_047516>ARRB2	ARRB2	0.231044	0.00485258
1062	NM_152285>ARRDC1	ARRDC1	0.571036	0.0253345
1063	NM_015683>ARRDC2	ARRDC2	1.66032	0.243517
1064	NM_020801>ARRDC3	ARRDC3	0.968237	0.922916
1065	NR_027435>ARRDC3-AS1	ARRDC3-AS1	0.885401	0.516719
1066	NM_183376>ARRDC4	ARRDC4	0.458616	0.00487078
1067	NM_001080523>ARRDC5	ARRDC5	0.812336	0.11619
1068	NM_001085425>ARSA	ARSA	5.41465	0.00012811
1069	NM_000046>ARSB	ARSB	1.27369	0.0931704
1070	NM_001669>ARSD	ARSD	1.77934	0.255306
1071	NM_000047>ARSE	ARSE	2.16615	0.0609693
1072	NM_004042>ARSF	ARSF	1.64011	0.247899
1073	NM_001267727>ARSG	ARSG	0.648354	0.351502
1074	NM_001011719>ARSH	ARSH	0.954558	0.711137
1075	NM_001012301>ARSI	ARSI	1.34146	0.39891
1076	NM_024590>ARSJ	ARSJ	1.49182	0.0199869
1077	NM_198150>ARSK	ARSK	0.988517	0.945209
1078	NM_004314>ART1	ART1	1.14541	0.373901
1079	NM_001130017>ART3	ART3	1.0742	0.373901
1080	NM_053017>ART5	ART5	1.12201	0.3738
1081	NM_001136215>ARTN	ARTN	1.80927	0.273725
1082	NM_022786>ARV1	ARV1	1.22999	0.148169
1083	NM_001670>ARVCF	ARVCF	0.402682	0.072603
1084	NM_139058>ARX	ARX	0.381147	0.00221727
1085	NM_020682>AS3MT	AS3MT	0.535285	0.286387
1086	NM_004315>ASAH1	ASAH1	0.473258	0.0153569
1087	NM_001143974>ASAH2	ASAH2	0.754469	0.146168
1088	NM_001079516>ASAH2B	ASAH2B	0.929821	0.636699
1089	NM_018482>ASAP1	ASAP1	1.10488	0.129224
1090	NR_002765>ASAP1-IT1	ASAP1-IT1	1.14316	0.684364
1091	NM_001135191>ASAP2	ASAP2	0.959084	0.691798
1092	NM_017707>ASAP3	ASAP3	0.610258	0.428689
1093	NM_001040445>ASB1	ASB1	0.95071	0.864614
1094	NM_001012428>ASB11	ASB11	0.982756	0.373901
1095	NR_024581>ASB13	ASB13	1.60254	0.127325
1096	NM_130387>ASB14	ASB14	0.785316	0.664355
1097	NM_080863>ASB16	ASB16	0.815223	0.200844
1098	NR_049729>ASB16-AS1	ASB16-AS1	0.934173	0.676177
1099	NM_212556>ASB18	ASB18	1.0688	0.373901
1100	NM_001202429>ASB2	ASB2	0.954225	0.16836
1101	NM_001201965>ASB3	ASB3	0.393879	0.0616968
1102	NM_016116>ASB4	ASB4	0.937279	0.534647
1103	NM_080874>ASB5	ASB5	1.2608	0.243134
1104	NM_001202403>ASB6	ASB6	0.423541	0.0320222
1105	NM_198243>ASB7	ASB7	0.801171	0.0905882
1106	NM_024095>ASB8	ASB8	0.899893	0.0208883
1107	NM_001168530>ASB9	ASB9	0.434458	0.131697
1108	NR_033769>ASB9P1	ASB9P1	0.979282	0.894644
1109	NM_001198800>ASCC1	ASCC1	0.685412	0.23738
1110	NM_032204>ASCC2	ASCC2	1.2187	0.223182
1111	NM_006828>ASCC3	ASCC3	0.778723	0.075452
1112	NM_004316>ASCL1	ASCL1	0.734502	0.48667
1113	NM_020646>ASCL3	ASCL3	0.701401	0.133953
1114	NM_203436>ASCL4	ASCL4	1.10864	0.435336
1115	NM_001270601>ASCL5	ASCL5	0.994641	0.958409
1116	NM_014034>ASF1A	ASF1A	0.597906	0.03886
1117	NM_018154>ASF1B	ASF1B	0.640011	0.118201
1118	NM_001671>ASGR1	ASGR1	3.82448	0.110367
1119	NM_001201352>ASGR2	ASGR2	1.00002	0.373901
1120	NM_018489>ASH1L	ASH1L	1.0531	0.837141
1121	NR_027023>ASH1L-AS1	ASH1L-AS1	0.856123	0.20782
1122	NM_001105214>ASH2L	ASH2L	0.463876	0.0366582
1123	NR_046389>ASIC1	ASIC1	1.84211	0.0523822
1124	NM_001094>ASIC2	ASIC2	1.21043	0.0101716
1125	NM_020321>ASIC3	ASIC3	1.67322	0.000310515
1126	NM_182847>ASIC4	ASIC4	1.15465	0.14482
1127	NM_017419>ASIC5	ASIC5	1.29425	0.187842
1128	NM_001672>ASIP	ASIP	1.96338	0.140946
1129	NM_001024943>ASL	ASL	1.37085	0.183275
1130	NM_001171039>ASMT	ASMT	1.10838	0.373901
1131	NM_001173474>ASMTL	ASMTL	2.27045	0.109474
1132	NR_026710>ASMTL-AS1	ASMTL-AS1	1.7127	0.267498
1133	NM_004317>ASNA1	ASNA1	0.807451	0.0217143
1134	NM_133436>ASNS	ASNS	0.493267	0.0992535
1135	NM_019048>ASNSD1	ASNSD1	1.06542	0.812486
1136	NM_001114598>ASPDH	ASPDH	1.0904	0.373921
1137	NM_001164754>ASPH	ASPH	4.10041	0.00181361
1138	NM_181718>ASPHD1	ASPHD1	3.85829	0.00898119
1139	NM_020437>ASPHD2	ASPHD2	1.31241	0.182799
1140	NM_018136>ASPM	ASPM	0.567287	0.10623
1141	NM_017680>ASPN	ASPN	0.997611	0.424677
1142	NM_152792>ASPRV1	ASPRV1	1.08849	0.805801
1143	NM_024083>ASPSCR1	ASPSCR1	0.607109	0.236822
1144	NM_025080>ASRGL1	ASRGL1	0.181039	0.00641348
1145	NM_054012>ASS1	ASS1	1.60469	0.246775
1146	NM_014065>ASTE1	ASTE1	0.942207	0.446151
1147	NM_004319>ASTN1	ASTN1	1.21596	0.175567
1148	NM_198186>ASTN2	ASTN2	0.651816	0.186417
1149	NM_018164>ASUN	ASUN	1.0428	0.661371
1150	NM_015338>ASXL1	ASXL1	0.756958	0.0651136
1151	NM_018263>ASXL2	ASXL2	0.991786	0.982421
1152	NR_023315>ASZ1	ASZ1	0.938795	0.373901
1153	NM_032810>ATAD1	ATAD1	0.781429	0.0602042
1154	NM_014109>ATAD2	ATAD2	0.545141	0.0116555
1155	NM_001242338>ATAD2B	ATAD2B	0.846958	0.0332028
1156	NM_018188>ATAD3A	ATAD3A	1.63264	0.0844493
1157	NM_031921>ATAD3B	ATAD3B	1.14069	0.748193
1158	NM_001039211>ATAD3C	ATAD3C	1.59547	0.272557
1159	NM_024857>ATAD5	ATAD5	0.693811	0.127538
1160	NM_001031722.5>ATAT1	ATAT1	0.878294	0.524847
1161	NM_033064>ATCAY	ATCAY	0.940152	0.596802
1162	NM_001001976>ATE1	ATE1	0.54881	0.374283
1163	NM_005171>ATF1	ATF1	0.90151	0.329291
1164	NM_001256093>ATF2	ATF2	2.89376	0.0640532
1165	NM_001030287>ATF3	ATF3	0.653053	0.256641
1166	NM_001675>ATF4	ATF4	1.5053	0.0338734
1167	NM_012068>ATF5	ATF5	0.670464	0.0488411
1168	NM_007348>ATF6	ATF6	1.19238	0.0128924
1169	NM_001136153>ATF6B	ATF6B	0.819738	0.6347
1170	NM_001130060>ATF7	ATF7	1.29636	0.210389
1171	NM_018179>ATF7IP	ATF7IP	0.798417	0.406737
1172	NR_045816>ATF7IP2	ATF7IP2	1.03473	0.373901
1173	NM_031482>ATG10	ATG10	0.653199	0.133708
1174	NR_033363>ATG12	ATG12	1.61176	0.190805
1175	NM_001142673>ATG13	ATG13	2.51398	0.0583261
1176	NM_014924>ATG14	ATG14	1.26768	0.0401929
1177	NM_001190267>ATG16L1	ATG16L1	1.82996	0.192062
1178	NM_033388>ATG16L2	ATG16L2	2.15103	0.110841
1179	NM_015104>ATG2A	ATG2A	0.889954	0.707153
1180	NM_018036>ATG2B	ATG2B	0.959288	0.854329
1181	NM_022488>ATG3	ATG3	0.740387	0.103541
1182	NM_178270>ATG4A	ATG4A	1.79421	0.442221
1183	NM_013325>ATG4B	ATG4B	0.738167	0.344367
1184	NM_178221>ATG4C	ATG4C	1.47515	0.279075
1185	NM_032885>ATG4D	ATG4D	0.729051	0.124185
1186	NM_004849>ATG5	ATG5	0.891129	0.462513
1187	NM_001136031>ATG7	ATG7	1.7143	0.279339
1188	NM_001077198>ATG9A	ATG9A	0.532975	0.0562536
1189	NR_073169>ATG9B	ATG9B	1.27149	0.199951
1190	NM_025092>ATHL1	ATHL1	3.74124	0.0153335
1191	NM_004044>ATIC	ATIC	1.01185	0.946191
1192	NM_015915>ATL1	ATL1	1.69523	0.00992437
1193	NM_022374>ATL2	ATL2	1.18084	0.000985865
1194	NM_015459>ATL3	ATL3	1.39291	0.13429
1195	NM_000051>ATM	ATM	1.09602	0.681124
1196	NM_015251>ATMIN	ATMIN	0.794093	0.0244892
1197	NM_001007026>ATN1	ATN1	1.29078	0.293384
1198	NM_005172>ATOH1	ATOH1	0.849011	0.373901
1199	NM_145178>ATOH7	ATOH7	1.16488	0.48963
1200	NM_032827>ATOH8	ATOH8	8.47822	0.00017475
1201	NM_004045>ATOX1	ATOX1	1.51105	0.110342
1202	NM_024490>ATP10A	ATP10A	1.02339	0.664114
1203	NM_025153>ATP10B	ATP10B	1.20713	0.128453
1204	NM_020453>ATP10D	ATP10D	2.46833	0.0038362
1205	NM_032189>ATP11A	ATP11A	1.22138	0.554165
1206	NM_014616>ATP11B	ATP11B	1.07059	0.335301
1207	NM_173694>ATP11C	ATP11C	0.941616	0.773982
1208	NM_001185085>ATP12A	ATP12A	0.97676	0.362576
1209	NM_020410>ATP13A1	ATP13A1	1.11074	0.47212
1210	NM_001141974>ATP13A2	ATP13A2	1.48484	0.104572
1211	NM_024524>ATP13A3	ATP13A3	1.36009	0.152056
1212	NM_032279>ATP13A4	ATP13A4	1.00722	0.911041
1213	NM_198505>ATP13A5	ATP13A5	0.952272	0.736341
1214	NM_001160233>ATP1A1	ATP1A1	1.06681	0.800784
1215	NR_024124>ATP1A1OS	ATP1A1OS	1.79216	0.109475
1216	NM_000702>ATP1A2	ATP1A2	0.992206	0.953896
1217	NM_001256213>ATP1A3	ATP1A3	1.31707	0.194173
1218	NM_144699>ATP1A4	ATP1A4	1.01723	0.907893
1219	NM_001677>ATP1B1	ATP1B1	1.08899	0.698243
1220	NM_001678>ATP1B2	ATP1B2	1.36973	0.341938
1221	NM_001679>ATP1B3	ATP1B3	1.01753	0.916653
1222	NM_001142447>ATP1B4	ATP1B4	0.980814	0.373901
1223	NM_173201>ATP2A1	ATP2A1	1.64139	0.204571
1224	NM_170665>ATP2A2	ATP2A2	1.05002	0.72397
1225	NM_174957>ATP2A3	ATP2A3	0.872821	0.671091
1226	NM_001001323>ATP2B1	ATP2B1	5.88268	0.00320369
1227	NM_001001331>ATP2B2	ATP2B2	1.03347	0.308425
1228	NM_001001396>ATP2B4	ATP2B4	1.54861	0.108495
1229	NM_001199179>ATP2C1	ATP2C1	1.1543	0.153976
1230	NM_014861>ATP2C2	ATP2C2	1.19969	0.370177
1231	NM_000704>ATP4A	ATP4A	0.94873	0.373901
1232	NM_000705>ATP4B	ATP4B	0.953067	0.724717
1233	NM_001001937>ATP5A1	ATP5A1	0.658541	0.015423
1234	NM_001686>ATP5B	ATP5B	0.653425	0.00136399
1235	NM_001001973>ATP5C1	ATP5C1	0.571574	0.233607
1236	NM_001001975>ATP5D	ATP5D	0.124766	0.0435582
1237	NM_006886>ATP5E	ATP5E	1.07024	0.817113
1238	NR_002162>ATP5EP2	ATP5EP2	0.816426	0.274726
1239	NM_001688>ATP5F1	ATP5F1	0.851966	0.258329
1240	NM_001002027>ATP5G1	ATP5G1	0.827457	0.371973
1241	NM_001002031>ATP5G2	ATP5G2	1.97271	0.144573
1242	NM_001689>ATP5G3	ATP5G3	0.637176	0.0495647
1243	NM_006356>ATP5H	ATP5H	0.738958	0.202806
1244	NM_007100>ATP5I	ATP5I	0.639727	0.527916
1245	NM_001685>ATP5J	ATP5J	0.111479	0.137822
1246	NM_001003714>ATP5J2	ATP5J2	0.0721617	0.132956
1247	NM_001198879>ATP5J2-PTCD1	ATP5J2-PTCD1	1.29908	0.452361
1248	NM_006476>ATP5L	ATP5L	0.846726	0.212691
1249	NM_001165877>ATP5L2	ATP5L2	0.575659	0.266086
1250	NM_001697>ATP5O	ATP5O	0.788748	0.11759
1251	NM_015684>ATP5S	ATP5S	0.524888	0.212594
1252	NM_001167871>ATP5SL	ATP5SL	0.531489	0.211351
1253	NM_001183>ATP6AP1	ATP6AP1	1.32673	0.066412
1254	NM_001017971>ATP6AP1L	ATP6AP1L	0.676918	0.5068
1255	NM_005765>ATP6AP2	ATP6AP2	1.49766	0.181331
1256	NM_001130020>ATP6V0A1	ATP6V0A1	0.479471	0.015531
1257	NM_012463>ATP6V0A2	ATP6V0A2	0.858059	0.360322
1258	NM_130840>ATP6V0A4	ATP6V0A4	1.24772	0.00529146
1259	NM_001039457>ATP6V0B	ATP6V0B	3.01691	0.145678
1260	NM_001694>ATP6V0C	ATP6V0C	0.752613	0.4544
1261	NR_037141>ATP6V0CP3	ATP6V0CP3	0.700611	0.373901
1262	NM_004691>ATP6V0D1	ATP6V0D1	0.905367	0.200892
1263	NM_152565>ATP6V0D2	ATP6V0D2	1.45683	0.00802008
1264	NM_003945>ATP6V0E1	ATP6V0E1	1.87327	0.0288027
1265	NM_145230>ATP6V0E2	ATP6V0E2	0.248058	0.000828739
1266	NR_027040>ATP6V0E2-AS1	ATP6V0E2-AS1	0.349994	0.0144471
1267	NM_001690>ATP6V1A	ATP6V1A	0.980887	0.831952
1268	NM_001692>ATP6V1B1	ATP6V1B1	1.33509	0.0118029
1269	NM_001693>ATP6V1B2	ATP6V1B2	0.866791	0.0522209
1270	NM_001695>ATP6V1C1	ATP6V1C1	1.10218	0.276234
1271	NM_144583>ATP6V1C2	ATP6V1C2	1.699	0.010388
1272	NM_015994>ATP6V1D	ATP6V1D	1.23087	0.246938
1273	NM_001039367>ATP6V1E1	ATP6V1E1	1.33656	0.300806
1274	NM_080653>ATP6V1E2	ATP6V1E2	1.25116	0.0952637
1275	NM_004231>ATP6V1F	ATP6V1F	1.37415	0.0842016
1276	NM_004888>ATP6V1G1	ATP6V1G1	0.787679	0.187403
1277	NM_001204078>ATP6V1G2	ATP6V1G2	0.847983	0.0576767
1278	NR_037853.7>ATP6V1G2-DDX39B	ATP6V1G2-DDX39B	0.772114	0.168351
1279	NM_133262>ATP6V1G3	ATP6V1G3	2.03307	1.43346e-05
1280	NM_213620>ATP6V1H	ATP6V1H	0.436316	0.00755197
1281	NM_000052>ATP7A	ATP7A	1.84097	0.0682681
1282	NM_001243182>ATP7B	ATP7B	1.52328	0.308832
1283	NM_006095>ATP8A1	ATP8A1	1.00939	0.755578
1284	NM_016529>ATP8A2	ATP8A2	0.881387	0.409383
1285	NM_005603>ATP8B1	ATP8B1	1.56641	0.372585
1286	NM_020452>ATP8B2	ATP8B2	2.08308	0.0233306
1287	NR_047593>ATP8B3	ATP8B3	0.706075	0.253158
1288	NM_024837>ATP8B4	ATP8B4	1.38663	0.227813
1289	NR_003582>ATP8B5P	ATP8B5P	0.507233	0.0350754
1290	NM_006045>ATP9A	ATP9A	0.785596	0.295703
1291	NM_198531>ATP9B	ATP9B	1.12627	0.467699
1292	NM_001042546>ATPAF1	ATPAF1	0.448884	0.151689
1293	NM_145691>ATPAF2	ATPAF2	0.946403	0.715676
1294	NM_001141972>ATPBD4	ATPBD4	0.659918	0.287816
1295	NR_038251>ATPBD4-AS1	ATPBD4-AS1	0.431241	0.0668638
1296	NM_016311>ATPIF1	ATPIF1	0.844515	0.32963
1297	NM_001184>ATR	ATR	1.18464	0.147608
1298	NM_016085>ATRAID	ATRAID	1.69591	0.045595
1299	NM_130384>ATRIP	ATRIP	0.619036	0.388597
1300	NM_139321>ATRN	ATRN	1.43763	0.0213748
1301	NM_207303>ATRNL1	ATRNL1	0.388205	0.0108221
1302	NM_000489>ATRX	ATRX	1.43471	0.161384
1303	NM_000332>ATXN1	ATXN1	1.71708	0.254156
1304	NM_013236>ATXN10	ATXN10	0.825468	0.0396704
1305	NM_001137675>ATXN1L	ATXN1L	0.794252	0.11111
1306	NM_002973>ATXN2	ATXN2	0.923086	0.640323
1307	NM_148414>ATXN2L	ATXN2L	0.533701	0.0141934
1308	NR_028461>ATXN3	ATXN3	0.469148	0.117812
1309	NM_001135995>ATXN3L	ATXN3L	1.33229	0.255069
1310	NM_001128149>ATXN7	ATXN7	0.91916	0.718096
1311	NM_020725>ATXN7L1	ATXN7L1	1.4484	0.189299
1312	NM_153340>ATXN7L2	ATXN7L2	0.863431	0.300571
1313	NM_001098833>ATXN7L3	ATXN7L3	0.82035	0.505034
1314	NM_001136262>ATXN7L3B	ATXN7L3B	0.828862	0.0191823
1315	NR_002717>ATXN8OS	ATXN8OS	1.00824	0.963599
1316	NM_001698>AUH	AUH	0.887732	0.654955
1317	NM_024037>AUNIP	AUNIP	0.692667	0.234621
1318	NM_181575>AUP1	AUP1	1.17661	0.450262
1319	NM_003600>AURKA	AURKA	0.611965	0.24921
1320	NM_001127229>AURKAIP1	AURKAIP1	0.648175	0.32775
1321	NR_001587>AURKAPS1	AURKAPS1	0.789309	0.397623
1322	NM_004217>AURKB	AURKB	0.37796	0.116262
1323	NM_003160>AURKC	AURKC	0.918124	0.852815
1324	NM_015570>AUTS2	AUTS2	0.710994	0.163669
1325	NM_020371>AVEN	AVEN	0.83232	0.546018
1326	NM_006576>AVIL	AVIL	1.01029	0.95197
1327	NM_015060>AVL9	AVL9	1.08362	0.731429
1328	NM_021732>AVPI1	AVPI1	0.917193	0.548578
1329	NM_000706>AVPR1A	AVPR1A	1.02732	0.373901
1330	NM_000707>AVPR1B	AVPR1B	1.12417	0.373901
1331	NM_000054>AVPR2	AVPR2	0.60648	0.183959
1332	NM_001002254>AWAT2	AWAT2	1.08899	0.373901
1333	NR_073544>AXDND1	AXDND1	1.29392	0.318904
1334	NM_181050>AXIN1	AXIN1	0.659523	0.23313
1335	NM_004655>AXIN2	AXIN2	2.06956	0.0958116
1336	NM_021913>AXL	AXL	0.745308	0.371457
1337	NM_001185>AZGP1	AZGP1	0.669712	0.275222
1338	NR_036679>AZGP1P1	AZGP1P1	1.0947	0.65234
1339	NM_014984>AZI1	AZI1	0.657314	0.235285
1340	NM_001134432>AZI2	AZI2	1.2773	0.61715
1341	NM_015878>AZIN1	AZIN1	1.33542	0.0737143
1342	NM_001700>AZU1	AZU1	1.18849	0.373901
1343	NM_004048>B2M	B2M	1.4036	0.244611
1344	NM_033169>B3GALNT1	B3GALNT1	1.34251	0.337922
1345	NM_152490>B3GALNT2	B3GALNT2	0.570978	0.000402429
1346	NM_020981>B3GALT1	B3GALT1	1.03466	0.892621
1347	NM_003783>B3GALT2	B3GALT2	1.30783	0.134115
1348	NM_003782.3>B3GALT4	B3GALT4	1.07845	0.635652
1349	NM_033170>B3GALT5	B3GALT5	3.76768	5.02584e-05
1350	NM_080605>B3GALT6	B3GALT6	1.16464	0.601988
1351	NM_194318>B3GALTL	B3GALTL	0.737641	0.0573674
1352	NM_018644>B3GAT1	B3GAT1	0.917072	0.373901
1353	NM_080742>B3GAT2	B3GAT2	1	?
1354	NM_012200>B3GAT3	B3GAT3	1.25555	0.0704982
1355	NM_006876>B3GNT1	B3GNT1	0.771296	0.43375
1356	NM_006577>B3GNT2	B3GNT2	1.17959	0.352239
1357	NM_014256>B3GNT3	B3GNT3	0.955418	0.742905
1358	NM_030765>B3GNT4	B3GNT4	1.17343	0.474622
1359	NM_032047>B3GNT5	B3GNT5	1.11089	0.393646
1360	NM_138706>B3GNT6	B3GNT6	1.08133	0.373901
1361	NM_145236>B3GNT7	B3GNT7	1.0868	0.789584
1362	NM_198540>B3GNT8	B3GNT8	1.05955	0.685021
1363	NM_033309>B3GNT9	B3GNT9	1.86365	0.0306176
1364	NM_001009905>B3GNTL1	B3GNTL1	1.03283	0.601429
1365	NM_001478>B4GALNT1	B4GALNT1	0.843336	0.476761
1366	NM_001159388>B4GALNT2	B4GALNT2	1.02285	0.373901
1367	NM_173593>B4GALNT3	B4GALNT3	1.6282	0.2688
1368	NM_178537>B4GALNT4	B4GALNT4	1.40434	0.163234
1369	NM_001497>B4GALT1	B4GALT1	0.732442	0.333319
1370	NM_030587>B4GALT2	B4GALT2	1.22662	0.46441
1371	NM_001199873>B4GALT3	B4GALT3	1.27445	0.234678
1372	NM_212543>B4GALT4	B4GALT4	3.29443	0.00532592
1373	NM_004776>B4GALT5	B4GALT5	1.36425	0.326198
1374	NM_004775>B4GALT6	B4GALT6	1.93127	0.0299359
1375	NM_007255>B4GALT7	B4GALT7	1.5059	0.046342
1376	NM_015681>B9D1	B9D1	0.952426	0.878046
1377	NM_030578>B9D2	B9D2	0.943446	0.856133
1378	NM_024812>BAALC	BAALC	5.78227	0.0180792
1379	NM_001127610>BAAT	BAAT	1.14675	0.330742
1380	NM_014173>BABAM1	BABAM1	0.722728	0.059777
1381	NM_001207049>BACE1	BACE1	1.6101	0.450531
1382	NR_037803>BACE1-AS	BACE1-AS	1.02964	0.822847
1383	NM_138991>BACE2	BACE2	7.52687	0.00121056
1384	NM_001186>BACH1	BACH1	1.89697	0.00447834
1385	NM_021813>BACH2	BACH2	1.37961	0.233103
1386	NM_032989>BAD	BAD	0.730691	0.0554582
1387	NM_001172415>BAG1	BAG1	0.370515	0.0298705
1388	NM_004282>BAG2	BAG2	0.858665	0.492963
1389	NM_004281>BAG3	BAG3	0.933076	0.441067
1390	NM_001204878>BAG4	BAG4	1.15073	0.805973
1391	NM_004873>BAG5	BAG5	0.55904	0.0630368
1392	NM_080702>BAG6	BAG6	0.639289	0.118185
1393	NM_182482>BAGE2	BAGE2	1.00151	0.373901
1394	NM_182481>BAGE3	BAGE3	1.00151	0.373901
1395	NM_181704>BAGE4	BAGE4	1.058	0.373901
1396	NM_182484>BAGE5	BAGE5	1.05958	0.373901
1397	NM_001080519>BAHCC1	BAHCC1	5.0954	0.0174937
1398	NM_014952>BAHD1	BAHD1	0.647946	0.0205732
1399	NM_001702>BAI1	BAI1	1.01833	0.373901
1400	NM_001703>BAI2	BAI2	2.7625	0.0490056
1401	NM_001704>BAI3	BAI3	1.05623	0.162031
1402	NM_006340>BAIAP2	BAIAP2	2.55381	0.0752665
1403	NR_026857>BAIAP2-AS1	BAIAP2-AS1	0.99919	0.998043
1404	NM_018842>BAIAP2L1	BAIAP2L1	1.13815	0.64064
1405	NM_025045>BAIAP2L2	BAIAP2L2	1.30736	0.261234
1406	NM_001199096>BAIAP3	BAIAP3	1.05268	0.207283
1407	NM_001188>BAK1	BAK1	0.796112	0.234232
1408	NM_012342>BAMBI	BAMBI	1.0419	0.833309
1409	NR_047671>BANCR	BANCR	1.0344	0.922789
1410	NM_001143985>BANF1	BANF1	0.562328	0.0767181
1411	NM_017935>BANK1	BANK1	0.999965	0.912155
1412	NM_001173543>BANP	BANP	2.32949	0.128953
1413	NM_004656>BAP1	BAP1	0.773469	0.0440816
1414	NM_000465>BARD1	BARD1	0.706778	0.245757
1415	NM_020064>BARHL1	BARHL1	1.18656	0.359758
1416	NM_003658>BARX2	BARX2	1.1867	0.16785
1417	NM_006317>BASP1	BASP1	0.327386	0.186308
1418	NR_033774>BASP1P1	BASP1P1	0.790565	0.373901
1419	NM_006399>BATF	BATF	0.992613	0.960168
1420	NM_138456>BATF2	BATF2	3.12553	0.00552144
1421	NM_018664>BATF3	BATF3	1.59958	0.205555
1422	NR_027882>BAX	BAX	2.22911	0.265127
1423	NM_013448>BAZ1A	BAZ1A	0.708948	0.260964
1424	NM_032408>BAZ1B	BAZ1B	0.689908	0.00187455
1425	NM_013449>BAZ2A	BAZ2A	1.06088	0.85233
1426	NM_013450>BAZ2B	BAZ2B	1.09751	0.741415
1427	NM_001127241>BBC3	BBC3	1.43565	0.298176
1428	NM_001195305>BBIP1	BBIP1	0.742193	0.184153
1429	NM_003986>BBOX1	BBOX1	1.66275	0.360904
1430	NM_024649>BBS1	BBS1	0.947515	0.878871
1431	NM_024685>BBS10	BBS10	1.05218	0.702145
1432	NM_001178007>BBS12	BBS12	1.08723	0.574858
1433	NM_031885>BBS2	BBS2	0.747519	0.509875
1434	NR_045565>BBS4	BBS4	1.79592	0.240667
1435	NM_152384>BBS5	BBS5	0.91624	0.576355
1436	NM_018190>BBS7	BBS7	1.20981	0.46504
1437	NM_001033605>BBS9	BBS9	1.99277	0.179983
1438	NM_020235>BBX	BBX	0.900507	0.495628
1439	NM_001013257>BCAM	BCAM	0.739386	0.51183
1440	NM_198427>BCAN	BCAN	0.304942	0.133301
1441	NR_027830>BCAP29	BCAP29	1.41812	0.358768
1442	NM_001256447>BCAP31	BCAP31	0.542166	0.216299
1443	NM_001170721>BCAR1	BCAR1	1.37525	0.240446
1444	NM_001261409>BCAR3	BCAR3	2.56563	0.0298055
1445	NR_024049>BCAR4	BCAR4	1.1622	0.373901
1446	NM_003657>BCAS1	BCAS1	1.26974	0.033095
1447	NM_005872>BCAS2	BCAS2	0.828947	0.53687
1448	NM_001099432>BCAS3	BCAS3	1.99075	0.198439
1449	NM_198799>BCAS4	BCAS4	1.72127	0.0409502
1450	NM_001178094>BCAT1	BCAT1	0.643931	0.0623905
1451	NR_028450>BCAT2	BCAT2	2.10421	0.308477
1452	NM_078469>BCCIP	BCCIP	0.703164	0.0576149
1453	NM_181708>BCDIN3D	BCDIN3D	1.20997	0.0873494
1454	NR_027499>BCDIN3D-AS1	BCDIN3D-AS1	1.72427	0.249917
1455	NM_000055>BCHE	BCHE	1.4756	0.280067
1456	NM_000709>BCKDHA	BCKDHA	0.789838	0.190053
1457	NM_183050>BCKDHB	BCKDHB	0.764339	0.25705
1458	NM_001122957>BCKDK	BCKDK	0.672125	0.00816868
1459	NM_003921>BCL10	BCL10	1.03987	0.707177
1460	NM_022893>BCL11A	BCL11A	0.981759	0.373901
1461	NM_138576>BCL11B	BCL11B	1.00036	0.959795
1462	NM_000633>BCL2	BCL2	0.69043	0.40695
1463	NM_004049>BCL2A1	BCL2A1	3.90765	0.0179536
1464	NM_138578>BCL2L1	BCL2L1	0.831141	0.286643
1465	NM_020396>BCL2L10	BCL2L10	1.49986	0.458778
1466	NM_001204110>BCL2L11	BCL2L11	2.16369	0.0481245
1467	NM_001040668>BCL2L12	BCL2L12	0.660771	0.260815
1468	NM_001270732>BCL2L13	BCL2L13	0.440177	0.0261754
1469	NM_030766>BCL2L14	BCL2L14	1.00478	0.247307
1470	NM_001010922>BCL2L15	BCL2L15	1.14469	0.362582
1471	NM_004050>BCL2L2	BCL2L2	0.789679	0.105892
1472	NM_001199864>BCL2L2-PABPN1	BCL2L2-PABPN1	1.13899	0.710623
1473	NM_005178>BCL3	BCL3	1.47032	0.642348
1474	NM_001130845>BCL6	BCL6	2.80686	0.180912
1475	NM_181844>BCL6B	BCL6B	1.14552	0.238451
1476	NM_020993>BCL7A	BCL7A	1.65536	0.486688
1477	NM_001707>BCL7B	BCL7B	0.73124	0.331293
1478	NM_004765>BCL7C	BCL7C	0.686607	0.235126
1479	NM_004326>BCL9	BCL9	0.972095	0.851889
1480	NM_182557>BCL9L	BCL9L	1.22813	0.466403
1481	NM_001077440>BCLAF1	BCLAF1	0.562434	0.0258887
1482	NM_017429>BCMO1	BCMO1	1.04475	0.811392
1483	NM_001256398>BCO2	BCO2	2.22079	0.165597
1484	NM_001123384>BCOR	BCOR	0.543857	0.0270623
1485	NM_021946>BCORL1	BCORL1	1.05123	0.823888
1486	NM_004327>BCR	BCR	1.24854	0.244914
1487	NR_037566>BCRP2	BCRP2	1.20106	0.220397
1488	NR_024494>BCRP3	BCRP3	1.1769	0.819527
1489	NM_001257344>BCS1L	BCS1L	0.563354	0.407967
1490	NR_001568>BCYRN1	BCYRN1	1.66835	0.596767
1491	NM_203314>BDH1	BDH1	0.62771	0.0446795
1492	NM_020139>BDH2	BDH2	1.9766	0.112334
1493	NM_000710>BDKRB1	BDKRB1	67.9623	5.03803e-06
1494	NM_000623>BDKRB2	BDKRB2	75.4981	0.000769616
1495	NM_170733>BDNF	BDNF	6.35721	0.00500559
1496	NR_033312>BDNF-AS	BDNF-AS	2.48155	0.0487907
1497	NM_018429>BDP1	BDP1	0.884298	0.122498
1498	NM_001136106>BEAN1	BEAN1	0.7455	0.63366
1499	NM_003766>BECN1	BECN1	1.07177	0.590662
1500	NM_020836>BEGAIN	BEGAIN	0.0388965	0.00127562
1501	NM_153346>BEND2	BEND2	1.0218	0.373901
1502	NM_001080450>BEND3	BEND3	0.789774	0.563362
1503	NM_001159547>BEND4	BEND4	1.03306	0.228982
1504	NM_024603>BEND5	BEND5	1.50639	0.17066
1505	NM_152731>BEND6	BEND6	0.776978	0.17511
1506	NM_152751>BEND7	BEND7	0.923283	0.766202
1507	NM_001139443>BEST1	BEST1	1.3875	0.115372
1508	NM_017682>BEST2	BEST2	0.895617	0.547387
1509	NM_032735>BEST3	BEST3	0.909343	0.374011
1510	NM_153274>BEST4	BEST4	1.57156	0.200464
1511	NM_005868>BET1	BET1	1.54576	0.13627
1512	NM_016526>BET1L	BET1L	1.81601	0.111319
1513	NM_001139444>BET3L	BET3L	1.0176	0.931748
1514	NM_018476>BEX1	BEX1	0.407235	0.00495736
1515	NM_001168400>BEX2	BEX2	0.670557	0.169044
1516	NM_001080425>BEX4	BEX4	2.24649	0.379163
1517	NM_016561>BFAR	BFAR	0.973912	0.72386
1518	NM_001161705>BFSP1	BFSP1	1.47712	0.384603
1519	NM_003571>BFSP2	BFSP2	1.13411	0.373901
1520	NM_199173>BGLAP	BGLAP	0.321272	0.0742223
1521	NM_001711>BGN	BGN	42.2935	0.000591952
1522	NM_177455>BHLHA15	BHLHA15	0.877851	0.373901
1523	NM_001142528>BHLHB9	BHLHB9	1.4669	0.309651
1524	NM_152414>BHLHE22	BHLHE22	1.12901	0.373901
1525	NM_080606>BHLHE23	BHLHE23	1.08938	0.373901
1526	NM_003670>BHLHE40	BHLHE40	1.15842	0.541227
1527	NR_037903>BHLHE40-AS1	BHLHE40-AS1	0.27422	0.0279807
1528	NM_030762>BHLHE41	BHLHE41	2.4906	0.191023
1529	NM_001713>BHMT	BHMT	1.13421	0.170677
1530	NM_001178005>BHMT2	BHMT2	1.07594	0.373901
1531	NM_001080512>BICC1	BICC1	1.5532	0.259293
1532	NM_001714>BICD1	BICD1	0.612391	0.104525
1533	NM_015250>BICD2	BICD2	0.8557	0.551266
1534	NM_001244567>BID	BID	1.46594	0.0625688
1535	NM_001197>BIK	BIK	0.616675	0.0670625
1536	NM_139348>BIN1	BIN1	1.37061	0.0503506
1537	NM_016293>BIN2	BIN2	0.827703	0.373901
1538	NM_018688>BIN3	BIN3	1.15697	0.117573
1539	NM_001256163>BIRC2	BIRC2	3.24033	0.0176464
1540	NM_182962>BIRC3	BIRC3	1.70625	0.27366
1541	NM_001012270>BIRC5	BIRC5	0.39821	0.366167
1542	NM_016252>BIRC6	BIRC6	1.1239	0.581044
1543	NM_139317>BIRC7	BIRC7	1.0589	0.42574
1544	NM_017693>BIVM	BIVM	0.783807	0.597446
1545	NM_001204425>BIVM-ERCC5	BIVM-ERCC5	0.932124	0.439492
1546	NM_001167820>BLCAP	BLCAP	3.60812	0.15272
1547	NM_001001786>BLID	BLID	2.2306	0.0216522
1548	NM_001715>BLK	BLK	1.25062	0.373901
1549	NM_000057>BLM	BLM	0.523451	0.0584341
1550	NM_000386>BLMH	BLMH	0.801572	0.169279
1551	NM_001258442>BLNK	BLNK	1.14704	0.373901
1552	NM_001487>BLOC1S1	BLOC1S1	0.865007	0.0945451
1553	NR_037658>BLOC1S1-RDH5	BLOC1S1-RDH5	0.542003	0.00504153
1554	NM_173809>BLOC1S2	BLOC1S2	0.73522	0.270818
1555	NM_212550>BLOC1S3	BLOC1S3	0.977775	0.836833
1556	NM_018366>BLOC1S4	BLOC1S4	1.0576	0.238462
1557	NM_201280>BLOC1S5	BLOC1S5	0.911803	0.355322
1558	NR_037616>BLOC1S5-TXNDC5	BLOC1S5-TXNDC5	1.46038	0.00291667
1559	NM_012388>BLOC1S6	BLOC1S6	0.785371	0.108692
1560	NM_000712>BLVRA	BLVRA	0.827675	0.00763753
1561	NM_000713>BLVRB	BLVRB	1.17039	0.54303
1562	NM_003666>BLZF1	BLZF1	1.08494	0.370496
1563	NM_001003943>BMF	BMF	3.13415	0.0854549
1564	NM_005180>BMI1	BMI1	1.20145	0.589882
1565	NM_006129>BMP1	BMP1	2.66847	0.00235141
1566	NM_014482>BMP10	BMP10	1.36604	0.149497
1567	NM_005448>BMP15	BMP15	1.31416	0.116386
1568	NM_001200>BMP2	BMP2	62.377	1.47274e-05
1569	NM_017593>BMP2K	BMP2K	0.787931	0.457205
1570	NM_001201>BMP3	BMP3	0.886083	0.613886
1571	NM_130851>BMP4	BMP4	14.5441	0.00401198
1572	NM_021073>BMP5	BMP5	1.82788	0.125919
1573	NM_001718>BMP6	BMP6	1.83075	0.0377927
1574	NM_001719>BMP7	BMP7	3.69982	0.0006789
1575	NM_181809>BMP8A	BMP8A	1.41609	0.0572826
1576	NM_001720>BMP8B	BMP8B	1.12406	0.552471
1577	NM_133468>BMPER	BMPER	7.56887	0.00926228
1578	NM_004329>BMPR1A	BMPR1A	1.17833	0.337106
1579	NM_001203>BMPR1B	BMPR1B	0.529564	0.134714
1580	NM_001204>BMPR2	BMPR2	1.16374	0.0132282
1581	NM_014753>BMS1	BMS1	0.979424	0.862613
1582	NR_026566.1>BMS1P1	BMS1P1	2.0286	0.104737
1583	NR_072978.1>BMS1P2	BMS1P2	1.33134	0.262858
1584	NR_026592>BMS1P4	BMS1P4	1.77087	0.0164307
1585	NR_003611.1>BMS1P5	BMS1P5	2.0286	0.104737
1586	NR_024495.1>BMS1P6	BMS1P6	1.33134	0.262858
1587	NM_203281>BMX	BMX	1.00923	0.373901
1588	NM_001717>BNC1	BNC1	1.26851	0.180656
1589	NM_017637>BNC2	BNC2	1.12566	0.161332
1590	NM_013979>BNIP1	BNIP1	0.584965	0.529512
1591	NM_004330>BNIP2	BNIP2	0.764073	0.0363352
1592	NM_004052>BNIP3	BNIP3	1.21174	0.497027
1593	NM_004331>BNIP3L	BNIP3L	1.02687	0.963774
1594	NM_001159642>BNIPL	BNIPL	1.14876	0.367302
1595	NM_033254>BOC	BOC	2.9796	0.118411
1596	NM_001159651>BOD1	BOD1	0.918058	0.896478
1597	NM_148894>BOD1L1	BOD1L1	1.02614	0.903644
1598	NM_001257964>BOD1L2	BOD1L2	0.86473	0.327778
1599	NM_032515>BOK	BOK	0.186466	0.0276212
1600	NR_033346>BOK-AS1	BOK-AS1	0.673193	0.116579
1601	NM_016074>BOLA1	BOLA1	1.25661	0.630546
1602	NM_001031827>BOLA2	BOLA2	0.864114	0.502914
1603	NM_001039182>BOLA2B	BOLA2B	0.864114	0.502914
1604	NM_212552>BOLA3	BOLA3	0.750314	0.319961
1605	NR_045636>BOLA3-AS1	BOLA3-AS1	1.57226	0.00885009
1606	NM_033030>BOLL	BOLL	0.982756	0.373901
1607	NM_015201>BOP1	BOP1	0.89621	0.700921
1608	NM_024808>BORA	BORA	0.836686	0.382371
1609	NR_026783>BPESC1	BPESC1	1.16055	0.373901
1610	NM_199186>BPGM	BPGM	3.96473	0.0558716
1611	NR_026649>BPHL	BPHL	1.94351	0.0133314
1612	NM_001725>BPI	BPI	1.68504	0.0590415
1613	NM_001042439>BPIFA3	BPIFA3	1.0934	0.373901
1614	NM_033197>BPIFB1	BPIFB1	1.20263	0.182914
1615	NM_182519>BPIFB4	BPIFB4	1.06226	0.63712
1616	NM_174932>BPIFC	BPIFC	1.10059	0.373901
1617	NM_006085>BPNT1	BPNT1	1.02481	0.659699
1618	NM_182641>BPTF	BPTF	0.867175	0.277095
1619	NM_004333>BRAF	BRAF	0.951015	0.720651
1620	NM_006768>BRAP	BRAP	1.02262	0.849391
1621	NM_152743>BRAT1	BRAT1	0.933806	0.656186
1622	NM_007300>BRCA1	BRCA1	0.758121	0.276212
1623	NM_000059>BRCA2	BRCA2	1.02638	0.919037
1624	NM_001018055>BRCC3	BRCC3	0.763275	0.0315547
1625	NM_014577>BRD1	BRD1	0.979018	0.849949
1626	NM_001199455.6>BRD2	BRD2	1.45048	0.214833
1627	NM_007371>BRD3	BRD3	0.743471	0.236656
1628	NM_014299>BRD4	BRD4	0.722291	0.0214535
1629	NM_013263>BRD7	BRD7	0.774315	0.00237018
1630	NR_002730>BRD7P3	BRD7P3	0.773599	0.655926
1631	NM_001164326>BRD8	BRD8	0.722819	0.143653
1632	NR_027633>BRD9	BRD9	1.98894	0.0414926
1633	NM_001242805>BRDT	BRDT	1.00012	0.373901
1634	NM_001261840>BRE	BRE	3.38604	0.208101
1635	NR_028308>BRE-AS1	BRE-AS1	1.47333	0.0197287
1636	NR_015445>BREA2	BREA2	1.12522	0.824666
1637	NM_001242786>BRF1	BRF1	1.92285	0.093866
1638	NM_018310>BRF2	BRF2	1.03184	0.885181
1639	NM_015379>BRI3	BRI3	1.34997	0.176077
1640	NM_080626>BRI3BP	BRI3BP	0.531659	0.141151
1641	NM_182563>BRICD5	BRICD5	0.599418	0.0225297
1642	NM_032043>BRIP1	BRIP1	0.773825	0.327708
1643	NM_018321>BRIX1	BRIX1	0.855752	0.587244
1644	NM_018462>BRK1	BRK1	0.871466	0.469144
1645	NM_001024957>BRMS1	BRMS1	0.574817	0.595123
1646	NM_032352>BRMS1L	BRMS1L	0.619241	0.0625043
1647	NM_144695>BROX	BROX	0.776486	0.258534
1648	NM_001003694>BRPF1	BRPF1	0.639569	0.111119
1649	NM_015695>BRPF3	BRPF3	1.06853	0.741413
1650	NM_032430>BRSK1	BRSK1	0.812787	0.307761
1651	NM_001256629>BRSK2	BRSK2	0.982533	0.373901
1652	NM_033656>BRWD1	BRWD1	1.14943	0.399937
1653	NR_046655>BRWD1-AS1	BRWD1-AS1	0.814086	0.373901
1654	NR_033800>BRWD1-IT2	BRWD1-IT2	1.54448	0.157276
1655	NM_153252>BRWD3	BRWD3	1.37746	0.149041
1656	NR_037949>BSCL2	BSCL2	1.65011	0.17726
1657	NM_001143889>BSDC1	BSDC1	1.64699	0.388707
1658	NM_198589>BSG	BSG	0.914352	0.408903
1659	NM_003458>BSN	BSN	1.02268	0.833561
1660	NR_038866>BSN-AS2	BSN-AS2	0.896976	0.140776
1661	NM_001128326>BSPH1	BSPH1	1.13787	0.373901
1662	NM_017688>BSPRY	BSPRY	0.919196	0.373901
1663	NM_004334>BST1	BST1	0.391277	0.13088
1664	NM_004335>BST2	BST2	3.52762	0.0156574
1665	NM_003972>BTAF1	BTAF1	0.849415	0.342531
1666	NM_025238>BTBD1	BTBD1	0.706062	0.26109
1667	NM_032320>BTBD10	BTBD10	1.16644	0.494084
1668	NM_001017523>BTBD11	BTBD11	17.2422	1.65577e-05
1669	NM_144587>BTBD16	BTBD16	0.747479	9.84446e-06
1670	NM_001145101>BTBD18	BTBD18	0.930214	0.685809
1671	NM_001136537>BTBD19	BTBD19	3.26757	0.225617
1672	NM_017797>BTBD2	BTBD2	1.11005	0.663425
1673	NM_181443>BTBD3	BTBD3	1.47726	0.0801377
1674	NM_033271>BTBD6	BTBD6	0.760336	0.274679
1675	NM_001002860>BTBD7	BTBD7	1.16534	0.201977
1676	NM_183242>BTBD8	BTBD8	1.02479	0.950791
1677	NM_152733>BTBD9	BTBD9	0.558836	0.0366834
1678	NM_001729>BTC	BTC	1.65098	0.259435
1679	NM_000060>BTD	BTD	1.65053	0.13721
1680	NM_001037637>BTF3	BTF3	1.2233	0.276161
1681	NM_001243767>BTF3L4	BTF3L4	0.378371	0.38528
1682	NR_026983>BTF3P11	BTF3P11	1.43804	0.592788
1683	NM_001731>BTG1	BTG1	1.04321	0.865006
1684	NM_006763>BTG2	BTG2	0.202639	0.00981566
1685	NM_001130914>BTG3	BTG3	2.8697	0.184568
1686	NM_017589>BTG4	BTG4	1.20918	0.45667
1687	NM_000061>BTK	BTK	0.973829	0.889012
1688	NM_001085357>BTLA	BTLA	0.918544	0.141572
1689	NM_001732>BTN1A1	BTN1A1	0.93925	0.373901
1690	NM_007049>BTN2A1	BTN2A1	1.97602	0.00763627
1691	NM_001197239>BTN2A2	BTN2A2	0.376383	0.0193129
1692	NR_027795>BTN2A3P	BTN2A3P	1.44904	0.165173
1693	NM_194441>BTN3A1	BTN3A1	2.4774	0.162056
1694	NM_001197246>BTN3A2	BTN3A2	2.17876	0.10869
1695	NM_001242803>BTN3A3	BTN3A3	2.48428	0.22769
1696	NM_197975>BTNL3	BTNL3	1.08303	0.373901
1697	NM_001040462>BTNL8	BTNL8	1	0.116117
1698	NM_152547>BTNL9	BTNL9	1.06651	0.373901
1699	NM_033637>BTRC	BTRC	0.933848	0.37125
1700	NM_004336>BUB1	BUB1	0.723774	0.00356367
1701	NM_001211>BUB1B	BUB1B	0.539969	0.00231919
1702	NM_001007793>BUB3	BUB3	0.359733	0.342902
1703	NM_032725>BUD13	BUD13	0.699478	0.0792446
1704	NM_003910>BUD31	BUD31	1.00853	0.925003
1705	NM_007073>BVES	BVES	0.234747	0.000284375
1706	NR_037157>BVES-AS1	BVES-AS1	0.363293	0.0154935
1707	NM_004053>BYSL	BYSL	0.823883	0.494173
1708	NM_004758>BZRAP1	BZRAP1	1.01688	0.546324
1709	NR_038415>BZRAP1-AS1	BZRAP1-AS1	0.969766	0.386521
1710	NM_014670>BZW1	BZW1	0.411037	0.218029
1711	NM_001159767>BZW2	BZW2	1.17113	0.227222
1712	NM_007021>C10orf10	C10orf10	3.93122	0.13571
1713	NM_001168390>C10orf105	C10orf105	1.07107	0.117467
1714	NM_173554>C10orf107	C10orf107	0.877052	0.403399
1715	NM_032024>C10orf11	C10orf11	1.62921	0.201955
1716	NM_153244>C10orf111	C10orf111	0.633589	0.105367
1717	NM_001010911>C10orf114	C10orf114	0.596452	0.132151
1718	NM_006829>C10orf116	C10orf116	1.11317	0.767696
1719	NM_018017>C10orf118	C10orf118	1.35805	0.232403
1720	NM_015652>C10orf12	C10orf12	0.892049	0.662002
1721	NM_001010912>C10orf120	C10orf120	0.863289	0.373901
1722	NM_207321>C10orf129	C10orf129	0.906086	0.373901
1723	NM_001130446>C10orf131	C10orf131	1.05486	0.866299
1724	NM_015608>C10orf137	C10orf137	0.978989	0.881837
1725	NM_001163813>C10orf2	C10orf2	0.703075	0.186275
1726	NM_001039380>C10orf25	C10orf25	1.04553	0.652826
1727	NM_001136200>C10orf32	C10orf32	0.911524	0.508516
1728	NR_037644>C10orf32-AS3MT	C10orf32-AS3MT	0.517047	0.188291
1729	NM_145306>C10orf35	C10orf35	0.48936	0.000127076
1730	NR_024340>C10orf40	C10orf40	1.05389	0.373901
1731	NM_022153>C10orf54	C10orf54	0.639279	0.210571
1732	NM_001001791>C10orf55	C10orf55	3.44945	0.0143936
1733	NM_001009997>C10orf62	C10orf62	1.014	0.948555
1734	NM_153714>C10orf67	C10orf67	1.06966	0.223293
1735	NM_024688>C10orf68	C10orf68	1.13162	0.55265
1736	NM_001135196>C10orf71	C10orf71	0.908248	0.373901
1737	NM_024541>C10orf76	C10orf76	0.824802	0.117488
1738	NM_144661>C10orf82	C10orf82	0.852789	0.373901
1739	NM_024942>C10orf88	C10orf88	1.1998	0.343825
1740	NM_001004298>C10orf90	C10orf90	3.16337	0.000782652
1741	NM_173541>C10orf91	C10orf91	1.77109	0.14834
1742	NM_024886>C10orf95	C10orf95	0.595584	0.0258632
1743	NM_022761>C11orf1	C11orf1	0.62881	0.0164776
1744	NM_020643>C11orf16	C11orf16	0.905245	0.702372
1745	NM_001039496>C11orf20	C11orf20	1.15576	0.602391
1746	NM_001142946>C11orf21	C11orf21	1.01438	0.373901
1747	NM_022338>C11orf24	C11orf24	1.16233	0.332915
1748	NM_020193>C11orf30	C11orf30	0.952747	0.74747
1749	NM_170746>C11orf31	C11orf31	0.865228	0.282527
1750	NM_001145024>C11orf34	C11orf34	1.12157	0.545438
1751	NM_173573>C11orf35	C11orf35	0.906253	0.770435
1752	NM_173525>C11orf42	C11orf42	1.27293	0.342545
1753	NM_001271983>C11orf44	C11orf44	0.92061	0.64327
1754	NM_001256088>C11orf45	C11orf45	3.62549	0.00286068
1755	NM_024099>C11orf48	C11orf48	0.637354	0.0420814
1756	NM_024113>C11orf49	C11orf49	0.655614	0.240871
1757	NM_080659>C11orf52	C11orf52	1.0096	0.965649
1758	NM_198498>C11orf53	C11orf53	1.08985	0.373901
1759	NM_014039>C11orf54	C11orf54	0.74733	0.201785
1760	NM_018195>C11orf57	C11orf57	1.35369	0.535491
1761	NM_014267>C11orf58	C11orf58	1.02785	0.897496
1762	NM_024806>C11orf63	C11orf63	1.87967	0.00461616
1763	NM_152587>C11orf65	C11orf65	1.1156	0.568496
1764	NM_001135635>C11orf68	C11orf68	1.11535	0.376068
1765	NM_001195005>C11orf70	C11orf70	0.452302	0.0406238
1766	NM_019021>C11orf71	C11orf71	3.33014	0.138249
1767	NM_016401>C11orf73	C11orf73	0.884885	0.220946
1768	NM_138787>C11orf74	C11orf74	1.33805	0.234698
1769	NM_020179>C11orf75	C11orf75	0.964947	0.917371
1770	NR_048553>C11orf80	C11orf80	0.587368	0.14658
1771	NM_145018>C11orf82	C11orf82	0.881601	0.583935
1772	NM_001085372>C11orf83	C11orf83	0.841661	0.42865
1773	NM_138471>C11orf84	C11orf84	0.639891	0.0765007
1774	NM_001136485>C11orf86	C11orf86	0.946042	0.796108
1775	NM_207645>C11orf87	C11orf87	0.160692	0.000177639
1776	NM_001100388>C11orf88	C11orf88	1.57175	0.390788
1777	NM_001166692>C11orf91	C11orf91	1.69398	0.453551
1778	NR_034154>C11orf92	C11orf92	1.06437	0.477656
1779	NM_001136105>C11orf93	C11orf93	1.82533	0.324308
1780	NM_001080446>C11orf94	C11orf94	0.891021	0.775521
1781	NM_001144936>C11orf95	C11orf95	1.36613	0.00797931
1782	NM_001145033>C11orf96	C11orf96	1.99352	0.300557
1783	NM_021640>C12orf10	C12orf10	0.865318	0.1352
1784	NM_152261>C12orf23	C12orf23	2.09722	0.0333629
1785	NM_001009894>C12orf29	C12orf29	1.18446	0.550084
1786	NR_036555>C12orf36	C12orf36	1.15692	0.230404
1787	NM_030572>C12orf39	C12orf39	1.75004	0.309398
1788	NM_020374>C12orf4	C12orf4	1.07749	0.745775
1789	NM_198521>C12orf42	C12orf42	1.53758	0.178123
1790	NM_022895>C12orf43	C12orf43	0.843943	0.459101
1791	NM_021934>C12orf44	C12orf44	1.11856	0.708509
1792	NM_152318>C12orf45	C12orf45	0.933091	0.769249
1793	NM_024738>C12orf49	C12orf49	0.947348	0.618194
1794	NM_020375>C12orf5	C12orf5	0.911246	0.604852
1795	NM_152589>C12orf50	C12orf50	0.923271	0.638304
1796	NM_032848>C12orf52	C12orf52	1.04481	0.621352
1797	NM_001099676>C12orf56	C12orf56	0.831047	0.373901
1798	NM_138425>C12orf57	C12orf57	0.897087	0.455844
1799	NM_175874>C12orf60	C12orf60	0.85832	0.502401
1800	NM_175895>C12orf61	C12orf61	1.74902	0.00321654
1801	NM_001194995>C12orf65	C12orf65	0.337269	0.169381
1802	NM_152440>C12orf66	C12orf66	1.40794	0.00327724
1803	NM_001013635>C12orf68	C12orf68	1.31472	0.655928
1804	NM_001013698>C12orf69	C12orf69	1.42322	0.0780217
1805	NM_001145010>C12orf70	C12orf70	0.821853	0.722913
1806	NM_001080406>C12orf71	C12orf71	1.29159	0.280519
1807	NM_001135570>C12orf73	C12orf73	1.02176	0.917712
1808	NM_001145199>C12orf75	C12orf75	0.859996	0.721284
1809	NM_207435>C12orf76	C12orf76	0.917222	0.73133
1810	NM_001101339>C12orf77	C12orf77	0.89318	0.373901
1811	NM_001257995>C13orf45	C13orf45	1.98777	0.047759
1812	NM_007176>C14orf1	C14orf1	0.879192	0.0176758
1813	NM_017799>C14orf101	C14orf101	2.12779	0.00290706
1814	NM_018168>C14orf105	C14orf105	1.04511	0.678304
1815	NM_017924>C14orf119	C14orf119	1.13062	0.118426
1816	NM_001252507>C14orf132	C14orf132	26.5142	9.4554e-06
1817	NM_032490>C14orf142	C14orf142	0.687993	0.0940843
1818	NM_001102368>C14orf159	C14orf159	0.694405	0.234319
1819	NM_016039>C14orf166	C14orf166	1.02053	0.922399
1820	NM_194287>C14orf166B	C14orf166B	0.955473	0.710532
1821	NM_024644>C14orf169	C14orf169	1.26042	0.359937
1822	NM_182560>C14orf177	C14orf177	1.07437	0.373901
1823	NM_174943>C14orf178	C14orf178	1.0834	0.67469
1824	NM_001012706>C14orf182	C14orf182	1.4498	0.0195918
1825	NM_001014830>C14orf183	C14orf183	0.763291	0.373901
1826	NM_004894>C14orf2	C14orf2	0.66267	0.00846527
1827	NR_026731>C14orf23	C14orf23	0.503075	0.0427105
1828	NM_001017923>C14orf28	C14orf28	0.894558	0.502692
1829	NM_001001872>C14orf37	C14orf37	4.6051	0.00145482
1830	NM_174978>C14orf39	C14orf39	0.971324	0.712648
1831	NR_015430>C14orf64	C14orf64	1.13248	0.373901
1832	NM_174891>C14orf79	C14orf79	1.6048	0.104739
1833	NM_001134876>C14orf80	C14orf80	2.81326	0.0170277
1834	NM_001130706>C14orf93	C14orf93	0.655255	0.0279048
1835	NM_173528>C15orf26	C15orf26	1.17628	0.282372
1836	NM_152335>C15orf27	C15orf27	1.03902	0.822071
1837	NR_028330>C15orf37	C15orf37	0.633397	0.104973
1838	NM_182616>C15orf38	C15orf38	0.897748	0.700817
1839	NM_001199058>C15orf38-AP3S2	C15orf38-AP3S2	0.708178	0.346816
1840	NM_015492>C15orf39	C15orf39	0.911916	0.544328
1841	NM_144597>C15orf40	C15orf40	0.63871	0.117882
1842	NM_032499>C15orf41	C15orf41	0.688478	0.0952325
1843	NM_197955>C15orf48	C15orf48	0.493693	0.222551
1844	NM_207380>C15orf52	C15orf52	0.829964	0.173612
1845	NM_207444>C15orf53	C15orf53	0.969099	0.898677
1846	NM_207445>C15orf54	C15orf54	2.4465	0.0384706
1847	NM_175741>C15orf55	C15orf55	1.06402	0.446929
1848	NM_001039905>C15orf56	C15orf56	0.964333	0.717149
1849	NM_001080792>C15orf57	C15orf57	0.77919	0.0509925
1850	NM_001039614>C15orf59	C15orf59	2.24333	0.0677968
1851	NM_001042367>C15orf60	C15orf60	1.34371	0.373901
1852	NM_001143936>C15orf61	C15orf61	0.678933	0.0661207
1853	NM_001130448>C15orf62	C15orf62	0.586246	0.315695
1854	NM_145270>C16orf11	C16orf11	1.04453	0.373901
1855	NM_001040162>C16orf13	C16orf13	0.372612	0.315386
1856	NM_001214>C16orf3	C16orf3	0.966709	0.930639
1857	NM_033201>C16orf45	C16orf45	1.65796	0.143259
1858	NM_001100873>C16orf46	C16orf46	1.21479	0.546373
1859	NM_001164579>C16orf52	C16orf52	0.863967	0.433056
1860	NM_175900>C16orf54	C16orf54	1.4305	0.247171
1861	NM_001271907>C16orf55	C16orf55	0.287864	0.119272
1862	NM_022744>C16orf58	C16orf58	1.44251	0.100449
1863	NM_025108>C16orf59	C16orf59	0.63143	0.292014
1864	NM_020314>C16orf62	C16orf62	0.850617	0.407855
1865	NM_025187>C16orf70	C16orf70	0.930006	0.395707
1866	NM_139170>C16orf71	C16orf71	0.988274	0.961806
1867	NM_014117>C16orf72	C16orf72	1.15583	0.382172
1868	NM_206967>C16orf74	C16orf74	1.40082	0.597675
1869	NM_144602>C16orf78	C16orf78	0.767171	0.373901
1870	NM_013242>C16orf80	C16orf80	0.661219	0.0730016
1871	NM_001145545>C16orf82	C16orf82	0.923835	0.373901
1872	NM_001012984>C16orf86	C16orf86	0.768007	0.407218
1873	NM_001001436>C16orf87	C16orf87	0.949573	0.820659
1874	NM_001012991>C16orf88	C16orf88	1.00418	0.986784
1875	NM_001098514>C16orf89	C16orf89	1.52288	0.118008
1876	NM_001080524>C16orf90	C16orf90	1.10313	0.373901
1877	NM_001010878>C16orf91	C16orf91	0.853646	0.277944
1878	NM_001109659>C16orf92	C16orf92	1.289	0.373901
1879	NM_001195620>C16orf93	C16orf93	1.00724	0.373901
1880	NM_001195124>C16orf95	C16orf95	0.173966	0.00409115
1881	NM_001145011>C16orf96	C16orf96	1.02925	0.373901
1882	NM_001105520>C17orf100	C17orf100	2.34926	0.0117682
1883	NM_207454>C17orf102	C17orf102	1.02517	0.373901
1884	NM_152914>C17orf103	C17orf103	1.10942	0.743445
1885	NM_001145080>C17orf104	C17orf104	1.03647	0.892116
1886	NM_001136483>C17orf105	C17orf105	1.11179	0.373901
1887	NM_001145536>C17orf107	C17orf107	0.690979	0.0457525
1888	NM_001038704>C17orf47	C17orf47	1.45167	0.134997
1889	NM_174893>C17orf49	C17orf49	0.527691	0.357166
1890	NM_145272>C17orf50	C17orf50	1.06431	0.750535
1891	NM_001113434>C17orf51	C17orf51	1.47658	0.0769637
1892	NM_001171251>C17orf53	C17orf53	0.608452	0.0751253
1893	NM_181655>C17orf58	C17orf58	1.15425	0.285028
1894	NM_017622>C17orf59	C17orf59	0.671592	0.0919031
1895	NR_037719>C17orf61-PLSCR3	C17orf61-PLSCR3	1.92742	0.0269528
1896	NM_001193657>C17orf62	C17orf62	0.449405	0.00549164
1897	NM_152781>C17orf66	C17orf66	1.30669	0.1534
1898	NM_001085430>C17orf67	C17orf67	1.55222	0.0213008
1899	NR_033338>C17orf70	C17orf70	0.519539	0.123908
1900	NM_001191031>C17orf72	C17orf72	1.34774	0.0227472
1901	NM_175734>C17orf74	C17orf74	0.997751	0.989462
1902	NM_022344>C17orf75	C17orf75	0.73722	0.0362364
1903	NR_027179>C17orf76-AS1	C17orf76-AS1	0.063608	0.0128021
1904	NM_152460>C17orf77	C17orf77	0.930262	0.373901
1905	NM_173625>C17orf78	C17orf78	1.10248	0.642093
1906	NM_017941>C17orf80	C17orf80	0.6345	0.0408372
1907	NM_203425>C17orf82	C17orf82	1.03661	0.919415
1908	NM_001114118>C17orf85	C17orf85	0.87238	0.12235
1909	NM_001086521>C17orf89	C17orf89	0.722354	0.0563186
1910	NM_001130677>C17orf96	C17orf96	1.00135	0.994914
1911	NM_001013672>C17orf97	C17orf97	0.605134	0.0205812
1912	NM_001080465>C17orf98	C17orf98	0.538587	0.133892
1913	NM_001163075>C17orf99	C17orf99	0.670995	0.0658916
1914	NM_001201474>C18orf21	C18orf21	0.597864	0.182786
1915	NM_001008239>C18orf25	C18orf25	0.926873	0.71343
1916	NM_001199346>C18orf32	C18orf32	1.02407	0.390025
1917	NM_001145194>C18orf42	C18orf42	0.943169	0.731712
1918	NM_173529>C18orf54	C18orf54	0.756336	0.248056
1919	NM_001012716>C18orf56	C18orf56	0.370337	0.000574821
1920	NR_049896>C18orf61	C18orf61	1.06564	0.551046
1921	NM_013326>C18orf8	C18orf8	0.728135	0.106704
1922	NM_019107>C19orf10	C19orf10	1.73627	0.00823952
1923	NM_001031726>C19orf12	C19orf12	1.53811	0.05989
1924	NM_152474>C19orf18	C19orf18	1.35096	0.349962
1925	NM_173481>C19orf21	C19orf21	0.919754	0.230445
1926	NM_017914>C19orf24	C19orf24	0.882097	0.480357
1927	NM_152482>C19orf25	C19orf25	0.729559	0.118383
1928	NM_152769>C19orf26	C19orf26	1.25214	0.425096
1929	NM_033520>C19orf33	C19orf33	1.21603	0.66849
1930	NM_198532>C19orf35	C19orf35	0.947461	0.728637
1931	NM_001136482>C19orf38	C19orf38	0.792736	0.220736
1932	NM_152266>C19orf40	C19orf40	0.901056	0.447965
1933	NM_024038>C19orf43	C19orf43	0.751707	0.239791
1934	NM_032207>C19orf44	C19orf44	0.794395	0.147054
1935	NM_198534>C19orf45	C19orf45	1.05802	0.373901
1936	NR_046202>C19orf47	C19orf47	0.372435	0.0347342
1937	NM_199249>C19orf48	C19orf48	0.496974	0.23105
1938	NM_138358>C19orf52	C19orf52	0.92085	0.538311
1939	NM_014047>C19orf53	C19orf53	0.852968	0.163149
1940	NM_198476>C19orf54	C19orf54	0.701811	0.212109
1941	NM_001039887>C19orf55	C19orf55	1.04268	0.874271
1942	NM_024323>C19orf57	C19orf57	0.922572	0.793036
1943	NM_174918>C19orf59	C19orf59	0.926316	0.373901
1944	NM_033420>C19orf6	C19orf6	2.1162	0.275639
1945	NM_001100419>C19orf60	C19orf60	0.311655	0.0241976
1946	NM_018381>C19orf66	C19orf66	1.53208	0.377151
1947	NM_205767>C19orf70	C19orf70	1.00759	0.977116
1948	NM_001135580>C19orf71	C19orf71	1.63242	0.0508259
1949	NM_018111>C19orf73	C19orf73	1.15418	0.519311
1950	NM_001136503>C19orf77	C19orf77	0.678841	0.337263
1951	NM_018687>C19orf80	C19orf80	0.992195	0.960538
1952	NM_001195076>C19orf81	C19orf81	1.2303	0.373901
1953	NM_173177>C1D	C1D	3.23806	0.223708
1954	NM_020156>C1GALT1	C1GALT1	1.23758	0.568754
1955	NM_152692>C1GALT1C1	C1GALT1C1	2.04184	0.201921
1956	NM_000491>C1QB	C1QB	1.16789	0.373901
1957	NM_001212>C1QBP	C1QBP	0.612732	0.0354943
1958	NM_001114101>C1QC	C1QC	1.00345	0.960316
1959	NM_006688>C1QL1	C1QL1	0.77918	0.329842
1960	NM_001010908>C1QL3	C1QL3	0.931667	0.373901
1961	NM_001008223>C1QL4	C1QL4	1.17626	0.71322
1962	NM_030968>C1QTNF1	C1QTNF1	3.50869	0.116297
1963	NM_031908>C1QTNF2	C1QTNF2	2.33204	0.0645246
1964	NM_181435>C1QTNF3	C1QTNF3	0.98879	0.694902
1965	NR_037951>C1QTNF3-AMACR	C1QTNF3-AMACR	0.910017	0.831967
1966	NM_031909>C1QTNF4	C1QTNF4	0.92781	0.755221
1967	NM_015645>C1QTNF5	C1QTNF5	1.5828	0.0297216
1968	NM_182486>C1QTNF6	C1QTNF6	1.02145	0.701349
1969	NM_001135170>C1QTNF7	C1QTNF7	1.01032	0.373901
1970	NM_178540>C1QTNF9	C1QTNF9	1	?
1971	NM_001007537>C1QTNF9B	C1QTNF9B	1.14567	0.817002
1972	NM_001135816>C1QTNF9B-AS1	C1QTNF9B-AS1	1.58007	0.360152
1973	NM_001733>C1R	C1R	26.056	1.22786e-05
1974	NM_016546>C1RL	C1RL	2.01327	0.231595
1975	NR_026947>C1RL-AS1	C1RL-AS1	1.2483	0.542144
1976	NM_201442>C1S	C1S	63.9486	0.000117834
1977	NM_001012970>C1orf100	C1orf100	1.48621	0.146203
1978	NM_001242340>C1orf101	C1orf101	1.08174	0.411279
1979	NM_001142569>C1orf106	C1orf106	1.42196	0.260502
1980	NM_017850>C1orf109	C1orf109	1.02631	0.811661
1981	NM_178550>C1orf110	C1orf110	1.14492	0.452684
1982	NM_182581>C1orf111	C1orf111	0.867594	0.374068
1983	NM_018186>C1orf112	C1orf112	0.77498	0.139934
1984	NM_021179>C1orf114	C1orf114	0.822593	0.438866
1985	NM_024709>C1orf115	C1orf115	0.730952	0.256983
1986	NM_001083924>C1orf116	C1orf116	1.45301	0.176044
1987	NM_198446>C1orf122	C1orf122	0.804965	0.611471
1988	NM_017887>C1orf123	C1orf123	0.731141	0.0160207
1989	NR_027136>C1orf126	C1orf126	1.34898	0.22706
1990	NM_001170754>C1orf127	C1orf127	1.15487	0.373901
1991	NM_152379>C1orf131	C1orf131	1.08106	0.555752
1992	NR_024236>C1orf140	C1orf140	1.15084	0.235172
1993	NM_001013674>C1orf141	C1orf141	1.09357	0.373901
1994	NR_073155>C1orf145	C1orf145	2.18677	5.7825e-05
1995	NM_001012425>C1orf146	C1orf146	0.905958	0.704984
1996	NM_001204088>C1orf151-NBL1	C1orf151-NBL1	2.78811	0.0289005
1997	NM_152290>C1orf158	C1orf158	0.938193	0.735361
[truncated: 18,664 more rows]
